# Supplementary material
Source: PubMed Central journal article supplement (PMC4883582)
Supplement: NIHMS786946-supplement-Supplement.pdf [file NIHMS786946-supplement-Supplement.pdf]

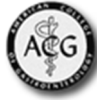

**Serial Fecal Microbiota Transplantation Alters Mucosal Gene  
Expression in Pediatric Ulcerative Colitis**

|                     |                                                                                                   |
|---------------------|---------------------------------------------------------------------------------------------------|
| Journal:            | <i>American Journal of Gastroenterology</i>                                                       |
| Manuscript ID:      | AJG-14-1867.R1                                                                                    |
| Manuscript Type:    | Letter to the Editor                                                                              |
| Keywords:           | Inflammatory bowel disease, fecal microbiota transplantation, gene expression, ulcerative colitis |
| Manuscript Section: | Inflammatory bowel disease, Pediatric                                                             |
|                     |                                                                                                   |

SCHOLARONE™  
Manuscripts

Review

# Serial Fecal Microbiota Transplantation Alters Mucosal Gene Expression

## in Pediatric Ulcerative Colitis

### Fecal Transplant in Pediatric Ulcerative Colitis

Richard Kellermayer<sup>1,3\*</sup>, Dorottya Nagy-Szakal<sup>1,3</sup>, R. Alan Harris<sup>4</sup>, Ruth Ann Luna<sup>2,5</sup>, Milena Pitashny<sup>2,5</sup>, Deborah Schady<sup>2,5</sup>, Sabina AV Mir<sup>1,3</sup>, Monica E. Lopez<sup>6</sup>, Mark A. Gilger<sup>1#</sup>, John Belmont<sup>4</sup>, Emily B. Hollister<sup>2,5</sup>, and James Versalovic<sup>2,5</sup>

<sup>1</sup>Section of Pediatric Gastroenterology, Department of Pediatrics, Baylor College of Medicine, Houston, Texas, United States of America; <sup>2</sup>Department of Pathology, Texas Children's Hospital, Houston, Texas, United States of America; <sup>3</sup>USDA/ARS Children's Nutrition Research Center, Houston, Texas, United States of America; <sup>4</sup>Department of Human and Molecular Genetics, Baylor College of Medicine, Houston, Texas, United States of America; <sup>5</sup>Department of Pathology & Immunology, Baylor College of Medicine, Houston, Texas, United States of America; <sup>6</sup>Department of Surgery, Baylor College of Medicine, Houston, Texas, United States of America, #Current address: Children's Hospital of San Antonio, Department of Pediatrics, Baylor College of Medicine, Houston, Texas, United States of America

Author contribution: study concept and design: RK, DNS, RAL, MP, MAG, JV; acquisition of data: RK, DNS, DS, SAVM, MEL; analysis and interpretation of data: RK, DNS, RAH, RAL, JB, EBH, JV; drafting of the manuscript: RK, DNS, EBH; critical revision of the manuscript for important intellectual content: RK, MEL, EBH, JB, JV; statistical analysis: RK, RAH, EBH; obtained funding: RK, JV; technical, or material support: MP, JV; study supervision: RK, JV  
Funding and support: Gutsy Kids Fund including philanthropic donation from the Karen and Brock Wagner family, and the support of the Houston Men of Distinction. The work in JV's laboratory is supported in part by research support from the National Institutes of Health (NIH) (UH3 DK083990 and U01 CA170930). The authors also acknowledge support from the NIH for the Texas Medical Center Digestive Diseases Center (P30 DK56338).

Word count: 732

#### \*Correspondence:

Richard Kellermayer M.D., Ph.D.  
Section of Pediatric Gastroenterology, Hepatology & Nutrition  
Baylor College of Medicine  
6621 Fannin St., CC1010.00  
Houston, TX 77030-2399  
Voice: 713-798-0319  
Fax: 832-825-3633  
Email: kellerma@bcm.edu

**To the Editor:** Complex bacteriotherapy, such as fecal microbiota transplantation (FMT) is an emerging therapeutic modality for ulcerative colitis (UC).(1) FMT has been implicated to allow for withdrawal of conventional therapies in select patients.(2) In our study, three immunotherapy (infliximab, 6-mercaptopurine, and steroid, respectively) dependent pediatric (14-16 year of age) UC patients (**Table 1**) received a tapering course (22-30 treatments) of FMT delivered by colonoscopy and enemas during a 6-12 week period. The phase 1, open label protocol was approved by the Institutional Review Board of Baylor College of Medicine (H-30591). The protocol is currently approved by the FDA (IND-15743; ClinicalTrials.gov number: NCT01947101). Filtered, frozen, and thawed stool specimen from a standardized single donor (37-year-old male) for all 3 patients was used, which provided unique opportunity to examine microbial changes. Patients were concomitantly withdrawn from their conventional medications. Mucosal disease activity was assessed before, and 2 weeks after the FMT series. Clinical disease activity was followed by the Pediatric Ulcerative Colitis Activity Index (PUCAI). The FMT series was well tolerated and transiently supported immunotherapy withdrawal (**Supplementary Figure 1**). FMT enabled all 3 patients to be symptom-free for at least 4 weeks following FMT and supported the withdrawal of immunotherapy (no treatment other than mesalamine) for more than 105 days in all. The number of FMT treatments significantly correlated with the time of being immunotherapy-free ( $r=0.998$ ,  $p=0.04$ ; **Supplementary Figure 2**). All patients were in endoscopic and histologic remission 2 weeks after the last FMT (**Supplementary Figure 3-4**).

Fecal microbiomes were analyzed by massively parallel pyrosequencing of the V3V5 regions within the bacterial *16S rRNA* gene. The nature of microbiota shifts differed, presumably due to differences in baseline composition of intestinal microbiota in each patient (detected by principal-coordinates-analysis, **Figure 1A**). Recipient microbiomes remained distinct from that of the anonymous donor. FMT series appeared to induce a transient engraftment of the donor microbiome in a recipient (**Supplementary Figure 5**). Microbiome richness (**Figure 1B**) and diversity (**Figure 1C**) increased secondary to FMT. Fifteen operational taxonomic units (OTUs

or bacterial taxa) consistently changed in relative abundance in all 3 patients following FMT ( $p < 0.25$ ; **Supplementary Table 1**). Six of 8 OTUs that increased in abundance were not detected in the donor or the recipient prior to FMT. Therefore, expansion of rare taxa may be functionally important in restoring colonic health, at least for short-term periods, following FMT. Of the OTUs that were increased in abundance 61.5% belonged to the *Lachnospiraceae* family. The abundance of *Lachnospiraceae* has been inversely correlated with UC disease activity,(3) and those were more abundant in healthy members of monozygotic twin pairs discordant for UC, compared to control.(4) At the genus level, only *Coprococcus* changed (increased) in abundance by more than 2 fold. The abundance of *Coprococcus* (a genus including butyrate producing bacteria) has been detected to be decreased in IBD patients.(5) Therefore, the increased abundance of *Coprococcus* and *Lachnospiraceae* upon the FMT series may have delivered beneficial effects to the colonic epithelium of the UC patients (recipients).

Colonic mucosal gene expression profiles in response to the FMT series were interrogated by RNA sequencing. The expression of 742 genes decreased and 12 increased ( $>1.5$  fold change in expression, false discovery rate [FDR] $<0.05$ ) upon the FMT therapy (**Supplementary Table 2-3**). Importantly, the suppression of human gene expression relevant in leukocyte activation and mitotic cell cycle progression was observed (**Supplementary Figure 6-7**). These molecular findings associated with  $>50\%$  decline in epithelial cell mitosis in 2 out of the 3 patients (**Supplementary Figure 8**).

**In conclusion**, this report describes high intensity FMT as a strategy to reset the intestinal microbiota in pediatric IBD. Serial FMT in pediatric UC may induce beneficial changes in patient microbiota and colonic mucosa. Randomized trials will be required in the future to answer many challenging questions (donor selection, patient selection, number and length of FMT therapy required, etc.) in respect to the clinical application of this treatment.

**ACKNOWLEDGEMENTS**

The authors would like to thank the patients and families for participating, the Texas Children's Hospital Research Resources Office (Supriya Parikh, Drs. Susan Blaney and Lisa Bomgaars,), the Gutsy Kids Fund including philanthropic donation from the Karen and Brock Wagner family, and the support of the Houston Men of Distinction. The work in JV's laboratory is supported in part by research support from the National Institutes of Health (NIH) (UH3 DK083990 and U01 CA170930). The authors also acknowledge support from the NIH for the Texas Medical Center Digestive Diseases Center (P30 DK56338).

**CONFLICT OF INTEREST**

The authors declare no conflict of interest.

## TABLES

| Patients<br>(Age,<br>Gender) | Disease<br>Behavior | Mayo<br>Score | Tx<br>after<br>Dx | Mayo<br>Score | FMT<br># | Remission<br>during<br>FMT (in<br>Days) | Mayo<br>Score | Remission<br>after last<br>Medication<br>(Days) | Remission<br>after last<br>FMT<br>(Days) | Tx following<br>Flare    |
|------------------------------|---------------------|---------------|-------------------|---------------|----------|-----------------------------------------|---------------|-------------------------------------------------|------------------------------------------|--------------------------|
|                              |                     | At Dx         |                   | Before<br>FMT |          |                                         | After<br>FMT  |                                                 |                                          |                          |
| 1 (16y M)                    | Pancolitis          | 2             | IFX               | 0             | 30       | 65/70<br>(93%)                          | 0             | 261                                             | 126                                      | IFX                      |
| 2 (15y M)                    | Pancolitis          | 2             | 6MP               | 1             | 25       | 58/58<br>(100%)                         | 0             | 159                                             | 80                                       | PRED<br>FMT              |
| 3 (14y F)                    | Pancolitis          | 3             | PRED              | 0             | 22       | 36/36<br>(100%)                         | 0             | 105                                             | 79                                       | PRED<br>FMT<br>Colectomy |

Table 1. Patient characteristics and clinical outcomes after sequential FMT (IFX: infliximab; 6MP: 6-mercaptopurine; PRED; prednisone).

## FIGURE LEGENDS

**Figure 1. Fecal Microbiota Shifts Following FMT.** Principle coordinates analysis of unweighted Unifrac distances (A.) revealed that microbial community changes during FMT (arrows connect pre-FMT [within 24 hours before first FMT] and post-FMT [2-3 weeks after last FMT] samples from each patient) were not consistent within each patient (did not shift in the same direction for each patient), and post-FMT fecal communities of recipients (patients) following FMT were dissimilar from that of the donor (▲: donor stool; ■: donor preparations from independent bowel movements on separate days). Microbial richness (B.) and diversity (C.) in terms of microbial taxa consistently increased following the FMT, although these trends did not reach statistical significance.

## STUDY HIGHLIGHTS

### 1. WHAT IS CURRENT KNOWLEDGE

- Fecal microbiota transplantation (FMT) is an emerging treatment for UC with limited number of clinical trials showing variable results.

### 2. WHAT IS NEW HERE

- Three pediatric immunosuppression-dependent UC patients received an unprecedentedly intense FMT regimen during the cessation of their conventional medications.
- This is the first study to examine genome-wide gene expression (RNA-sequencing) responses to FMT.
- Our single donor strategy created an unprecedented opportunity to examine the effects of one source microbiome in different recipients.
- FMT in the context of the 3 patients studied was safe and enabled the short-term withdrawal of immunotherapy.

Keywords: inflammatory bowel disease; fecal microbiota transplantation; gene expression; ulcerative colitis

**REFERENCES**

1. Colman RJ, Rubin DT. Fecal microbiota transplantation as therapy for inflammatory bowel disease: A systematic review and meta-analysis. *J Crohns Colitis* 2014.
2. Kunde S, Pham A, Bonczyk S, et al. Safety, Tolerability, and Clinical Response after Fecal Transplantation in Children and Young Adults with Ulcerative Colitis. *J Pediatr Gastroenterol Nutr* 2013.
3. Angelberger S, Reinisch W, Makristathis A, et al. Temporal Bacterial Community Dynamics Vary Among Ulcerative Colitis Patients After Fecal Microbiota Transplantation. *Am J Gastroenterol* 2013;108:1620-1630.
4. Lepage P, Hasler R, Spehlmann ME, et al. Twin study indicates loss of interaction between microbiota and mucosa of patients with ulcerative colitis. *Gastroenterology* 2011;141:227-36.
5. Chen L, Wang W, Zhou R, et al. Characteristics of fecal and mucosa-associated microbiota in chinese patients with inflammatory bowel disease. *Medicine (Baltimore)* 2014;93:e51.



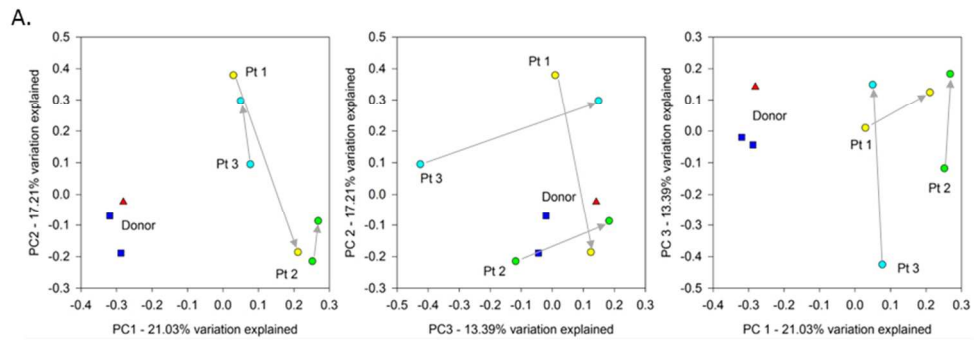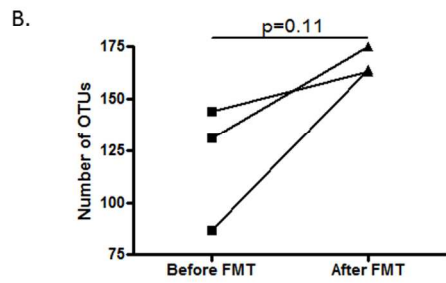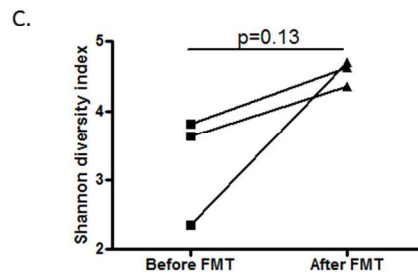

81x60mm (300 x 300 DPI)

Review

**Supplement to:**  
**Serial Fecal Microbiota Transplantation Alters Mucosal Gene Expression in Pediatric Ulcerative Colitis**

**Table of Contents:**

|                        |          |
|------------------------|----------|
| Supplementary methods  | p.2-11   |
| Supplementary Table 1  | p.12     |
| Supplementary Table 2  | p.12-28  |
| Supplementary Table 3  | p.28     |
| Supplementary Table 4  | p.29-30  |
| Supplementary Table 5  | p.30     |
| Supplementary Figure 1 | p. 31-32 |
| Supplementary Figure 2 | p.33     |
| Supplementary Figure 3 | p.34     |
| Supplementary Figure 4 | p.35     |
| Supplementary Figure 5 | p.36     |
| Supplementary Figure 6 | p.37-38  |
| Supplementary Figure 7 | p.39     |
| Supplementary Figure 8 | p.40     |
| References             | p.41     |

## SUPPLEMENTARY METHODS

### FMT PROTOCOL

#### *Subject and Donor Recruitment*

Patients: Subjects were recruited from the patients treated by the Pediatric Gastroenterology, Hepatology, and Nutrition Section at Baylor College of Medicine/Texas Children's Hospital. Only patients whose clinical, endoscopic and histologic findings supported the diagnosis of UC were recruited. Only steroid, thiopurine, or biologic agent dependent patients were included following informed consent (i.e. "immunotherapy" dependent). Enrollees had to test negative for *Clostridium difficile* toxin by PCR, or enzyme immunoassay (EIA), and agree to withdraw all medications prior to and during the trial (see below). They also had to agree to a pre-treatment surgical consultation and acknowledge the potential need for colectomy, if disease exacerbations cannot be controlled by conventional medical therapy.

FMT Donors: Healthy adult stool donors (between 18 and 45 years of age) were recruited by the research staff following informed consent. Donors were asked to volunteer for the screening (pass a health questionnaire [Supplementary Table 4], serologic and stool tests [Supplementary Table 5]) and regularly supply stool samples according to the study protocol.

#### *FMT preparation*

The stool preparations were performed in the Texas Children's Microbiome Center (TCMC) in the Feigin Center, Texas Children's Hospital, Houston, Texas. This facility operates under Good Laboratory Practice (GLP) and is part of the clinical enterprise in the Department of Pathology, accredited by the College of American Pathologists (CAP) and certified by Clinical Laboratory Improvement Amendment (CLIA). Standard Operating Procedures on fecal specimen preparation and for decontamination procedures for biosafety cabinets and equipment were

followed before and after fecal preparation. Freshly collected stool specimens from the healthy adult donor (within 2 hours of passing) were delivered on ice for processing. Specimens were aliquoted to ~50 g aliquots, and cold sterile normal saline solution (NSS) was added prior to homogenization in a strainer bag with 500- $\mu$ m pore size (Seward Laboratory Systems Inc., Port Saint Lucie, FL) using the Smasher Laboratory Blender/Homogenizer (AES CHEMUNEX Inc., Cranbury, NJ). Sterile glycerol was added to filtered homogenized stool specimens containing the fecal microbiome at a final concentration of 10% according to Hamilton et al.<sup>1</sup> Stool preparations were immediately stored at -80°C until transplantation or analysis. All stool preparations were labeled with an expiration date 8 weeks from the date of preparation. At each FMT treatment, fecal preparations were rapidly thawed at 35°C in a water bath and used within 15 minutes. Sterile NSS was used as a diluent to reach the final volume of 250 ml from 50mg of original stool prior to delivery.

#### *Steps before FMT treatment*

Discontinuation or taper of UC therapy to initiation of FMTs: Subjects tapered their home medications for UC prior to the FMT protocol. Subjects did not have a history of antimicrobial therapy for at least 1 week prior to the initial pre-FMT colonoscopy. The corticosteroid dose was decreased to 50% of maintenance the day prior to the first pre-FMT colonoscopy. Thereafter, the dose was decreased by ~50% weekly over a maximum of 10 weeks following colonoscopy. The steroid taper was stopped once a patient's dose has been decreased to 5 mg/day for seven consecutive days. Immunomodulator and biologic treatments were discontinued for a minimum of 21 days prior to the FMT. Prebotic or probiotic therapy were discontinued at least 1 week before the initiation of FMT. Oral or rectal treatments of mesalamine were stopped within a week of initiation of FMT. However, mesalamine preparations were allowed to be restarted in case of flares during the trial.

Surgical Consult: A surgical consultation was required prior to the initiation of FMT therapy. The subject and family were counseled with regard to possible worsening of symptoms and possible life-threatening conditions that may emerge, necessitating surgical and/or intensive care interventions.

Survey before the FMT therapy: Once a subject was enrolled in the trial, they completed a clinical symptoms survey. Only patients with remission or mild disease category (pediatric ulcerative colitis activity index;<sup>2</sup> PUCAI<35) were allowed to participate. We included patients with PUCAI <35 within 4 weeks of enrollment. However, all 3 patients in this report were in remission (PUCAI <10) at the start of the trial.

Initiation of FMT therapy and pre-colonoscopy preparation: One day prior to scheduled colonoscopy, subjects collected a stool sample and stored it at -20°C at home in an airtight container. The samples were brought to colonoscopy in a chilled container provided for collection and transport within 24 hours of collection and stored at -80°C. After the stool sample was obtained, the subjects started the institution's standard for colonoscopy preparation regimen with Miralax.

#### *FMT treatment protocol*

Initial colonoscopy and FMT treatment (Day 1): At the time of colonoscopy, an assessment for macroscopic colitis using the Mayo classification was performed. Biopsies were obtained from the rectosigmoid and cecum in an ascending fashion for routine histopathology and research purposes. Following mucosal sampling, subjects underwent FMT with 250 ml of thawed stool preparation, 1/3 of which was endoscopically administered into the terminal ileum and 2/3 into the right colon as targeted site as found feasible by Brandt and colleagues.<sup>3</sup>

Subsequent FMT Treatments: The duration of FMT therapy was planned to be 12 weeks.

Days 2 through 14: Subjects came to the ambulatory clinic daily for clinical symptom evaluation and fecal retention enema administration (60-250 ml rectally [as tolerated] with retention for at least 30 minutes).

Days 15 through 28: Enemas were given 3 times a week on weeks 3 and 4 of the protocol.

Days 29-84 (2 to 3 months): Enemas were given weekly for a total of 3-8 weeks (less than 8 secondary to the cessation of the protocol according to the FDA mandate).

As supportive care, patients were allowed to take 4 mg (2 tablets of over the counter Imodium) loperamide by mouth 15-30 minutes prior to enema treatments to help retain the preparation.

This dose of loperamide is appropriate for the age group. Loperamide is over-the-counter and FDA approved for the treatment of inflammatory bowel disease associated diarrhea.

Response and progression was monitored by PUCAI during the protocol. The clinical symptoms survey was performed prior to each enema delivery and a disease progression table was recorded for each enrolled patient.

### *Follow-up*

#### Follow-up colonoscopy/sigmoidoscopy, sample collection and evaluation

Two weeks after the last weekly enema, colonoscopy with FMT was performed for patient 1. For the consecutive patients, we decided to perform flexible sigmoidoscopy without prior colon cleansing and those patients did not receive additional FMT. Stool samples were collected within one day of sigmoidoscopy. At the time of sigmoidoscopy, an assessment for macroscopic colitis using the Mayo classification was performed. Biopsies were obtained from the rectosigmoid area for routine histopathology and research purposes.

## DETAILED CASE REPORTS

The patients were enrolled into an Institutional Review Board (IRB) approved clinical trial prior to the Food and Drug Administration (FDA) mandating the need for an investigational drug application for FMT (that is not directed towards the treatment of recurrent CDI). The protocol was stopped after the FDA mandate was issued in May of 2013. Therefore, only 1 patient (patient 1) completed the full 12 week course (28 scheduled treatments + “rescue” enemas if clinically indicated) of FMT. The clinical course of patients is shown in Supplementary Figure 1.

Patient 1: A 16-year-old male was diagnosed with pancolitis (Mayo score<sup>4</sup>=2; Supplementary Figure 3) one year before enrollment. His prior therapy included infliximab, oral corticosteroids and mesalamine. He was weaned off oral steroids and continued on infliximab infusions with oral mesalamine. FMT was initiated when he was in clinical (pediatric ulcerative colitis activity index;<sup>2</sup> PUCAI=5), macroscopic (Supplementary Figure 3), and microscopic (Supplementary Figure 4) remission after 6 weeks without infliximab. Thirty (30) treatments were administered during 3 months. He received mesalamine enemas twice for mild exacerbations (PUCAI ≥15). The patient remained in clinical remission (PUCAI <10) for more than 90% (65/70 days) of the treatment course (Supplementary Figure 1A). No adverse events were noted. A follow-up endoscopy 3 weeks after the last FMT showed the entire colon to be grossly normal (Supplementary Figure 3). However, histological inflammation in his transverse colon was detected, and maintenance oral mesalamine therapy was started. The patient remained in clinical remission (symptom-free, lab values within normal ranges, including fecal calprotectin) for 8 months (261 days) after his last infliximab treatment, 4 months (126 days) after his last FMT. At this time, he developed a mild disease flare (PUCAI=25) and wished to go back on infliximab therapy. He has intermittent breakthrough symptoms on 7.5 mg/kg infliximab every 6 weeks and daily mesalamine treatments for over 1.5 years since re-institution of the biologic agent.

Patient 2: A 15-year-old male with a history of UC with pan-colitis (Mayo: 2; Supplementary Figure 3) was treated for more than one year with 6-mercaptopurine (6MP), allopurinol, and daily oral mesalamine. He tested positive for toxigenic *Clostridium difficile* infection (CDI) at enrollment. Metronidazole therapy successfully cleared the CDI prior to starting FMT. Allopurinol and 6MP were stopped 3 weeks prior to initiation of FMT. Initial colonoscopy showed mildly active colitis (Mayo: 1; Supplementary Figure 3) with histological inflammation (Supplementary Figure 4) throughout the colon. Mesalamine was stopped on day 6 after initiation of FMT. The patient remained in remission throughout FMT therapy (Supplementary Figure 1B). Twenty-five FMT treatments were administered to this patient, and no adverse events were noted. The colon was grossly normal by sigmoidoscopy performed 2 weeks after the final FMT (Mayo 0; Supplementary Figure 3). No evidence of mucosal inflammation in the colon was found by histology (Supplementary Figure 4). This patient remained in remission (PUCAI<10) without any therapy for more than 2 months (80 days after last FMT, 159 days after last 6MP dose). However, he became symptomatic (PUCAI=35) and did not respond to oral mesalamine therapy following this symptom-free period. Pulse steroid treatments were initiated, and he required intermittent low dose steroid therapy with 4-5 week steroid-free intervals. The patient re-enrolled into our FMT trial 1 year afterwards, and is currently in remission off of any therapy following a second course of FMTs for more than 2 months after last FMT with normal fecal calprotectin level.

Patient 3: A 14-year-old female was diagnosed with severely active pancolitis four months prior to enrollment (Mayo 3, Supplementary Figure 3). She could not be weaned off steroids for more than 4 week intervals, and she opted to enroll into the FMT trial. Steroids were tapered during the first 10 days of FMT treatment, and mesalamine was stopped on day 14. She remained in remission during the FMT period (Supplementary Figure 1C). She received 22 rounds of FMT



with only one episode of moderate, self-resolving, positional headache noted. Sigmoidoscopy 2 weeks after the last FMT showed a grossly normal (Mayo 0) colon. No evidence of colonic mucosal inflammation was found by histology. She developed a flare during travel 4 weeks following the last FMT (PUCAI=20). Oral mesalamine successfully induced remission. She repeatedly became symptomatic with bloody stools and cramping (PUCAI=50) 11 weeks (79 days) after the last FMT (105 days after last steroid dose), at which time pulse steroid therapy was initiated. She remained steroid dependent following re-initiation of steroid therapy. The patient re-enrolled into our FMT trial 1 year afterwards, but was withdrawn from the study for worsening symptoms and eventually opted for colectomy after 2 months of steroid therapy.

#### MICROBIOME ANALYSES

Fecal microbiome characterization: Stool samples were processed by the Texas Children's Microbiome Center (Texas Children's Hospital, Houston, TX, USA) for DNA extraction and sequencing. Community DNA was extracted from each specimen using the PowerSoil DNA isolation kit (Mo Bio Laboratories, Carlsbad, CA, USA), following manufacturer's instructions. The resulting DNA was quantified using both a NanoDrop-1000 spectrophotometer (NanoDrop, Wilmington, DE, USA) and Qubit fluorometer (Life Technologies Corporation, Carlsbad, CA, USA). Barcoded universal primers 357F (5'-CCTACGGGAGGCAGCAG-3') and 926R (5'-CCGTCAATTCMTTTRAGT-3') were used to amplify the V3V5 region of the bacterial *16S rRNA* gene. Each library construct was then processed and purified for 454 sequencing. Sequencing was performed on the Roche GS FLX 454 sequencer (454 Life Sciences, Branford, CT, USA).

Data analysis: Sequence data was parsed by barcode and quality filtered using QIIME (version 1.3.0),<sup>5</sup> as implemented in the Genboree Microbiome Toolset.<sup>6</sup> Sequences shorter than 200 bp length, having average quality scores less than 20, harboring ambiguous base calls, or having

mismatches to their barcode or sequencing primer were excluded from further analysis. Both the barcodes and sequencing primers were trimmed away, and the remaining sequences from the donor and patients were pooled and assigned to operational taxonomic units (OTUs) at a similarity cut off of 97% using Cd-hit.<sup>7</sup> The data set was screened for potential chimeras using the ChimeraSlayer algorithm<sup>8</sup>, and all potential chimeras were excluded from downstream analysis. Identities were assigned to each OTU using the Ribosomal Database Project Classifier.<sup>9</sup> Given variation in sequencing depth, the 16S rRNA gene libraries were sub-sampled to an equal depth (i.e., 2600 sequences per library) prior to the evaluation of richness or calculation of diversity indices, including the Shannon diversity index and unweighted UniFrac distance measures. The results from the microbiome characterization of the donor were compared to the microbiome of the patients pre-transplant and at 2-weeks following the end of FMT therapy.

The sequences generated for this project were deposited in the NCBI Sequence Read Archive (SRA) under project accession SRP034948

## RNA SEQUENCING AND ANALYSES

Total RNA was isolated from rectal biopsy specimens (stored in RNALater™ [Ambion through Life Technologies, Carlsbad, California]) according to the manufacturer's recommendation, with Trizol (15596, Life Technologies) and the RNeasy Mini Kit (74106, Qiagen). RNA samples were stored at -80°C until processing for RNA sequencing.

RNA samples from colon biopsies were QCed by spectrophotometry (NanoDrop-1000 Spectrophotometer, Thermo Fisher Scientific, Waltham, MA, U.S.A.) and microfluidic electrophoresis (Experion Automated Electrophoresis System, Bio-Rad Laboratories, Hercules, CA). PolyA-selected libraries were prepared from total RNA samples with TruSeq RNA Sample Preparation Kits (Illumina, San Diego, CA). Cluster generation was performed with Illumina

TruSeq SR Cluster Kits v3 - cBot – HS, in a cBot Cluster Generation System and 100 bp paired-end-sequencing using Illumina TruSeq SBS Kits on an Illumina HiSeq 2000 Sequencing System resulting in mean sequencing depth of 160 million (101-213 million) reads per sample. CASAVA software (Illumina) was used to convert raw read data to fastq format. Sequencing reads were trimmed for quality ( $q < 20$ ) and adapters and then aligned to the human genome (GRCh37/hg19) using Tophat<sup>9</sup>. Cufflinks<sup>10</sup> was used for estimation of transcript abundances based on Fragments Per Kilobase of exon per Million fragments mapped (FPKM). Differential expression analysis was carried out using Cuffdiff, which calculates a test statistic based on the log ratio of a gene's expression in two conditions against the log of one. Multiple testing correction at a false discovery rate  $< 0.05$  was applied to identify differentially expressed genes. The raw data was made publically accessible in Bioproject:

<http://www.ncbi.nlm.nih.gov/bioproject/253048>

## HISTOLOGY

The biopsy specimens were examined by a board-certified pediatric pathologist with expertise in GI pathology who was blinded to previously reported histology reports. The specimens were fixed in 10% neutral buffered formalin immediately following endoscopy. The tissue samples were routinely processed and paraffin embedded. Paraffin sections (3 micron) were cut and stained with hematoxylin and eosin (H&E) with eight tissue sections on one slide. Duplicated 3 micron sections were stained for histone (H3) via immunohistochemistry using a polyclonal rabbit anti-human histone (06-570; Millipore, Billerica, Massachusetts). After pretreatment with HIER1 (Bond Epitope Retrieval Solution 1) for 30 minutes at 100 degrees Fahrenheit, the specimens were incubated with the primary antibody dilution 1:800 at room temperature for 15 minutes. The detection system used was the Novocastra Bond Polymer Refine Detection System (biotin-free, peroxide conjugated) from LEICA, Newcastle upon Tyne, United Kingdom

with diaminobenzidine tetrahydrochloride (DAB) as the chromogen and hematoxylin as the counterstain.

### **STATISTICAL ANALYSES**

The two-tailed paired t-test was used for group comparisons. Significance was relaxed to an arbitrary  $p < 0.25$  for OTU comparisons; otherwise it was determined at  $p < 0.05$ . The Pearson correlation coefficient was calculated in Excel (Microsoft Office Excel 2007). Statistical significance of correlations was calculated with public Statistics Calculator version 3.0 (<http://www.danielsoper.com/statcalc3/calc.aspx?id=44>) and determined at  $p < 0.05$ . See Methods section in Supplementary Appendix for bioinformatic analyses applied to the RNA sequencing data.

## SUPPLEMENTARY TABLES

| #OTU ID | Lowest taxonomic assignment | Before FMT (%) | After FMT (%) | Average change in abundance (%) | Average in donor preparations (%) |
|---------|-----------------------------|----------------|---------------|---------------------------------|-----------------------------------|
| 1179    | Lachnospiraceae             | 1.538          | 6.205         | 4.667                           | 0.404                             |
| 1164    | Lachnospiraceae             | 0.218          | 3.423         | 3.205                           | 0.115                             |
| 1406    | Dorea                       | 0.705          | 3.590         | 2.885                           | 0.096                             |
| 1886    | Lachnospiraceae             | 0.205          | 1.885         | 1.679                           | 0.000                             |
| 1894    | Lachnospiraceae             | 0.038          | 1.474         | 1.436                           | 0.000                             |
| 925     | Ruminococcaceae             | 0.282          | 1.154         | 0.872                           | 0.462                             |
| 1929    | Lachnospiraceae             | 0.013          | 0.410         | 0.397                           | 0.058                             |
| 577     | Faecalibacterium            | 0.000          | 0.321         | 0.321                           | 0.000                             |
| 1094    | Lachnospiraceae             | 0.000          | 0.295         | 0.295                           | 0.000                             |
| 1259    | Ruminococcaceae             | 0.000          | 0.115         | 0.115                           | 0.000                             |
| 1135    | Lachnospiraceae             | 0.000          | 0.064         | 0.064                           | 0.000                             |
| 423     | Collinsella                 | 0.000          | 0.051         | 0.051                           | 0.000                             |
| 1081    | Lachnospiraceae             | 0.000          | 0.051         | 0.051                           | 0.000                             |
| 616     | Ruminococcaceae             | 0.051          | 0.013         | -0.038                          | 0.000                             |
| 1605    | Streptococcus               | 1.244          | 0.192         | -1.051                          | 0.365                             |

**Supplementary Table 1:** Consistent abundance (%) changes in Operational Taxonomic Units (OTUs) with lowest taxonomic assignment in the fecal microbiomes upon the FMT series in all 3 patients. Before and after values are average abundances from the 3 patients before and 2 weeks after the FMTs

| Gene_id         | Gene              | Expression change | q_value |
|-----------------|-------------------|-------------------|---------|
| ENSG00000137757 | FOLH1B            | 0.004             | 0.008   |
| ENSG00000075856 | CXCL5             | 0.010             | 0.000   |
| ENSG00000064607 | FSIP1             | 0.026             | 0.019   |
| ENSG00000026508 | SAA2              | 0.029             | 0.004   |
| ENSG00000069493 | SAA1              | 0.037             | 0.000   |
| ENSG00000121152 | RP11-124L5.7.1    | 0.052             | 0.012   |
| ENSG00000126091 | RC3H2             | 0.083             | 0.013   |
| ENSG00000114742 | TNIP3             | 0.084             | 0.002   |
| ENSG00000065361 | AC027323.1,LYSMD3 | 0.099             | 0.000   |
| ENSG00000131236 | PGLYRP4           | 0.110             | 0.024   |
| ENSG00000075785 | SLC6A20           | 0.169             | 0.001   |
| ENSG00000106392 | TNFSF15           | 0.171             | 0.031   |
| ENSG00000198498 | MTX3              | 0.179             | 0.000   |
| ENSG00000111224 | IL19              | 0.181             | 0.021   |
| ENSG00000113593 | TNFRSF6B          | 0.186             | 0.013   |
| ENSG00000125885 | FPR1              | 0.191             | 0.033   |

|                 |                       |       |       |
|-----------------|-----------------------|-------|-------|
| ENSG00000111711 | ALPL                  | 0.196 | 0.000 |
| ENSG00000196517 | FCGR3B                | 0.197 | 0.025 |
| ENSG00000162747 | AC131025.8.1,MIR143HG | 0.204 | 0.007 |
| ENSG00000141076 | IL6STP1               | 0.206 | 0.032 |
| ENSG00000136824 | RP11-173P15.3.1       | 0.214 | 0.011 |
| ENSG00000130881 | RP11-622O11.2.1       | 0.224 | 0.040 |
| ENSG00000122786 | KCND3                 | 0.229 | 0.001 |
| ENSG00000261804 | MCM10                 | 0.229 | 0.020 |
| ENSG00000108424 | ANKRD36BP1            | 0.231 | 0.003 |
| ENSG00000163482 | AC110491.1            | 0.233 | 0.025 |
| ENSG00000243955 | TFPI2                 | 0.236 | 0.020 |
| ENSG00000173200 | SKA3                  | 0.237 | 0.003 |
| ENSG00000117600 | CREB3L3               | 0.238 | 0.000 |
| ENSG00000184575 | WASF3                 | 0.239 | 0.001 |
| ENSG00000172269 | PHKA1P1               | 0.240 | 0.048 |
| ENSG00000100934 | GPR155                | 0.254 | 0.002 |
| ENSG00000169398 | PRSS21                | 0.258 | 0.042 |
| ENSG00000138780 | TPO                   | 0.259 | 0.038 |
| ENSG00000188529 | THEMIS                | 0.259 | 0.006 |
| ENSG00000214331 | TRIM40                | 0.266 | 0.000 |
| ENSG00000134851 | OLFM4                 | 0.266 | 0.019 |
| ENSG00000149150 | ST3GAL3               | 0.269 | 0.000 |
| ENSG00000165118 | HIN1L.1               | 0.272 | 0.038 |
| ENSG00000104164 | RP11-44F14.2.1        | 0.274 | 0.048 |
| ENSG00000160949 | CXCL1                 | 0.277 | 0.019 |
| ENSG00000109685 | HS3ST2                | 0.281 | 0.000 |
| ENSG00000197056 | CDC7                  | 0.285 | 0.001 |
| ENSG00000165689 | ADAMTS1               | 0.290 | 0.007 |
| ENSG00000103197 | RSAD2                 | 0.292 | 0.003 |
| ENSG00000115159 | PADI1                 | 0.294 | 0.046 |
| ENSG00000090924 | RP11-1220K2.2.1       | 0.297 | 0.010 |
| ENSG00000241878 | ERO1L                 | 0.298 | 0.000 |
| ENSG00000140575 | CDCA2                 | 0.304 | 0.046 |
| ENSG00000160818 | MTF1                  | 0.308 | 0.019 |
| ENSG00000147454 | SHCBP1                | 0.309 | 0.019 |
| ENSG00000188786 | GVINP1                | 0.310 | 0.005 |
| ENSG00000114770 | DDX21                 | 0.311 | 0.006 |
| ENSG00000198373 | RAD54L2               | 0.312 | 0.001 |
| ENSG00000133816 | CXCL3                 | 0.315 | 0.001 |
| ENSG00000221955 | ZBTB41                | 0.318 | 0.002 |
| ENSG00000157349 | WDHD1                 | 0.320 | 0.001 |
| ENSG00000131149 | TRAT1                 | 0.321 | 0.046 |
| ENSG00000183814 | TET3                  | 0.323 | 0.001 |
| ENSG00000077809 | RASGRF2               | 0.326 | 0.036 |
| ENSG00000156990 | ANLN                  | 0.333 | 0.000 |
| ENSG00000104388 | PMAIP1                | 0.334 | 0.027 |
| ENSG00000112812 | XRN1                  | 0.334 | 0.007 |

|                 |                 |       |       |
|-----------------|-----------------|-------|-------|
| ENSG00000156931 | ARPP19          | 0.336 | 0.041 |
| ENSG00000156976 | ATF7IP          | 0.341 | 0.000 |
| ENSG00000113140 | C6orf223        | 0.341 | 0.048 |
| ENSG00000163820 | CTPS            | 0.342 | 0.000 |
| ENSG00000119950 | RP11-356C4.4.1  | 0.344 | 0.034 |
| ENSG00000120756 | FAM111B         | 0.345 | 0.000 |
| ENSG00000087586 | SUV39H2         | 0.346 | 0.002 |
| ENSG00000166912 | CHI3L1          | 0.348 | 0.005 |
| ENSG00000243943 | HAS3            | 0.348 | 0.015 |
| ENSG00000198431 | ENAH            | 0.348 | 0.000 |
| ENSG00000163655 | CALD1           | 0.350 | 0.002 |
| ENSG00000130653 | ORC6            | 0.352 | 0.000 |
| ENSG00000198964 | CDC45           | 0.353 | 0.004 |
| ENSG00000102901 | CD28            | 0.353 | 0.020 |
| ENSG00000107566 | XRCC2           | 0.353 | 0.029 |
| ENSG00000079246 | NAV2            | 0.353 | 0.033 |
| ENSG00000169251 | SOCS3           | 0.355 | 0.033 |
| ENSG00000113240 | FSD1L           | 0.356 | 0.030 |
| ENSG00000122188 | SYNPO2          | 0.357 | 0.000 |
| ENSG00000184220 | RCAN3           | 0.357 | 0.007 |
| ENSG00000021762 | CHEK1           | 0.359 | 0.000 |
| ENSG00000160072 | CASP5           | 0.360 | 0.000 |
| ENSG00000141682 | PRDM1           | 0.361 | 0.000 |
| ENSG00000133789 | SCD             | 0.362 | 0.023 |
| ENSG00000070269 | PTPRC           | 0.365 | 0.000 |
| ENSG00000135829 | FSTL1           | 0.366 | 0.000 |
| ENSG00000163714 | MCM4            | 0.367 | 0.000 |
| ENSG00000175216 | C4BPB           | 0.368 | 0.003 |
| ENSG00000143537 | HELLS           | 0.368 | 0.004 |
| ENSG00000143507 | ACTG2           | 0.371 | 0.001 |
| ENSG00000018699 | DDX3Y           | 0.371 | 0.002 |
| ENSG00000089280 | RP11-343J24.1.1 | 0.373 | 0.015 |
| ENSG00000165480 | CDC25A          | 0.374 | 0.024 |
| ENSG00000176945 | GUCY1A3         | 0.375 | 0.047 |
| ENSG00000164180 | CHL1            | 0.377 | 0.044 |
| ENSG00000101057 | ATM             | 0.378 | 0.002 |
| ENSG00000097046 | ST3GAL1         | 0.378 | 0.006 |
| ENSG00000177192 | CLMP            | 0.379 | 0.040 |
| ENSG00000142224 | RTEL1.1         | 0.380 | 0.000 |
| ENSG00000138074 | CDC6            | 0.385 | 0.030 |
| ENSG00000006652 | RRM2            | 0.385 | 0.000 |
| ENSG00000068438 | ITGAL           | 0.387 | 0.000 |
| ENSG00000154451 | PHIP            | 0.390 | 0.015 |
| ENSG00000100890 | SLFN5           | 0.393 | 0.025 |
| ENSG00000148926 | FCRL1           | 0.393 | 0.000 |
| ENSG00000103111 | SMC4            | 0.394 | 0.000 |
| ENSG00000148308 | MS4A14          | 0.396 | 0.034 |

|                 |                     |       |       |
|-----------------|---------------------|-------|-------|
| ENSG0000086015  | PLEKHH2             | 0.397 | 0.050 |
| ENSG0000055732  | AHR                 | 0.398 | 0.019 |
| ENSG00000105993 | PARP15              | 0.399 | 0.001 |
| ENSG00000146670 | ZFY                 | 0.399 | 0.022 |
| ENSG00000204394 | FAM169A             | 0.400 | 0.014 |
| ENSG00000168488 | CSF3R               | 0.404 | 0.005 |
| ENSG00000116539 | RRM1                | 0.405 | 0.000 |
| ENSG00000111912 | RGS5                | 0.405 | 0.005 |
| ENSG00000166923 | CDCA5               | 0.406 | 0.007 |
| ENSG00000137497 | SLC7A6              | 0.406 | 0.000 |
| ENSG00000170581 | RP4-788L13.1.1      | 0.408 | 0.019 |
| ENSG00000121281 | CTDSPL2             | 0.409 | 0.012 |
| ENSG00000094841 | ATAD2               | 0.411 | 0.024 |
| ENSG00000129422 | NF1                 | 0.411 | 0.000 |
| ENSG00000114127 | CENPK               | 0.412 | 0.000 |
| ENSG00000160796 | GREM1               | 0.412 | 0.000 |
| ENSG00000091436 | IL1RN               | 0.413 | 0.008 |
| ENSG00000171051 | KIT                 | 0.413 | 0.042 |
| ENSG00000177034 | SLC38A7             | 0.416 | 0.027 |
| ENSG00000105483 | LMO7                | 0.417 | 0.000 |
| ENSG00000174574 | BIRC3               | 0.417 | 0.000 |
| ENSG00000082153 | MS4A1               | 0.419 | 0.000 |
| ENSG00000164244 | BLM                 | 0.419 | 0.013 |
| ENSG00000134369 | SPAG9               | 0.420 | 0.004 |
| ENSG00000152455 | RTEL1,TNFRSF6B      | 0.423 | 0.014 |
| ENSG00000117228 | RP11-904M10.1.1     | 0.424 | 0.017 |
| ENSG00000136560 | GBP5                | 0.424 | 0.000 |
| ENSG00000204120 | ZNF169              | 0.424 | 0.011 |
| ENSG00000168071 | NEDD1               | 0.426 | 0.000 |
| ENSG00000169679 | KIF18B              | 0.426 | 0.003 |
| ENSG00000157212 | FAM55B              | 0.427 | 0.004 |
| ENSG00000164649 | CTA-286B10.7.1,MCM5 | 0.427 | 0.000 |
| ENSG00000196873 | MEF2C               | 0.427 | 0.010 |
| ENSG00000123562 | MEST                | 0.427 | 0.000 |
| ENSG00000163017 | TXNRD1              | 0.428 | 0.000 |
| ENSG00000177888 | PDP1                | 0.428 | 0.046 |
| ENSG00000250251 | REL                 | 0.428 | 0.020 |
| ENSG00000198121 | C3orf26             | 0.428 | 0.001 |
| ENSG00000112701 | DHFR                | 0.431 | 0.012 |
| ENSG00000013561 | FCRL3               | 0.431 | 0.016 |
| ENSG00000163519 | MCM6                | 0.432 | 0.002 |
| ENSG00000092439 | B3GALT1             | 0.434 | 0.000 |
| ENSG00000131504 | NCOA7,RP11-73O6.4.1 | 0.437 | 0.000 |
| ENSG00000132466 | GBP1                | 0.439 | 0.001 |
| ENSG00000148175 | TRANK1              | 0.439 | 0.003 |
| ENSG00000138398 | DOCK2               | 0.440 | 0.006 |
| ENSG00000118495 | SMC1A               | 0.442 | 0.002 |



|                 |           |       |       |
|-----------------|-----------|-------|-------|
| ENSG00000167522 | PARP11    | 0.442 | 0.003 |
| ENSG00000086666 | SLFN13    | 0.442 | 0.002 |
| ENSG00000140403 | KYNU      | 0.443 | 0.025 |
| ENSG00000166927 | NCAPG     | 0.443 | 0.007 |
| ENSG00000182866 | ACSL4     | 0.443 | 0.036 |
| ENSG00000215837 | BANK1     | 0.444 | 0.013 |
| ENSG00000138032 | NFAT5     | 0.449 | 0.013 |
| ENSG00000132142 | CYR61     | 0.450 | 0.010 |
| ENSG00000104205 | TLE4      | 0.451 | 0.009 |
| ENSG00000143297 | RNASEH1   | 0.451 | 0.000 |
| ENSG00000163635 | PRKAA1    | 0.452 | 0.001 |
| ENSG00000138764 | GSTCD     | 0.452 | 0.030 |
| ENSG00000099917 | SCFD2     | 0.454 | 0.026 |
| ENSG00000143811 | HEG1      | 0.455 | 0.047 |
| ENSG00000204713 | SVEP1     | 0.456 | 0.025 |
| ENSG00000159618 | CEP135    | 0.456 | 0.006 |
| ENSG00000175643 | MCM8      | 0.456 | 0.000 |
| ENSG00000135486 | GART      | 0.456 | 0.000 |
| ENSG00000124839 | AKAP2     | 0.457 | 0.037 |
| ENSG00000143337 | S1PR1     | 0.459 | 0.021 |
| ENSG00000166411 | DEK       | 0.459 | 0.000 |
| ENSG00000196159 | LCP1      | 0.460 | 0.005 |
| ENSG00000145041 | ATXN7     | 0.460 | 0.022 |
| ENSG00000214262 | CIITA     | 0.461 | 0.001 |
| ENSG00000213430 | LONP2     | 0.461 | 0.000 |
| ENSG00000079385 | IL7R      | 0.461 | 0.035 |
| ENSG00000168610 | KIF24     | 0.462 | 0.041 |
| ENSG00000140968 | DUSP10    | 0.463 | 0.002 |
| ENSG00000136699 | SSX2IP    | 0.463 | 0.000 |
| ENSG00000049130 | PDE7A     | 0.464 | 0.000 |
| ENSG00000140395 | ACACA     | 0.465 | 0.001 |
| ENSG00000100030 | SAMD4A    | 0.466 | 0.010 |
| ENSG00000106546 | GTPBP1    | 0.466 | 0.002 |
| ENSG00000110104 | CFB       | 0.467 | 0.000 |
| ENSG00000170144 | CIRH1A    | 0.467 | 0.000 |
| ENSG00000140263 | MCM2      | 0.469 | 0.001 |
| ENSG00000013503 | CTTNBP2NL | 0.469 | 0.003 |
| ENSG00000113368 | ITGA4     | 0.469 | 0.028 |
| ENSG00000065328 | IMPAD1    | 0.469 | 0.048 |
| ENSG00000122420 | MSH6      | 0.470 | 0.004 |
| ENSG00000182271 | SNHG3     | 0.470 | 0.020 |
| ENSG00000154153 | RFC5      | 0.471 | 0.000 |
| ENSG00000077147 | LMNB1     | 0.471 | 0.000 |
| ENSG00000005483 | DAPP1     | 0.472 | 0.000 |
| ENSG00000172673 | DIAPH3    | 0.473 | 0.004 |
| ENSG00000138772 | PCGF3     | 0.473 | 0.034 |
| ENSG00000256364 | GPRIN1    | 0.473 | 0.009 |

|                 |                 |       |       |
|-----------------|-----------------|-------|-------|
| ENSG00000127603 | KITLG           | 0.474 | 0.029 |
| ENSG00000147649 | STARD4          | 0.474 | 0.003 |
| ENSG00000095564 | WDR43           | 0.474 | 0.005 |
| ENSG00000198901 | NUP107          | 0.474 | 0.000 |
| ENSG00000115282 | FILIP1L         | 0.475 | 0.041 |
| ENSG00000081026 | GNL3L           | 0.475 | 0.001 |
| ENSG00000116649 | CNN1            | 0.475 | 0.000 |
| ENSG00000024526 | MAVS            | 0.475 | 0.006 |
| ENSG00000134453 | LIN9            | 0.477 | 0.000 |
| ENSG00000232882 | NT5C2           | 0.477 | 0.007 |
| ENSG00000157827 | ADCY7           | 0.478 | 0.019 |
| ENSG00000114346 | RP11-252A24.2.1 | 0.479 | 0.046 |
| ENSG00000102837 | FGD2            | 0.479 | 0.000 |
| ENSG00000160688 | TMEM97          | 0.479 | 0.000 |
| ENSG00000140718 | RAD51AP1        | 0.480 | 0.003 |
| ENSG00000154237 | WDFY1           | 0.482 | 0.034 |
| ENSG00000198554 | NBPF8           | 0.483 | 0.048 |
| ENSG00000156804 | CDK1            | 0.484 | 0.043 |
| ENSG00000139641 | TCF7            | 0.485 | 0.013 |
| ENSG00000160703 | LYN             | 0.485 | 0.025 |
| ENSG00000105568 | LEF1            | 0.485 | 0.027 |
| ENSG00000162599 | FCGR3A          | 0.486 | 0.000 |
| ENSG00000172318 | FAM55C          | 0.486 | 0.011 |
| ENSG00000090316 | EPB41L2         | 0.486 | 0.000 |
| ENSG00000085449 | MAP3K8          | 0.487 | 0.037 |
| ENSG00000109919 | TEAD4           | 0.487 | 0.002 |
| ENSG00000145908 | NPAS2           | 0.487 | 0.002 |
| ENSG00000130826 | RMI2            | 0.488 | 0.017 |
| ENSG00000206053 | NOLC1           | 0.488 | 0.027 |
| ENSG00000197905 | EHF             | 0.488 | 0.034 |
| ENSG00000179978 | RALGPS2         | 0.489 | 0.025 |
| ENSG00000115239 | USP45           | 0.489 | 0.021 |
| ENSG00000139842 | PHF20L1         | 0.489 | 0.002 |
| ENSG00000125962 | RAB5B           | 0.489 | 0.012 |
| ENSG00000196584 | SERPINE2        | 0.489 | 0.000 |
| ENSG00000162692 | AASS            | 0.489 | 0.034 |
| ENSG00000181163 | SGK3            | 0.490 | 0.004 |
| ENSG00000172403 | TNPO1           | 0.490 | 0.003 |
| ENSG00000256667 | PRRC2B          | 0.490 | 0.000 |
| ENSG00000102606 | FGR             | 0.491 | 0.000 |
| ENSG00000136167 | JAK3            | 0.491 | 0.022 |
| ENSG00000168685 | SMC2            | 0.491 | 0.000 |
| ENSG00000079819 | MSL2            | 0.492 | 0.045 |
| ENSG00000109084 | RPS6KA3         | 0.492 | 0.035 |
| ENSG00000237683 | BUB1            | 0.492 | 0.006 |
| ENSG00000128928 | RP11-261C10.3.1 | 0.493 | 0.023 |
| ENSG00000168016 | RAPGEF2         | 0.493 | 0.022 |

|                 |              |       |       |
|-----------------|--------------|-------|-------|
| ENSG0000006744  | ARHGAP11A    | 0.494 | 0.045 |
| ENSG00000136286 | RACGAP1      | 0.494 | 0.017 |
| ENSG00000072501 | MCOLN3       | 0.494 | 0.008 |
| ENSG00000166197 | MYBL2        | 0.494 | 0.041 |
| ENSG00000116353 | SEC23A       | 0.495 | 0.003 |
| ENSG00000163735 | PNPT1        | 0.495 | 0.000 |
| ENSG00000088247 | HAPLN3       | 0.496 | 0.031 |
| ENSG00000093009 | ECT2         | 0.496 | 0.000 |
| ENSG00000146192 | DYNC1LI2     | 0.496 | 0.005 |
| ENSG00000196712 | POLD3        | 0.496 | 0.005 |
| ENSG00000138756 | NAV1         | 0.497 | 0.027 |
| ENSG00000137824 | PLS1         | 0.497 | 0.001 |
| ENSG00000143033 | SLC5A6       | 0.497 | 0.000 |
| ENSG00000137770 | HERC3        | 0.498 | 0.012 |
| ENSG00000132356 | ARHGAP42     | 0.498 | 0.002 |
| ENSG00000132780 | COL12A1      | 0.498 | 0.048 |
| ENSG00000029363 | LILRB1       | 0.499 | 0.015 |
| ENSG00000112096 | AC013461.1.1 | 0.499 | 0.049 |
| ENSG00000115919 | PKD1P6       | 0.500 | 0.019 |
| ENSG00000137504 | SECISBP2L    | 0.500 | 0.011 |
| ENSG00000126226 | RFC4         | 0.501 | 0.000 |
| ENSG00000203710 | MGA          | 0.501 | 0.003 |
| ENSG00000145725 | GLIPR1       | 0.501 | 0.022 |
| ENSG00000136319 | BCLAF1       | 0.501 | 0.000 |
| ENSG00000073417 | PLDN         | 0.502 | 0.006 |
| ENSG00000080189 | PFAS         | 0.503 | 0.000 |
| ENSG00000130723 | FTO          | 0.503 | 0.027 |
| ENSG00000164506 | GEN1         | 0.504 | 0.000 |
| ENSG00000177479 | UBQLN1       | 0.504 | 0.004 |
| ENSG00000166803 | EXOC5        | 0.504 | 0.009 |
| ENSG00000114857 | SLAMF1       | 0.505 | 0.001 |
| ENSG00000171385 | STOM         | 0.505 | 0.015 |
| ENSG00000049449 | YIPF6        | 0.506 | 0.034 |
| ENSG00000093183 | FBXO32       | 0.506 | 0.000 |
| ENSG00000259141 | LMBR1        | 0.508 | 0.004 |
| ENSG00000138795 | GPD2         | 0.508 | 0.048 |
| ENSG00000168918 | PLEKHG2      | 0.508 | 0.007 |
| ENSG00000197157 | POLK         | 0.508 | 0.000 |
| ENSG00000203879 | TTC5         | 0.509 | 0.008 |
| ENSG00000163734 | ZNF268       | 0.509 | 0.000 |
| ENSG00000135316 | PRKD3        | 0.512 | 0.036 |
| ENSG00000257743 | WDR76        | 0.512 | 0.012 |
| ENSG00000115232 | TAF1A        | 0.513 | 0.019 |
| ENSG00000116521 | CD44         | 0.513 | 0.000 |
| ENSG00000104331 | PBK          | 0.513 | 0.008 |
| ENSG00000145734 | FAM126B      | 0.514 | 0.024 |
| ENSG00000095739 | DES          | 0.514 | 0.000 |

|                 |            |       |       |
|-----------------|------------|-------|-------|
| ENSG00000119408 | C12orf48   | 0.514 | 0.001 |
| ENSG00000198663 | WDR62      | 0.514 | 0.034 |
| ENSG00000175376 | NR2C2      | 0.515 | 0.007 |
| ENSG00000186998 | ZEB2       | 0.515 | 0.031 |
| ENSG00000155324 | TTC27      | 0.515 | 0.042 |
| ENSG00000179820 | HPRT1      | 0.516 | 0.015 |
| ENSG00000166012 | STK38L     | 0.516 | 0.019 |
| ENSG00000256269 | AC093510.2 | 0.516 | 0.021 |
| ENSG00000153395 | CEP350     | 0.518 | 0.001 |
| ENSG00000116062 | IL10RA     | 0.518 | 0.033 |
| ENSG00000160828 | COL8A2     | 0.518 | 0.022 |
| ENSG00000050426 | HN1L       | 0.518 | 0.002 |
| ENSG00000137801 | GPRC5A     | 0.518 | 0.000 |
| ENSG00000178295 | CLEC2D     | 0.518 | 0.007 |
| ENSG00000093167 | HECTD2     | 0.519 | 0.000 |
| ENSG00000197343 | KDM2B      | 0.519 | 0.030 |
| ENSG00000155545 | CELF1      | 0.519 | 0.022 |
| ENSG00000112297 | LRRK2      | 0.520 | 0.019 |
| ENSG00000139197 | RAD54L     | 0.521 | 0.007 |
| ENSG00000198826 | FAT4       | 0.521 | 0.003 |
| ENSG00000100376 | CR1        | 0.522 | 0.002 |
| ENSG00000177853 | NAMPTL     | 0.522 | 0.028 |
| ENSG00000112739 | BMP2K      | 0.523 | 0.026 |
| ENSG00000176619 | MAN2A2     | 0.524 | 0.000 |
| ENSG00000008513 | GTF2I      | 0.524 | 0.006 |
| ENSG00000221914 | C1GALT1    | 0.524 | 0.000 |
| ENSG00000163755 | MYADM      | 0.524 | 0.000 |
| ENSG00000137804 | TRIB2      | 0.524 | 0.000 |
| ENSG00000230724 | STAT1      | 0.525 | 0.006 |
| ENSG00000047457 | SENP2      | 0.525 | 0.004 |
| ENSG00000159131 | KLHL29     | 0.526 | 0.000 |
| ENSG00000167325 | RASGRP4    | 0.526 | 0.019 |
| ENSG00000186638 | CAND1      | 0.526 | 0.000 |
| ENSG00000134121 | BZW1       | 0.526 | 0.006 |
| ENSG00000005844 | TONSL      | 0.527 | 0.008 |
| ENSG00000071127 | PALLD      | 0.528 | 0.006 |
| ENSG00000003402 | ETNK1      | 0.528 | 0.036 |
| ENSG00000165792 | INVS       | 0.528 | 0.003 |
| ENSG00000104738 | FAM118A    | 0.528 | 0.000 |
| ENSG00000144580 | PUS1       | 0.529 | 0.000 |
| ENSG00000138185 | NCAPD2     | 0.529 | 0.021 |
| ENSG00000105639 | HSPD1P1    | 0.529 | 0.007 |
| ENSG00000122512 | PRMT3      | 0.530 | 0.000 |
| ENSG00000140829 | MTR        | 0.532 | 0.001 |
| ENSG00000090060 | XPO4       | 0.532 | 0.032 |
| ENSG00000197170 | DDX11      | 0.533 | 0.000 |
| ENSG00000118855 | FGFR1      | 0.534 | 0.016 |

|                 |          |       |       |
|-----------------|----------|-------|-------|
| ENSG00000135968 | HMG20A   | 0.534 | 0.001 |
| ENSG00000143079 | GCC2     | 0.535 | 0.001 |
| ENSG00000114026 | LPCAT1   | 0.535 | 0.000 |
| ENSG00000188807 | CAPRIN1  | 0.535 | 0.000 |
| ENSG00000163918 | NCAPH    | 0.535 | 0.031 |
| ENSG00000159176 | SLC25A37 | 0.536 | 0.004 |
| ENSG00000198586 | FMR1     | 0.536 | 0.000 |
| ENSG00000205336 | TYMS     | 0.536 | 0.013 |
| ENSG00000163832 | NFKBIZ   | 0.537 | 0.000 |
| ENSG00000184863 | TPD52L1  | 0.538 | 0.039 |
| ENSG00000143375 | IPO11    | 0.538 | 0.035 |
| ENSG00000165732 | PPP1R12A | 0.538 | 0.000 |
| ENSG00000182541 | MTUS1    | 0.539 | 0.000 |
| ENSG00000092201 | WARS     | 0.539 | 0.001 |
| ENSG00000111206 | RPS6KB1  | 0.539 | 0.013 |
| ENSG00000050730 | NKTR     | 0.540 | 0.000 |
| ENSG00000205583 | MLLT6    | 0.540 | 0.009 |
| ENSG00000113810 | ZDHHC8   | 0.543 | 0.035 |
| ENSG00000167775 | ABCC5    | 0.544 | 0.002 |
| ENSG00000107625 | DCLRE1B  | 0.544 | 0.005 |
| ENSG00000056097 | CCP110   | 0.544 | 0.017 |
| ENSG00000196547 | UBE2T    | 0.545 | 0.036 |
| ENSG00000144231 | TOR1AIP1 | 0.545 | 0.000 |
| ENSG00000013573 | PPIP5K2  | 0.545 | 0.020 |
| ENSG00000137267 | MLL5     | 0.545 | 0.000 |
| ENSG00000171681 | SLC10A7  | 0.546 | 0.000 |
| ENSG00000040341 | SCLY     | 0.547 | 0.038 |
| ENSG00000135919 | HBS1L    | 0.547 | 0.000 |
| ENSG00000173276 | HYAL1    | 0.548 | 0.024 |
| ENSG00000117155 | GNAI1    | 0.548 | 0.044 |
| ENSG00000135720 | PPP2R1B  | 0.548 | 0.002 |
| ENSG00000177189 | MAPK1    | 0.548 | 0.036 |
| ENSG00000102908 | NFIX     | 0.548 | 0.022 |
| ENSG00000073921 | EIF1AY   | 0.549 | 0.034 |
| ENSG00000105221 | DPH2     | 0.549 | 0.000 |
| ENSG00000132970 | ABI3BP   | 0.550 | 0.014 |
| ENSG00000082213 | PARP14   | 0.550 | 0.023 |
| ENSG00000043462 | KBTBD2   | 0.550 | 0.007 |
| ENSG00000144802 | XRCC5    | 0.550 | 0.000 |
| ENSG00000149269 | BOP1     | 0.551 | 0.045 |
| ENSG00000165124 | ASH1L    | 0.551 | 0.044 |
| ENSG00000117335 | DKC1     | 0.551 | 0.009 |
| ENSG00000119535 | NMD3     | 0.552 | 0.001 |
| ENSG00000165895 | GLS      | 0.553 | 0.001 |
| ENSG00000115364 | KIAA1530 | 0.553 | 0.019 |
| ENSG00000122008 | MFN1     | 0.554 | 0.043 |
| ENSG00000103202 | CP       | 0.555 | 0.035 |

|                 |          |       |       |
|-----------------|----------|-------|-------|
| ENSG00000100852 | MS4A7    | 0.555 | 0.011 |
| ENSG00000111530 | PTGFR    | 0.555 | 0.001 |
| ENSG00000167491 | CORO1C   | 0.555 | 0.032 |
| ENSG00000138768 | TCHP     | 0.555 | 0.032 |
| ENSG00000196696 | ANKRD17  | 0.555 | 0.050 |
| ENSG00000144852 | WEE1     | 0.555 | 0.004 |
| ENSG00000129116 | WDR1     | 0.557 | 0.004 |
| ENSG00000227018 | PDLIM5   | 0.557 | 0.002 |
| ENSG00000132768 | SLC6A9   | 0.558 | 0.037 |
| ENSG00000164116 | CLSTN3   | 0.558 | 0.015 |
| ENSG00000154760 | FAM86A   | 0.558 | 0.001 |
| ENSG00000160593 | MCM3     | 0.559 | 0.003 |
| ENSG00000071575 | KIAA0101 | 0.559 | 0.000 |
| ENSG00000130227 | PBX3     | 0.559 | 0.005 |
| ENSG00000225241 | FAM129C  | 0.559 | 0.000 |
| ENSG00000129292 | SOD2     | 0.559 | 0.014 |
| ENSG00000111737 | ATL2     | 0.559 | 0.000 |
| ENSG00000203747 | SORD     | 0.560 | 0.008 |
| ENSG00000133835 | PLXDC1   | 0.560 | 0.002 |
| ENSG00000125730 | DDX18    | 0.561 | 0.024 |
| ENSG00000204614 | SCAMP5   | 0.562 | 0.041 |
| ENSG00000112282 | RABL3    | 0.562 | 0.014 |
| ENSG00000068308 | NFATC2IP | 0.562 | 0.000 |
| ENSG00000138035 | TMPO     | 0.563 | 0.014 |
| ENSG00000111011 | XPOT     | 0.564 | 0.045 |
| ENSG00000162551 | ADAM10   | 0.564 | 0.030 |
| ENSG00000159140 | SREK1    | 0.564 | 0.001 |
| ENSG00000118894 | LCP2     | 0.565 | 0.031 |
| ENSG00000135387 | SF3B3    | 0.565 | 0.000 |
| ENSG00000103044 | MTDH     | 0.566 | 0.001 |
| ENSG00000120802 | GOLT1B   | 0.568 | 0.028 |
| ENSG00000117523 | CDCA7L   | 0.568 | 0.000 |
| ENSG00000121749 | WHSC1    | 0.568 | 0.029 |
| ENSG00000174799 | SLC43A1  | 0.569 | 0.033 |
| ENSG00000139190 | STAT3    | 0.569 | 0.006 |
| ENSG00000177426 | GNA12    | 0.569 | 0.000 |
| ENSG00000137752 | SLC38A5  | 0.570 | 0.006 |
| ENSG00000176142 | DIAPH1   | 0.570 | 0.000 |
| ENSG00000154175 | VRK2     | 0.570 | 0.000 |
| ENSG00000184163 | FOXM1    | 0.571 | 0.032 |
| ENSG00000125107 | GNPDA2   | 0.571 | 0.004 |
| ENSG00000154096 | TMEM201  | 0.572 | 0.002 |
| ENSG00000139163 | BTN3A3   | 0.572 | 0.002 |
| ENSG00000139182 | KPNB1    | 0.572 | 0.005 |
| ENSG00000163608 | LIN54    | 0.573 | 0.000 |
| ENSG00000057252 | TMEM39A  | 0.573 | 0.004 |
| ENSG00000163534 | SMC6     | 0.574 | 0.003 |

|                 |                 |       |       |
|-----------------|-----------------|-------|-------|
| ENSG00000163935 | C9orf64         | 0.574 | 0.039 |
| ENSG00000108039 | NFIA            | 0.575 | 0.000 |
| ENSG00000164045 | POLR1B          | 0.575 | 0.041 |
| ENSG00000086200 | CALU            | 0.575 | 0.013 |
| ENSG00000170485 | VAMP1           | 0.576 | 0.032 |
| ENSG00000135373 | ACSL3           | 0.576 | 0.000 |
| ENSG00000114867 | GMPS            | 0.576 | 0.001 |
| ENSG00000088833 | MORF4L2         | 0.576 | 0.000 |
| ENSG00000008294 | MIER3           | 0.576 | 0.000 |
| ENSG00000131018 | KIF16B          | 0.577 | 0.046 |
| ENSG00000139218 | RAP1GDS1        | 0.577 | 0.000 |
| ENSG00000144283 | ZZZ3            | 0.578 | 0.001 |
| ENSG00000134086 | TTF2            | 0.578 | 0.041 |
| ENSG00000154734 | FAM111A         | 0.579 | 0.000 |
| ENSG00000070367 | MTF2            | 0.579 | 0.000 |
| ENSG00000243716 | VCAM1           | 0.579 | 0.030 |
| ENSG00000010322 | EXOSC2          | 0.580 | 0.000 |
| ENSG00000151914 | USP53           | 0.580 | 0.000 |
| ENSG00000163386 | SPN             | 0.580 | 0.043 |
| ENSG00000114745 | INPP5D          | 0.580 | 0.002 |
| ENSG00000114650 | RP11-368J21.2.1 | 0.581 | 0.008 |
| ENSG00000155229 | BTAF1           | 0.581 | 0.000 |
| ENSG00000107968 | EVL             | 0.581 | 0.001 |
| ENSG00000168209 | NPM1            | 0.581 | 0.003 |
| ENSG00000163904 | PEA15           | 0.581 | 0.025 |
| ENSG00000119397 | HSD17B12        | 0.582 | 0.034 |
| ENSG00000198780 | NUSAP1          | 0.582 | 0.028 |
| ENSG00000172890 | BDP1            | 0.582 | 0.000 |
| ENSG00000178921 | HPSE            | 0.582 | 0.001 |
| ENSG00000217128 | ATP2A2          | 0.582 | 0.000 |
| ENSG00000101557 | ZNF518A         | 0.583 | 0.020 |
| ENSG00000150093 | C12orf29        | 0.584 | 0.003 |
| ENSG00000124508 | ATAD3B          | 0.584 | 0.000 |
| ENSG00000092470 | RQCD1           | 0.584 | 0.002 |
| ENSG00000076003 | ARIH2           | 0.584 | 0.000 |
| ENSG00000119777 | TACC3           | 0.585 | 0.000 |
| ENSG00000136653 | SOAT1           | 0.585 | 0.000 |
| ENSG00000139278 | AKAP12          | 0.586 | 0.001 |
| ENSG00000259131 | HMBS            | 0.586 | 0.003 |
| ENSG00000138434 | STAG3L2         | 0.587 | 0.000 |
| ENSG00000145675 | ASRGL1          | 0.587 | 0.000 |
| ENSG00000089335 | ERLIN1          | 0.588 | 0.001 |
| ENSG00000173706 | C4orf43         | 0.588 | 0.027 |
| ENSG00000166250 | PIK3R1          | 0.589 | 0.010 |
| ENSG00000171865 | MICAL2          | 0.590 | 0.038 |
| ENSG00000174720 | USP14           | 0.590 | 0.006 |
| ENSG00000146535 | CEP164          | 0.590 | 0.021 |

|                 |                |       |       |
|-----------------|----------------|-------|-------|
| ENSG00000162174 | ATG4C          | 0.591 | 0.004 |
| ENSG00000237289 | MLLT4          | 0.591 | 0.000 |
| ENSG00000080603 | RBBP8          | 0.591 | 0.000 |
| ENSG00000087266 | ANKRD11        | 0.592 | 0.017 |
| ENSG00000119402 | KHSRP          | 0.592 | 0.001 |
| ENSG00000119318 | C4orf46        | 0.592 | 0.007 |
| ENSG00000113328 | GPAM           | 0.593 | 0.012 |
| ENSG00000067646 | RP11-304M2.2.1 | 0.593 | 0.007 |
| ENSG00000134283 | MYO19          | 0.593 | 0.013 |
| ENSG00000153914 | GPCPD1         | 0.594 | 0.000 |
| ENSG00000142623 | STK36          | 0.594 | 0.010 |
| ENSG00000152527 | CD8A           | 0.594 | 0.002 |
| ENSG00000118655 | ITGB1          | 0.594 | 0.045 |
| ENSG00000137845 | TMEM62         | 0.595 | 0.002 |
| ENSG00000100897 | G3BP1          | 0.595 | 0.028 |
| ENSG00000198794 | TM9SF3         | 0.595 | 0.034 |
| ENSG00000133884 | KLHDC4         | 0.595 | 0.010 |
| ENSG00000111445 | TMEM165        | 0.596 | 0.007 |
| ENSG00000102854 | MACF1          | 0.596 | 0.000 |
| ENSG00000028116 | MAP4           | 0.597 | 0.000 |
| ENSG00000118976 | SYNCRIP        | 0.597 | 0.012 |
| ENSG00000008311 | STAU2          | 0.597 | 0.025 |
| ENSG00000146247 | VAR5           | 0.598 | 0.000 |
| ENSG00000099904 | IFNAR1         | 0.598 | 0.022 |
| ENSG00000170275 | SRRM1          | 0.598 | 0.000 |
| ENSG00000135624 | IARS           | 0.598 | 0.006 |
| ENSG00000165055 | LGALS8         | 0.598 | 0.000 |
| ENSG00000156738 | ADM            | 0.599 | 0.000 |
| ENSG00000160856 | PAXIP1         | 0.599 | 0.033 |
| ENSG00000138593 | EIF5           | 0.599 | 0.000 |
| ENSG00000142949 | UEVLD          | 0.599 | 0.001 |
| ENSG00000149743 | U2SURP         | 0.599 | 0.000 |
| ENSG00000144848 | HSD17B4        | 0.600 | 0.004 |
| ENSG00000043514 | SEC24D         | 0.600 | 0.000 |
| ENSG00000145781 | STXBP5         | 0.601 | 0.049 |
| ENSG00000095787 | HPS3           | 0.601 | 0.001 |
| ENSG00000184661 | SENP6          | 0.602 | 0.000 |
| ENSG00000184557 | GPATCH4        | 0.602 | 0.001 |
| ENSG00000117481 | PLAA           | 0.602 | 0.013 |
| ENSG00000076685 | TNFAIP3        | 0.603 | 0.029 |
| ENSG00000121067 | KDM5D          | 0.603 | 0.030 |
| ENSG00000173083 | LAX1           | 0.603 | 0.000 |
| ENSG00000149187 | FMNL2          | 0.604 | 0.000 |
| ENSG00000100226 | SGMS1          | 0.604 | 0.001 |
| ENSG00000149182 | CCNT2          | 0.604 | 0.000 |
| ENSG00000164080 | SPARC          | 0.605 | 0.000 |
| ENSG00000143753 | ANKRD49        | 0.605 | 0.000 |



|                 |            |       |       |
|-----------------|------------|-------|-------|
| ENSG00000117090 | SMG7       | 0.606 | 0.000 |
| ENSG00000111581 | SNX19      | 0.606 | 0.008 |
| ENSG00000214135 | DNAJA4     | 0.606 | 0.001 |
| ENSG00000052126 | ZAP70      | 0.608 | 0.000 |
| ENSG00000135164 | FERMT1     | 0.608 | 0.002 |
| ENSG00000245164 | VPS8       | 0.609 | 0.034 |
| ENSG00000150961 | PAK1       | 0.610 | 0.000 |
| ENSG00000204256 | GTF2H2     | 0.610 | 0.012 |
| ENSG00000163328 | SP4        | 0.610 | 0.017 |
| ENSG00000109920 | DDIT4      | 0.610 | 0.003 |
| ENSG00000170266 | PMS2       | 0.611 | 0.000 |
| ENSG00000138698 | MYO1G      | 0.611 | 0.000 |
| ENSG00000184162 | SSFA2      | 0.611 | 0.031 |
| ENSG00000112699 | EI24       | 0.611 | 0.000 |
| ENSG00000091651 | MSTO1      | 0.612 | 0.001 |
| ENSG00000013588 | ZNF567     | 0.612 | 0.025 |
| ENSG00000133641 | HLA-DQB1   | 0.612 | 0.018 |
| ENSG00000174827 | CLK4       | 0.612 | 0.003 |
| ENSG00000108443 | ESYT1      | 0.612 | 0.005 |
| ENSG00000127955 | TRPM7      | 0.613 | 0.012 |
| ENSG00000187147 | ITGA6      | 0.613 | 0.004 |
| ENSG00000211455 | CDCA7      | 0.614 | 0.001 |
| ENSG00000157404 | ATAD3A     | 0.614 | 0.000 |
| ENSG00000081059 | DNM1L      | 0.614 | 0.004 |
| ENSG00000180771 | PISD       | 0.614 | 0.000 |
| ENSG00000148187 | CARD8      | 0.615 | 0.005 |
| ENSG00000149636 | FBXW2      | 0.615 | 0.000 |
| ENSG00000100664 | PLCB2      | 0.615 | 0.044 |
| ENSG00000133048 | CSNK1G3    | 0.615 | 0.006 |
| ENSG00000134255 | AC138035.1 | 0.616 | 0.006 |
| ENSG00000082458 | DFFA       | 0.617 | 0.016 |
| ENSG00000205268 | SEC22C     | 0.618 | 0.041 |
| ENSG00000168958 | PRC1       | 0.618 | 0.020 |
| ENSG00000099194 | CCDC86     | 0.618 | 0.000 |
| ENSG00000198692 | ZNF92      | 0.618 | 0.000 |
| ENSG00000089177 | CGGBP1     | 0.618 | 0.026 |
| ENSG00000083099 | DHX9       | 0.618 | 0.000 |
| ENSG00000078668 | NOP58      | 0.619 | 0.014 |
| ENSG00000189042 | TFDP1      | 0.620 | 0.005 |
| ENSG00000115705 | DDX50      | 0.620 | 0.041 |
| ENSG00000114378 | PPHLN1     | 0.620 | 0.000 |
| ENSG00000110274 | ABCB8      | 0.620 | 0.000 |
| ENSG00000198951 | PRRC2C     | 0.620 | 0.003 |
| ENSG00000101773 | SCAF11     | 0.621 | 0.006 |
| ENSG00000139734 | SWAP70     | 0.621 | 0.004 |
| ENSG00000189091 | DEPDC1     | 0.621 | 0.019 |
| ENSG00000112339 | AEBP2      | 0.622 | 0.001 |

|                 |         |       |       |
|-----------------|---------|-------|-------|
| ENSG0000006194  | IVD     | 0.622 | 0.048 |
| ENSG00000125630 | POLR3B  | 0.622 | 0.038 |
| ENSG00000154814 | CBWD3   | 0.623 | 0.048 |
| ENSG00000139546 | LCK     | 0.623 | 0.026 |
| ENSG00000145736 | EIF1AD  | 0.623 | 0.025 |
| ENSG00000142910 | VEZT    | 0.623 | 0.000 |
| ENSG00000138081 | POLR3E  | 0.623 | 0.032 |
| ENSG00000153064 | PAPOLA  | 0.624 | 0.009 |
| ENSG00000110696 | SET     | 0.624 | 0.021 |
| ENSG00000183010 | CNTRL   | 0.624 | 0.003 |
| ENSG00000169032 | HNRNPA3 | 0.625 | 0.000 |
| ENSG00000136689 | PPIG    | 0.625 | 0.000 |
| ENSG00000138964 | SDCCAG3 | 0.626 | 0.008 |
| ENSG00000249669 | OGG1    | 0.626 | 0.027 |
| ENSG00000176014 | MARS    | 0.627 | 0.000 |
| ENSG00000100813 | AVL9    | 0.627 | 0.004 |
| ENSG00000149591 | GIGYF2  | 0.627 | 0.013 |
| ENSG00000166483 | NBPF3   | 0.627 | 0.004 |
| ENSG00000160223 | NQO1    | 0.628 | 0.006 |
| ENSG00000165862 | TAGLN   | 0.628 | 0.000 |
| ENSG00000197930 | ENTPD1  | 0.629 | 0.050 |
| ENSG00000149547 | CHD1    | 0.629 | 0.004 |
| ENSG00000122515 | STAG3L3 | 0.629 | 0.001 |
| ENSG00000167965 | TBC1D15 | 0.629 | 0.000 |
| ENSG00000114416 | DEGS1   | 0.629 | 0.018 |
| ENSG00000157800 | CCNG2   | 0.629 | 0.010 |
| ENSG00000131373 | SNRNP40 | 0.629 | 0.026 |
| ENSG00000151116 | CKAP5   | 0.630 | 0.000 |
| ENSG00000008517 | PARVG   | 0.630 | 0.007 |
| ENSG00000181704 | NASP    | 0.630 | 0.006 |
| ENSG00000169554 | SLC12A8 | 0.630 | 0.004 |
| ENSG00000068724 | MAGI3   | 0.630 | 0.017 |
| ENSG00000204361 | HNRPDL  | 0.630 | 0.006 |
| ENSG00000116984 | METTL2B | 0.630 | 0.022 |
| ENSG00000116337 | IRF1    | 0.630 | 0.001 |
| ENSG00000123219 | CEACAM1 | 0.631 | 0.002 |
| ENSG00000131016 | TP53BP2 | 0.632 | 0.046 |
| ENSG00000138750 | SEC63   | 0.634 | 0.025 |
| ENSG00000008441 | GPR114  | 0.634 | 0.025 |
| ENSG00000110324 | CCAR1   | 0.634 | 0.030 |
| ENSG00000134108 | CAP1    | 0.634 | 0.004 |
| ENSG00000148688 | UBE2W   | 0.635 | 0.029 |
| ENSG00000119969 | STAG3L1 | 0.635 | 0.046 |
| ENSG00000104731 | NEK6    | 0.636 | 0.000 |
| ENSG00000100714 | MAPK9   | 0.636 | 0.010 |
| ENSG00000140511 | SKIV2L2 | 0.636 | 0.017 |
| ENSG00000109756 | RSPH3   | 0.636 | 0.030 |

|                 |                 |       |       |
|-----------------|-----------------|-------|-------|
| ENSG00000104472 | ARL8B           | 0.637 | 0.010 |
| ENSG00000116191 | BTN2A2          | 0.637 | 0.032 |
| ENSG00000013810 | GABARAPL1       | 0.638 | 0.000 |
| ENSG00000104972 | CHRAC1          | 0.639 | 0.042 |
| ENSG00000204392 | MYO1E           | 0.639 | 0.014 |
| ENSG00000144840 | TRIT1           | 0.639 | 0.003 |
| ENSG00000130176 | FAM82A2         | 0.639 | 0.030 |
| ENSG00000128989 | SRP72           | 0.639 | 0.000 |
| ENSG00000229404 | SRM             | 0.641 | 0.021 |
| ENSG00000116698 | AMPD2           | 0.642 | 0.000 |
| ENSG00000106484 | SH3BP2          | 0.642 | 0.016 |
| ENSG00000170312 | RBBP7           | 0.642 | 0.017 |
| ENSG00000140382 | TUBB6           | 0.642 | 0.000 |
| ENSG00000103381 | ZMIZ2           | 0.642 | 0.000 |
| ENSG00000132341 | MATR3           | 0.643 | 0.001 |
| ENSG00000000938 | XPO7            | 0.643 | 0.019 |
| ENSG00000185215 | KIAA1598        | 0.643 | 0.022 |
| ENSG00000150667 | SLMAP           | 0.643 | 0.006 |
| ENSG00000094804 | THBS1           | 0.644 | 0.010 |
| ENSG00000125772 | ANKRD28         | 0.644 | 0.046 |
| ENSG00000105983 | RASSF5          | 0.644 | 0.001 |
| ENSG00000122482 | ELAC2           | 0.644 | 0.020 |
| ENSG00000166833 | C3orf17         | 0.645 | 0.020 |
| ENSG00000175787 | ARHGAP5         | 0.646 | 0.000 |
| ENSG00000102054 | CFLAR           | 0.646 | 0.000 |
| ENSG00000066136 | TRIO            | 0.646 | 0.045 |
| ENSG00000056586 | RP11-1319K7.1.1 | 0.646 | 0.048 |
| ENSG00000164062 | EPAS1           | 0.646 | 0.000 |
| ENSG00000164930 | ZNF300          | 0.646 | 0.014 |
| ENSG00000170852 | SART3           | 0.647 | 0.000 |
| ENSG00000132676 | C5orf22         | 0.647 | 0.000 |
| ENSG00000168386 | ASPM            | 0.648 | 0.013 |
| ENSG00000111247 | ARHGEF19        | 0.649 | 0.029 |
| ENSG00000160049 | FUT8            | 0.649 | 0.037 |
| ENSG00000108292 | HNRNPH1         | 0.649 | 0.000 |
| ENSG00000050748 | TLK1            | 0.649 | 0.000 |
| ENSG00000038382 | RAN             | 0.649 | 0.021 |
| ENSG00000168876 | C3              | 0.649 | 0.042 |
| ENSG00000171777 | CPPED1          | 0.649 | 0.000 |
| ENSG00000116977 | NR2C2AP         | 0.650 | 0.020 |
| ENSG00000156802 | DLG3            | 0.650 | 0.042 |
| ENSG00000133706 | FNIP1           | 0.650 | 0.002 |
| ENSG00000085999 | MAP3K7          | 0.650 | 0.003 |
| ENSG00000162924 | GATAD2A         | 0.650 | 0.000 |
| ENSG00000070756 | TRAF3IP3        | 0.650 | 0.005 |
| ENSG00000106638 | MCFD2           | 0.650 | 0.000 |
| ENSG00000111726 | IDH3A           | 0.651 | 0.000 |

|                 |          |       |       |
|-----------------|----------|-------|-------|
| ENSG00000143870 | SLC37A3  | 0.651 | 0.000 |
| ENSG00000174579 | SLC25A46 | 0.651 | 0.000 |
| ENSG00000214837 | CUL2     | 0.651 | 0.002 |
| ENSG00000101311 | WDR48    | 0.651 | 0.027 |
| ENSG00000170727 | PWP1     | 0.652 | 0.000 |
| ENSG00000119707 | RPS6KA4  | 0.652 | 0.047 |
| ENSG00000111679 | ZMYM1    | 0.652 | 0.003 |
| ENSG00000119927 | AIM1     | 0.652 | 0.024 |
| ENSG00000140400 | RCOR3    | 0.653 | 0.024 |
| ENSG00000174353 | ATXN2L   | 0.654 | 0.000 |
| ENSG00000145390 | LYRM2    | 0.654 | 0.007 |
| ENSG00000092148 | ICOSLG   | 0.654 | 0.018 |
| ENSG00000114850 | YME1L1   | 0.654 | 0.001 |
| ENSG00000119335 | SUN2     | 0.654 | 0.011 |
| ENSG0000010292  | SFMBT1   | 0.654 | 0.006 |
| ENSG00000110619 | ITGB3BP  | 0.654 | 0.002 |
| ENSG00000132640 | COMMD10  | 0.654 | 0.042 |
| ENSG00000119509 | CAMK2D   | 0.655 | 0.000 |
| ENSG00000086102 | TCERG1   | 0.655 | 0.026 |
| ENSG00000149311 | CCDC25   | 0.655 | 0.008 |
| ENSG00000163430 | SNX13    | 0.655 | 0.008 |
| ENSG00000197299 | FZD6     | 0.655 | 0.000 |
| ENSG00000175084 | UBR3     | 0.656 | 0.000 |
| ENSG00000142794 | MARCH7   | 0.656 | 0.023 |
| ENSG00000196923 | TMED2    | 0.656 | 0.000 |
| ENSG00000149554 | FAM134B  | 0.656 | 0.005 |
| ENSG00000163945 | NSUN4    | 0.656 | 0.046 |
| ENSG00000139350 | NME4     | 0.657 | 0.000 |
| ENSG00000067048 | PA2G4    | 0.657 | 0.001 |
| ENSG00000086475 | MTHFD1   | 0.657 | 0.018 |
| ENSG00000144354 | TP53     | 0.657 | 0.000 |
| ENSG00000116560 | B4GALT2  | 0.657 | 0.000 |
| ENSG00000139579 | VPRBP    | 0.658 | 0.043 |
| ENSG00000198176 | MON1B    | 0.658 | 0.010 |
| ENSG00000066279 | EIF4G1   | 0.658 | 0.000 |
| ENSG00000011465 | THY1     | 0.659 | 0.038 |
| ENSG00000110090 | SDHAP2   | 0.659 | 0.005 |
| ENSG00000197822 | DSN1     | 0.660 | 0.000 |
| ENSG00000151690 | PGP      | 0.660 | 0.032 |
| ENSG00000171793 | SND1     | 0.660 | 0.000 |
| ENSG00000120708 | MAP2K1   | 0.661 | 0.048 |
| ENSG00000099282 | KIAA0182 | 0.662 | 0.000 |
| ENSG00000161048 | NBEAL2   | 0.663 | 0.000 |
| ENSG00000153563 | PKP4     | 0.663 | 0.038 |
| ENSG00000120519 | CUL4A    | 0.663 | 0.000 |
| ENSG00000130363 | RNF2     | 0.663 | 0.005 |
| ENSG00000164733 | NFKB1    | 0.664 | 0.044 |

|                 |                     |       |       |
|-----------------|---------------------|-------|-------|
| ENSG00000198642 | AC024560.3.1        | 0.664 | 0.025 |
| ENSG00000117625 | SRSF10              | 0.665 | 0.000 |
| ENSG00000141140 | RBM25               | 0.665 | 0.009 |
| ENSG00000188938 | FUS                 | 0.665 | 0.000 |
| ENSG00000179583 | CASD1               | 0.665 | 0.001 |
| ENSG00000111540 | OBFC2B              | 0.665 | 0.002 |
| ENSG00000060642 | ODF2                | 0.666 | 0.039 |
| ENSG00000241978 | TNFAIP2             | 0.666 | 0.036 |
| ENSG00000137825 | ZNF644              | 0.666 | 0.001 |
| ENSG00000028203 | ARMCX5              | 0.668 | 0.034 |
| ENSG00000055044 | CARD16,CARD17,CASP1 | 0.668 | 0.018 |
| ENSG00000162302 | SEH1L               | 0.668 | 0.036 |
| ENSG00000113319 | FYN                 | 0.668 | 0.010 |
| ENSG00000260528 | KIAA0895L           | 0.668 | 0.034 |
| ENSG00000039123 | PPWD1               | 0.668 | 0.005 |
| ENSG00000068366 | RCN1                | 0.669 | 0.002 |
| ENSG00000258366 | THEM4               | 0.669 | 0.011 |
| ENSG00000213213 | MEF2D               | 0.669 | 0.003 |
| ENSG00000023445 | LPAR1               | 0.669 | 0.000 |
| ENSG00000178462 | LMNB2               | 0.669 | 0.000 |
| ENSG00000145860 | BTBD3               | 0.670 | 0.023 |

**Supplementary Table 2:** Genes with significantly decreased (>1.5 fold decrease in expression, q value = false discovery rate [FDR] <0.05) expression by RNA sequencing according to Cuffdiff bioinformatic analysis (see Supplementary Methods)

| Gene_id         | Gene       | Fold change       | q_value |
|-----------------|------------|-------------------|---------|
| ENSG00000133226 | AMIGO3     | undetected before | 0.000   |
| ENSG00000127314 | LGSN       | 17.620            | 0.000   |
| ENSG00000130396 | AC027323.1 | 4.763             | 0.013   |
| ENSG00000139154 | PDZK1      | 3.812             | 0.001   |
| ENSG00000100297 | GSTA1      | 3.368             | 0.007   |
| ENSG00000111799 | MSLN       | 3.278             | 0.001   |
| ENSG00000197785 | PNLIPRP2   | 2.509             | 0.004   |
| ENSG00000157954 | KIAA1984   | 1.706             | 0.017   |
| ENSG00000115419 | SLC37A2    | 1.665             | 0.002   |
| ENSG00000116406 | BAMBI      | 1.634             | 0.000   |
| ENSG00000166928 | PIGZ       | 1.607             | 0.008   |
| ENSG00000163110 | FAM132A    | 1.589             | 0.034   |

**Supplementary Table 3:** Genes with significantly increased (>1.5 fold increase in expression, q value = false discovery rate [FDR] <0.05) expression by RNA sequencing according to Cuffdiff bioinformatic analysis (see Supplementary Methods)

**MEDICAL HISTORY**

Please check conditions **YOU** have now, or have had in the past or list below.

- |                                             |                                        |                                              |                                                        |
|---------------------------------------------|----------------------------------------|----------------------------------------------|--------------------------------------------------------|
| <input type="checkbox"/> Alcohol/drug Abuse | <input type="checkbox"/> Cataracts     | <input type="checkbox"/> Herpes              | <input type="checkbox"/> Rheumatic Fever               |
| <input type="checkbox"/> Anemia             | <input type="checkbox"/> Depression    | <input type="checkbox"/> High Blood Pressure | <input type="checkbox"/> Stroke                        |
| <input type="checkbox"/> Anxiety            | <input type="checkbox"/> Diabetes      | <input type="checkbox"/> High Cholesterol    | <input type="checkbox"/> Thyroid Problem               |
| <input type="checkbox"/> Arthritis          | <input type="checkbox"/> Emphysema     | <input type="checkbox"/> HIV/AIDS            | <input type="checkbox"/> Tuberculosis                  |
| <input type="checkbox"/> Asthma             | <input type="checkbox"/> Epilepsy      | <input type="checkbox"/> Kidney Disease      | <input type="checkbox"/> Sexually Transmitted Diseases |
| <input type="checkbox"/> Bleeding Disorder  | <input type="checkbox"/> Glaucoma      | <input type="checkbox"/> Liver Disease       |                                                        |
| <input type="checkbox"/> Breast Lump        | <input type="checkbox"/> Heart Disease | <input type="checkbox"/> Migraine Headaches  |                                                        |
| <input type="checkbox"/> Cancer: _____      | <input type="checkbox"/> Hepatitis     | <input type="checkbox"/> Prostate Problem    |                                                        |

Other (please list): \_\_\_\_\_

**SURGERIES**

Please check or list the surgeries **YOU** have had.

- |                                              |                                             |                                         |              |
|----------------------------------------------|---------------------------------------------|-----------------------------------------|--------------|
| <input type="checkbox"/> Appendectomy        | <input type="checkbox"/> Heart Bypass/Stent | <input type="checkbox"/> Hysterectomy   | Other: _____ |
| <input type="checkbox"/> Gallbladder Removed | <input type="checkbox"/> Tonsilectomy       | <input type="checkbox"/> Tubal Ligation | _____        |

**HOSPITALIZATIONS** List all of your hospital stays for illness or surgery beginning with the most recent.

| Date | Reason | Hospital | Physician |
|------|--------|----------|-----------|
|      |        |          |           |

**LIFESTYLE CHOICES**

- Smoking Status** Type:  Never  Currently  Quit: YEAR \_\_\_\_\_
- Smokeless Tobacco** Type:  Cigarettes (Packs/day \_\_\_\_\_)  Cigars  Pipes  Second-hand Smoke
- Never  Currently  Snuff  Chew  Quit: YEAR \_\_\_\_\_

- Alcohol Use** Type:  Liquor  Wine  Beer
- 0 drinks/week  1-6 /week  7-14 /week  Over 14/week
- On any single occasion during the past **3 months**, have you had more than **5 drinks** containing alcohol?  Yes  No

- Weight** Now \_\_\_\_\_ 1 year ago \_\_\_\_\_ Desired \_\_\_\_\_
- Caffeine** Drinks per day \_\_\_\_\_ Types:  Cola  Coffee  Tea
- Special diet?**  Vegetarian  Vegan  Other: \_\_\_\_\_
- Exercise** Type: \_\_\_\_\_ Frequency per week \_\_\_\_\_ Duration: \_\_\_\_\_

| <b>Donor Health Information Sheet</b>                                                                    |     |    |
|----------------------------------------------------------------------------------------------------------|-----|----|
| Chronic diseases:                                                                                        |     |    |
|                                                                                                          | YES | NO |
| Antibiotics in past 6 months:                                                                            |     |    |
| If yes, when: _____                                                                                      |     |    |
| Have you been exposed to HIV or viral hepatitis at any time?                                             |     |    |
| Have you ever had sex for drugs or money?                                                                |     |    |
| Are you a man who has had sex with men?                                                                  |     |    |
| Have you had more than one sexual partner in the last 12 months?                                         |     |    |
| Have you ever been incarcerated?                                                                         |     |    |
| Have you ever used intravenous drugs or intranasal cocaine?                                              |     |    |
| Did you have a tattoo or body piercing within 12 months?                                                 |     |    |
| Have you traveled to areas of the world with increased risk of traveler's diarrhea in the past 3 months? |     |    |
| Are you currently ill (flu symptoms, fevers, runny nose, etc.)?                                          |     |    |

|                                                                                                                                                                                                           |  |  |
|-----------------------------------------------------------------------------------------------------------------------------------------------------------------------------------------------------------|--|--|
| Do you have a history of irritable bowel syndrome, or any of the associated symptoms (frequent abdominal cramps, excessive gas, bloating, abdominal distension, fecal urgency, diarrhea or constipation)? |  |  |
| Do you have a history of inflammatory bowel disease such as Crohn’s disease, ulcerative colitis, lymphocytic colitis?                                                                                     |  |  |
| Do you have chronic diarrhea?                                                                                                                                                                             |  |  |
| Do you have chronic constipation or use laxatives regularly?                                                                                                                                              |  |  |
| Do you have a history of gastrointestinal malignancy (cancer) or known colon polyposis?                                                                                                                   |  |  |
| Have you ever had abdominal surgery (for example: gastric bypass, intestinal resection, appendectomy, cholecystectomy, etc.)                                                                              |  |  |
| Do you use probiotics or any other over the counter aids for specific purposes of regulating digestion?                                                                                                   |  |  |

**Supplementary Table 4:** Donor Health Information Sheet

|                                                                                        |
|----------------------------------------------------------------------------------------|
| <b>Stool testing</b>                                                                   |
| Clostridium difficile toxin A and B by PCR; if unavailable, then toxins A and B by EIA |
| Routine bacterial culture for enteric pathogens                                        |
| Fecal Giardia antigen                                                                  |
| Fecal Cryptosporidium antigen                                                          |
| Ova and parasites                                                                      |
| <b>Serologic testing</b>                                                               |
| HIV type 1 and 2                                                                       |
| Hepatitis A virus (HAV) immunoglobulin (Ig) M                                          |
| Hepatitis B virus (HBV) (surface antigen/antibody; core antibody)                      |
| Hepatitis C virus (HCV) antibody                                                       |
| Syphilis serology (Trep-sure ELISA; RPR done if treponemal test is positive)           |

**Supplementary Table 5:** Donor Screening Test

## SUPPLEMENTARY FIGURES

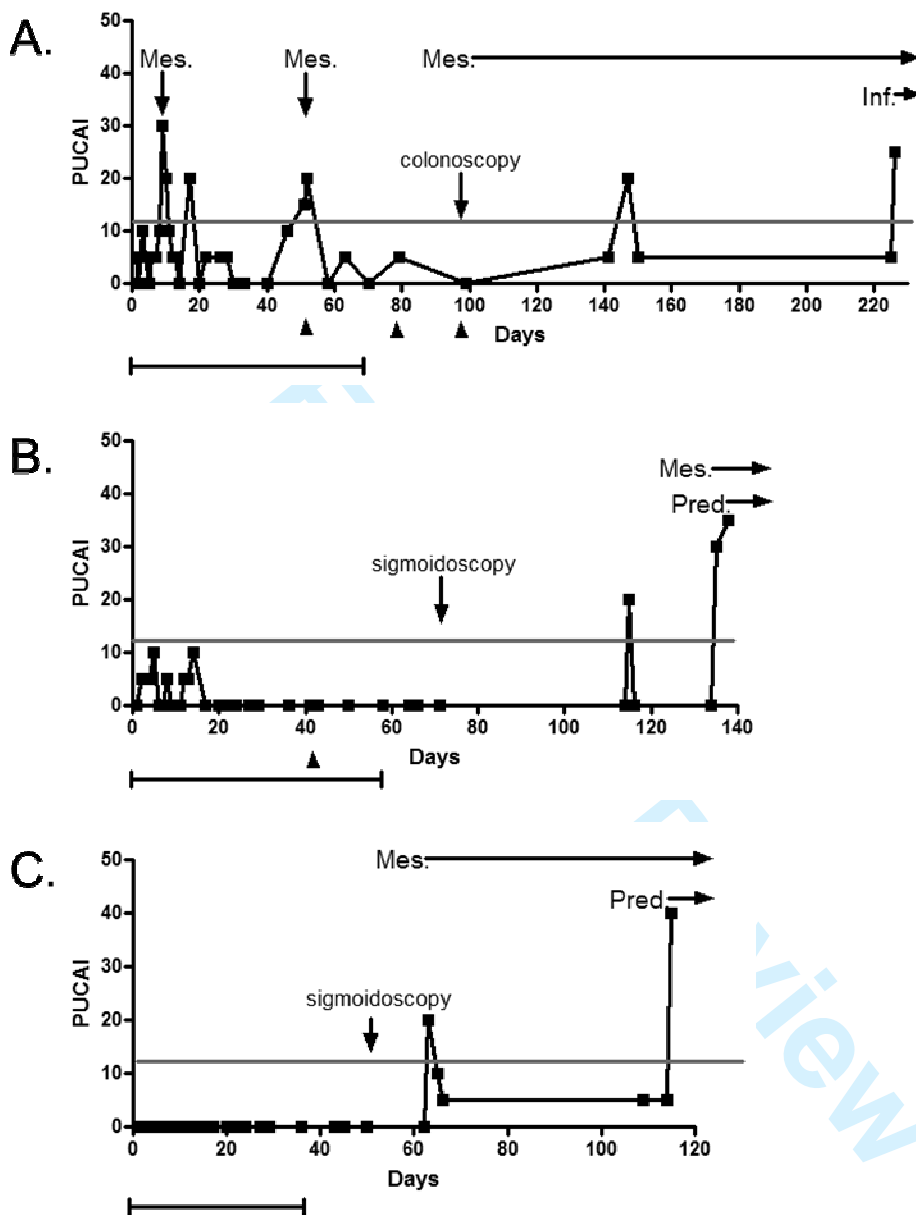

**Supplementary Figure 1. Clinical Disease Activity during the Trial.** Patient 1 (A.) received 30 rounds of FMT and experienced the longest clinical remission (pediatric ulcerative colitis activity index [PUCAI]  $\leq 10$ ; grey line). Patient 2 (B.; 25 treatments) and 3 (C.; 22 treatments) were in remission while receiving the FMT course (— below the x axes designates the time of active FMT therapy). All patients remained in remission following FMT for more than 11 weeks,



but eventually experienced a relapse requiring immunotherapy. The length of the immunotherapy free period correlated with the number of treatments received. Oral and/or rectal mesalamine (Mes.) was allowed during the trial, depending on clinical disease activity. Additional (“rescue”) enemas (▲) were allowed during the first 12 weeks of the trial (i.e. during the weaning course of FMTs). Inf.: infliximab; Pred.: prednisone.

For Peer Review

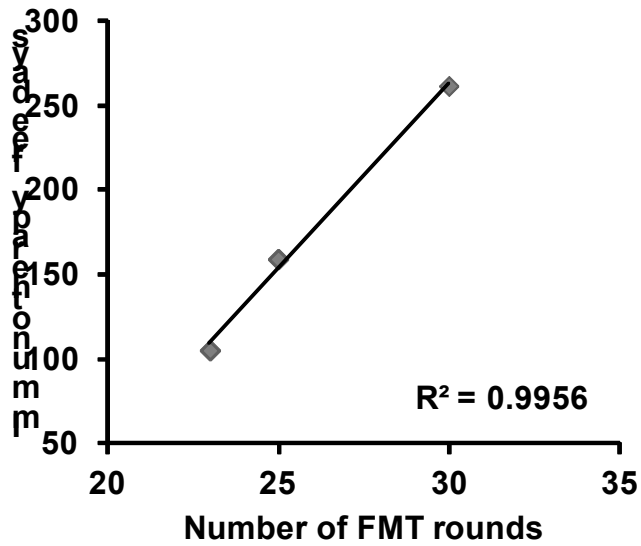

**Supplementary Figure 2. Correlation between Number of FMTs and the Immunotherapy Free Period.** There was a significant ( $r=0.998$ , two tailed  $p=0.04$ ) correlation between the number of FMT rounds received, and the length of the immunotherapy free period (in days) in the 3 patients studied.

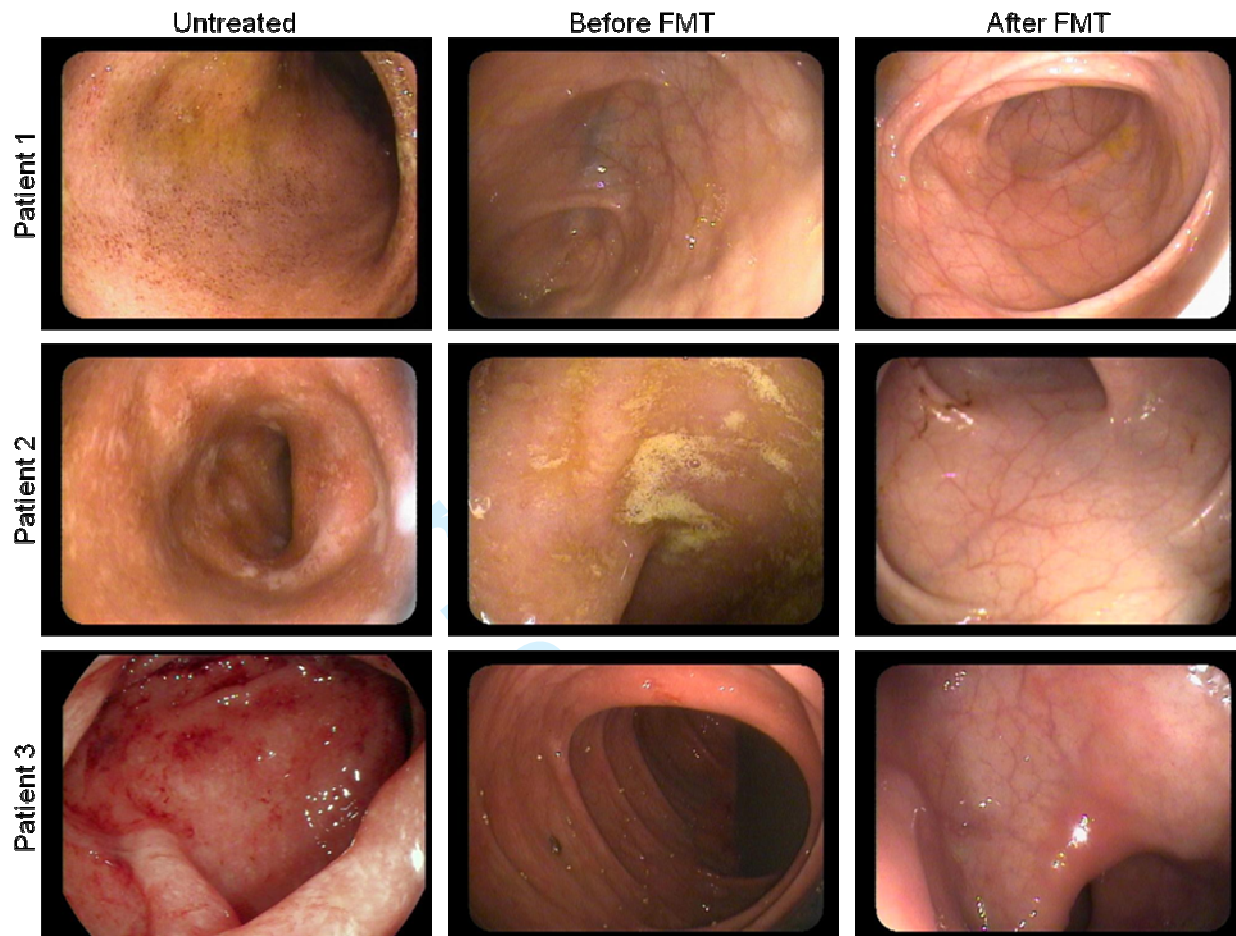

**Supplementary Figure 3. Endoscopic images** of the colonic mucosa at diagnosis (untreated), prior to FMT therapy and 2 weeks following last FMT in the patients. Patient 1 had Mayo 2 level mucosal pancolitis at diagnosis that turned into grossly normal (Mayo 0) picture with infliximab therapy and remained normal following the FMT series. These numbers for patient 2 were: Mayo 2, 1, and 0 at diagnosis, before, and following the FMTs, respectively. Patient 3 had severe (Mayo 3) pancolitis at diagnosis, enrolled in remission on steroids into the trial, then remained in gross mucosal remission (Mayo 0) following the FMTs.

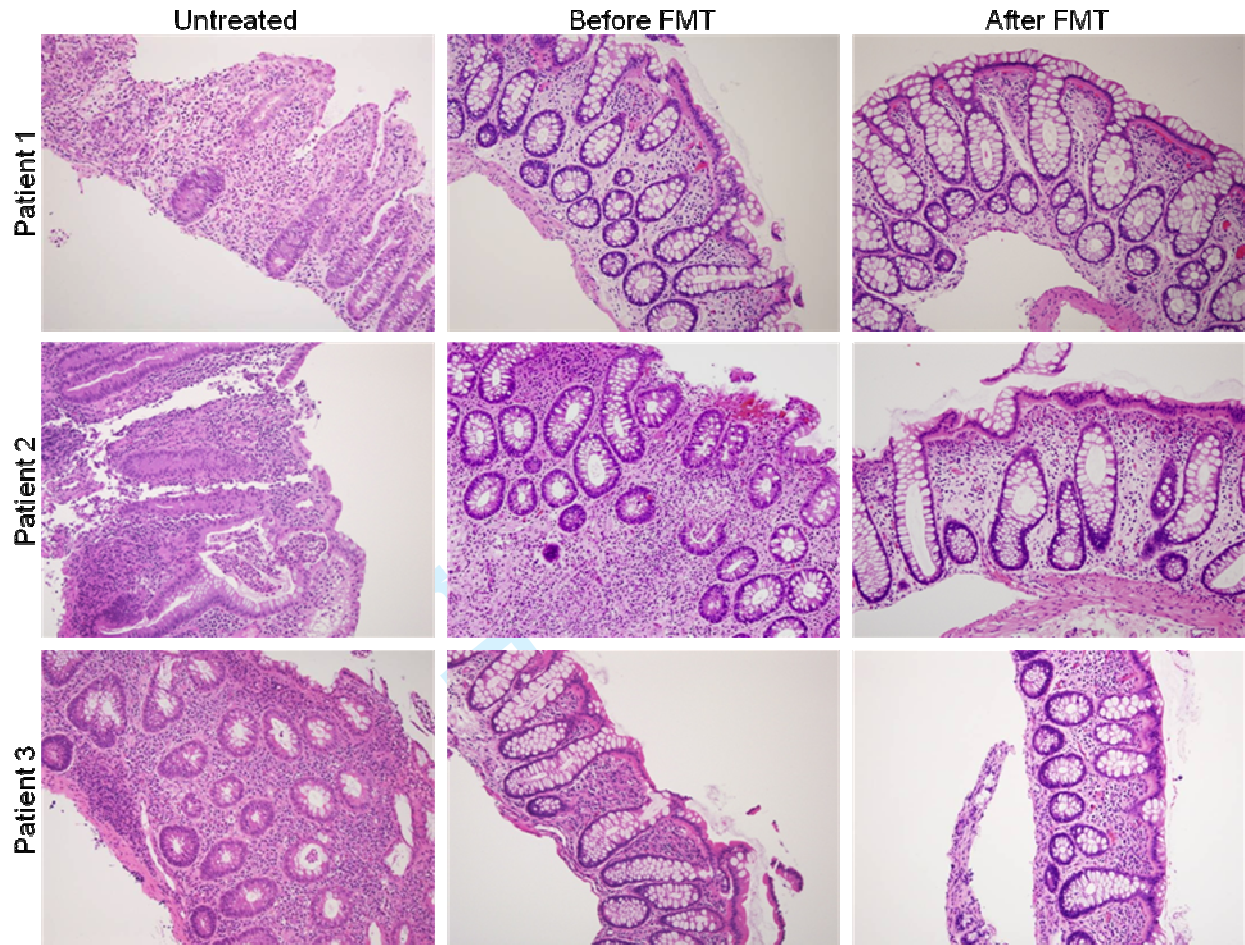

**Supplementary Figure 4. Histologic (hematoxylin and eosin) images** of the colonic mucosa at diagnosis (untreated), prior to FMT therapy and 2 weeks following last FMT in the patients. The histologic severity of inflammation largely mirrored the gross endoscopic findings (see Supplementary Figure 1) in the rectosigmoid colon. All three patients had normal mucosal architecture following the FMT series. Magnification 200x

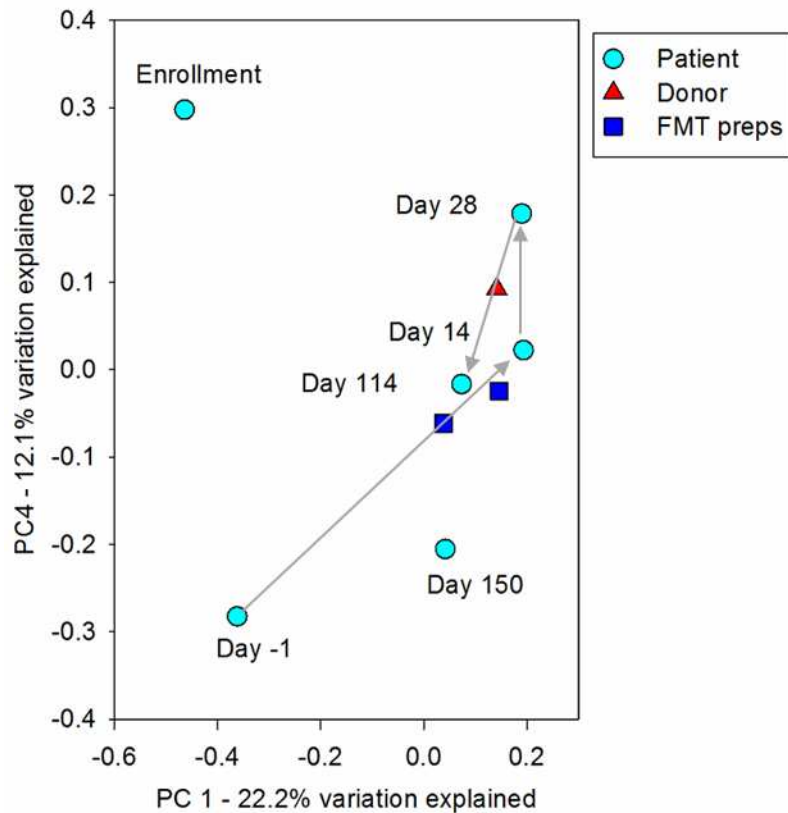

**Supplementary Figure 5. Temporal Microbiome Shifts in Patient 1.** Principle coordinates analysis of unweighted Unifrac distances between patient 1 and the donor (stool and fecal preparations) showed that the recipient microbiomes became similar to that of the donor by 14, 28, and even 114 (2 weeks after last FMT received) days into the study. By day 150, the patient microbiome started to shift back to that before the start of the trial (Day-1). Therefore, the FMT series appeared to induce a transient engraftment of the donor microbiome in the recipient.

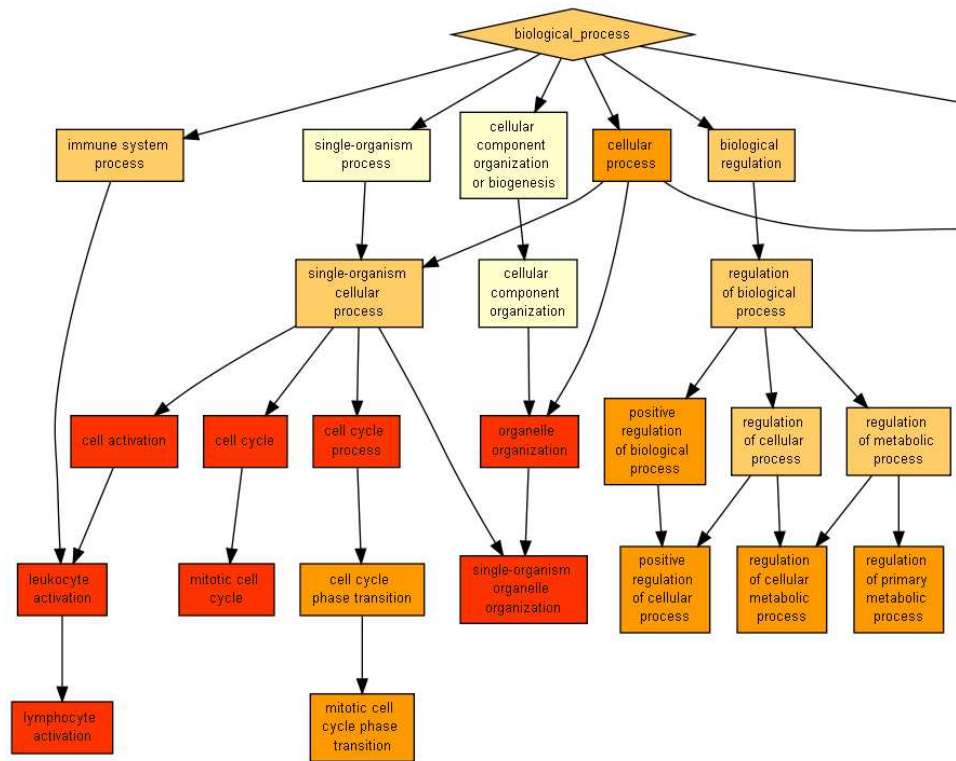

Review

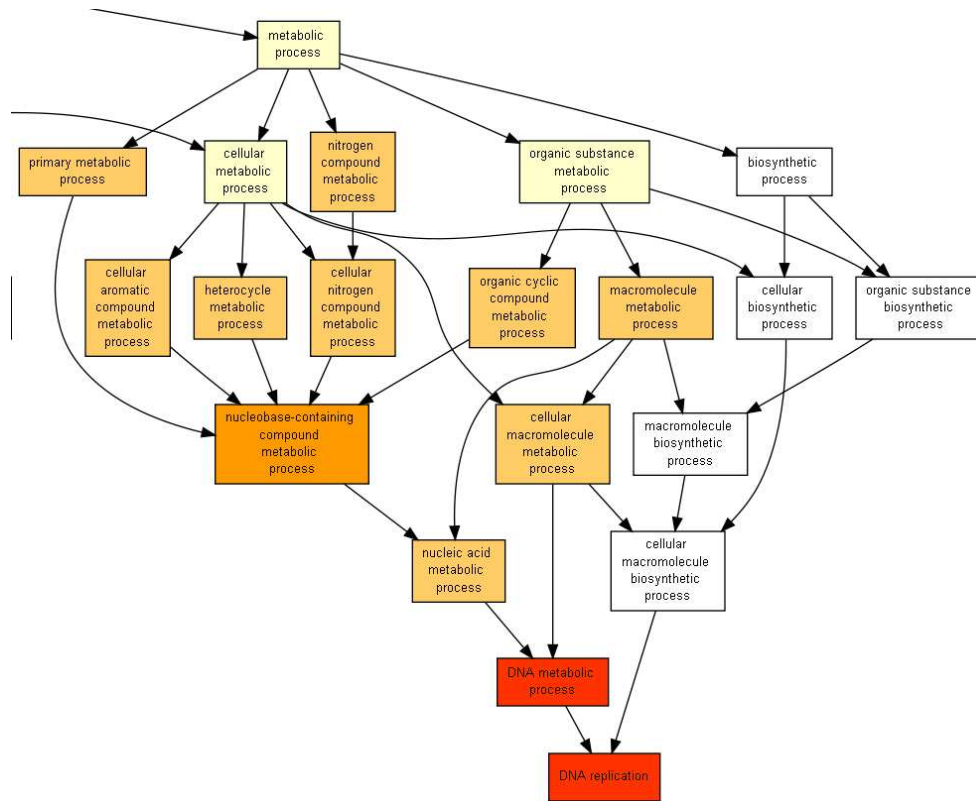

**Supplementary Figure 6. Enrichment of genes in relationship to biological processes** in the down-regulated transcripts upon the series of FMTs in our 3 UC patients (>1.5 fold suppression; FDR<0.05) by Gene Ontology enRiChment anaLysis and visualiZation tool (Gorilla: <http://cbl-gorilla.cs.technion.ac.il/>). The down-regulated transcripts were compared to a control set without expression change (FDR>0.97) upon the FMTs in the rectosigmoid mucosa. light yellow:  $p = 10^{-3}$ - $10^{-5}$ ; dark yellow:  $p = 10^{-5}$ - $10^{-7}$ ; orange:  $p = 10^{-7}$ - $10^{-9}$ ; red:  $p < 10^{-9}$

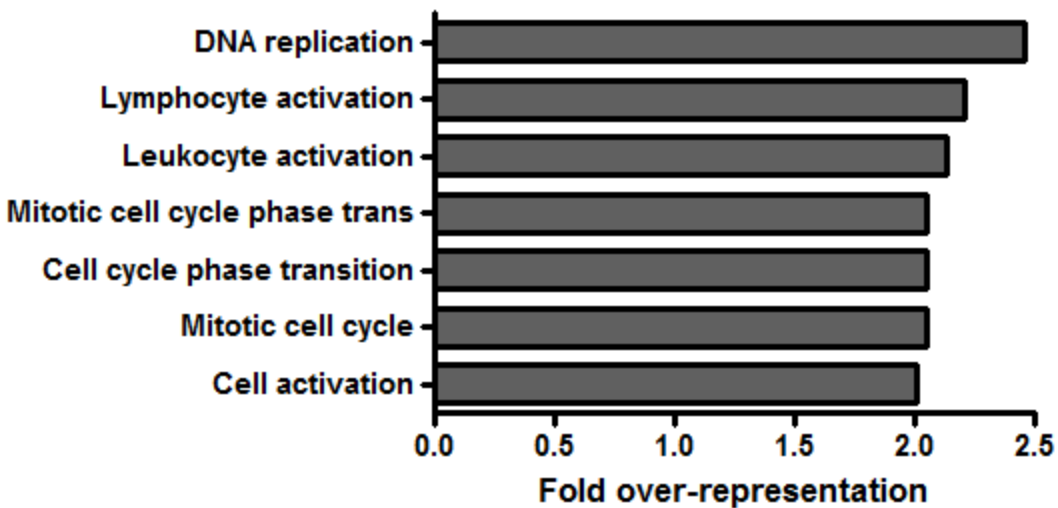

**Supplementary Figure 7. Biological processes** with more than 2 fold over-representation (FDR <math>10^{-5}</math>) in the down-regulated genes compared to control following serial FMTs in UC patients.

Peer Review



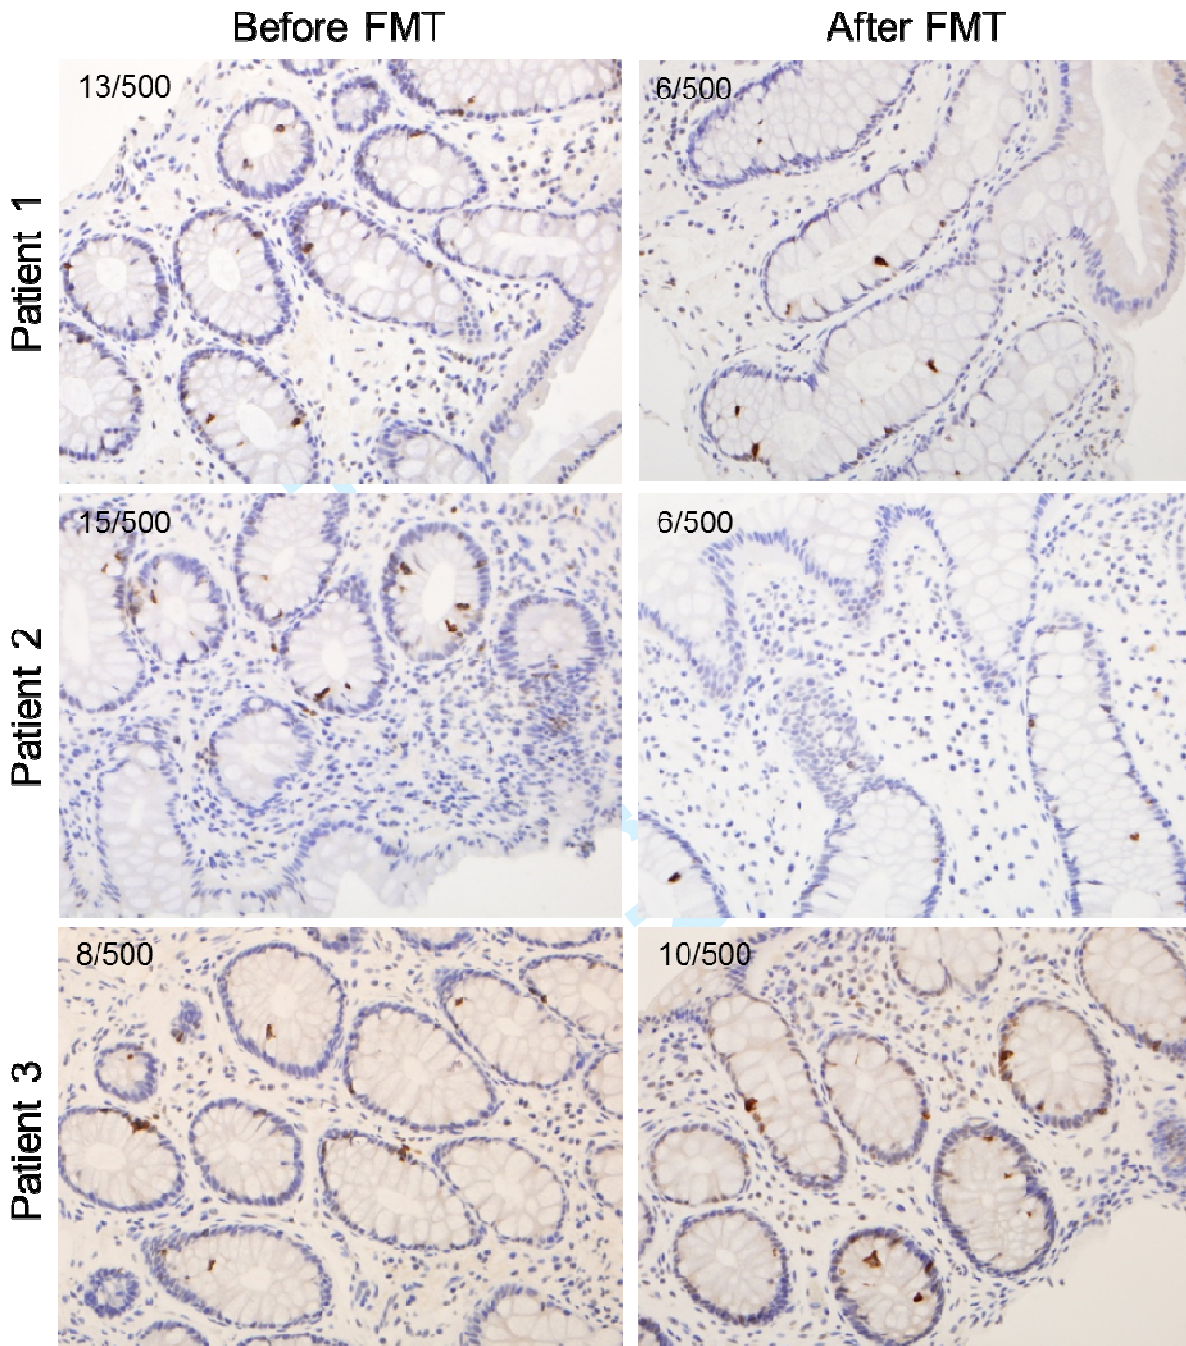

**Supplementary Figure 8. Epithelial Cell Mitosis Suppression Following FMT.** In 2 out of 3 patients, the numbers of epithelial mitoses (blinded examination of 500 epithelial cells) decreased by more than 50% following high intensity FMT. Mitoses were highlighted by histone (H3) immunohistochemistry. Magnification 40x

## References

1. Hamilton MJ, Weingarden AR, Sadowsky MJ, Khoruts A. Standardized Frozen Preparation for Transplantation of Fecal Microbiota for Recurrent *Clostridium difficile* Infection. *Am J Gastroenterol* 2012.
2. Turner D, Otley AR, Mack D, et al. Development, validation, and evaluation of a pediatric ulcerative colitis activity index: a prospective multicenter study. *Gastroenterology* 2007;133:423-32.
3. Brandt LJ, Aroniadis OC, Mellow M, et al. Long-term follow-up of colonoscopic fecal microbiota transplant for recurrent *Clostridium difficile* infection. *Am J Gastroenterol* 2012;107:1079-87.
4. Schroeder KW, Tremaine WJ, Ilstrup DM. Coated oral 5-aminosalicylic acid therapy for mildly to moderately active ulcerative colitis. A randomized study. *N Engl J Med* 1987;317:1625-9.
5. Caporaso JG, Kuczynski J, Stombaugh J, et al. QIIME allows analysis of high-throughput community sequencing data. *Nat Methods* 2010;7:335-6.
6. Riehle K, Coarfa C, Jackson R, et al. The Genboree Microbiome Toolset and the analysis of 16S rRNA microbial sequences. *BCM Bioinformatics* In press.
7. Li W, Godzik A. Cd-hit: a fast program for clustering and comparing large sets of protein or nucleotide sequences. *Bioinformatics* 2006;22:1658-9.
8. Haas BJ, Gevers D, Earl AM, et al. Chimeric 16S rRNA sequence formation and detection in Sanger and 454-pyrosequenced PCR amplicons. *Genome Res* 2011;21:494-504.
9. Wang Q, Garrity GM, Tiedje JM, Cole JR. Naive Bayesian classifier for rapid assignment of rRNA sequences into the new bacterial taxonomy. *Appl Environ Microbiol* 2007;73:5261-7.

**Serial Fecal Microbiota Transplantation ~~May~~  
~~Transiently Support Immunotherapy Withdrawal~~ Alters  
Mucosal Gene Expression  
in Pediatric Ulcerative Colitis  
Fecal Transplant in Pediatric Ulcerative Colitis**

Richard Kellermayer<sup>1,3\*</sup>, Dorottya Nagy-Szakai<sup>1,3</sup>, R. Alan Harris<sup>4</sup>, Ruth Ann Luna<sup>2,5</sup>, Milena Pitashny<sup>2,5</sup>, Deborah Schady<sup>2,5</sup>, Sabina AV Mir<sup>1,3</sup>, Monica E. Lopez<sup>6</sup>, Mark A. Gilger<sup>1#</sup>, John Belmont<sup>4</sup>, Emily B. Hollister<sup>2,5</sup>, and James Versalovic<sup>2,5</sup>

<sup>1</sup>Section of Pediatric Gastroenterology, Department of Pediatrics, Baylor College of Medicine, Houston, Texas, United States of America; <sup>2</sup>Department of Pathology, Texas Children's Hospital, Houston, Texas, United States of America; <sup>3</sup>USDA/ARS Children's Nutrition Research Center, Houston, Texas, United States of America; <sup>4</sup>Department of Human and Molecular Genetics, Baylor College of Medicine, Houston, Texas, United States of America; <sup>5</sup>Department of Pathology & Immunology, Baylor College of Medicine, Houston, Texas, United States of America; <sup>6</sup>Department of Surgery, Baylor College of Medicine, Houston, Texas, United States of America; #Current address: Children's Hospital of San Antonio, Department of Pediatrics, Baylor College of Medicine, Houston, Texas, United States of America

Author contribution: study concept and design: RK, DNS, RAL, MP, MAG, JV; acquisition of data: RK, DNS, DS, SAVM, MEL; analysis and interpretation of data: RK, DNS, RAH, RAL, JB, EBH, JV; drafting of the manuscript: RK, DNS, EBH; critical revision of the manuscript for important intellectual content: RK, MEL, EBH, JB, JV; statistical analysis: RK, RAH, EBH; obtained funding: RK, JV; technical, or material support: MP, JV; study supervision: RK, JV  
Funding and support: Gutsy Kids Fund including philanthropic donation from the Karen and Brock Wagner family, and the support of the Houston Men of Distinction. The work in JV's laboratory is supported in part by research support from the National Institutes of Health (NIH) (UH3 DK083990 and U01 CA170930). The authors also acknowledge support from the NIH for the Texas Medical Center Digestive Diseases Center (P30 DK56338).

Word count: 732

**\*Correspondence:**

Richard Kellermayer M.D., Ph.D.  
Section of Pediatric Gastroenterology, Hepatology & Nutrition  
Baylor College of Medicine  
6621 Fannin St., CC1010.00  
Houston, TX 77030-2399  
Voice: 713-798-0319  
Fax: 832-825-3633  
Email: kellerma@bcm.edu

**ABSTRACT**

**OBJECTIVES:** To the Editor: Complex bacteriotherapy, such as fecal microbiota transplantation (FMT) is an emerging therapeutic modality for ulcerative colitis (UC).(1) FMT has been implicated to allow for withdrawal of conventional therapies in select patients.(2) ~~Recent trials showed variable efficacy of limited (1-6) FMT series in treating UC. We wished to explore the clinical responses, metagenomic modifications, and mucosal gene expression changes induced by a larger series of FMT in pediatric UC patients during withdrawal of their immunosuppressive treatment.~~ **METHODS:** In our study, Three immunotherapy (infliximab, 6-mercaptopurine, and steroid, respectively) dependent pediatric (14-16 year of age) UC patients (**Table 1**) received a tapering course (22-30 treatments) of FMT delivered by colonoscopy and enemas during a 6-12 week period. The phase 1, open label protocol was approved by the Institutional Review Board of Baylor College of Medicine (H-30591). The protocol is currently approved by the FDA (IND-15743; ClinicalTrials.gov number: NCT01947101). Filtered, frozen, and thawed stool specimen from a standardized single donor (37-year-old male) for all 3 patients was used, which provided unique opportunity to examine microbial changes. They Patients were concomitantly withdrawn from their conventional medications. Mucosal disease activity was assessed before, and 2 weeks after the FMT series. Clinical disease activity was followed by the Pediatric Ulcerative Colitis Activity Index (PUCAI). The FMT series was well tolerated and transiently supported immunotherapy withdrawal (Supplementary Figure 1). FMT enabled all 3 patients to be symptom-free for at least 4 weeks following FMT and supported the withdrawal of immunotherapy (no treatment other than mesalamine) for more than 105 days in all. The number of FMT treatments significantly correlated with the time of being immunotherapy-free (r=0.998, p=0.04; Supplementary Figure 2). All patients were in endoscopic and histologic remission 2 weeks after the last FMT (Supplementary Figure 3-4).

\_\_\_\_\_ Fecal microbiomes were analyzed by massively parallel pyrosequencing of the V3V5 regions within the bacterial 16S rRNA gene. The nature of microbiota shifts differed, presumably due to differences in baseline composition of intestinal microbiota in each patient (detected by principal-coordinates-analysis, **Figure 1A**). Recipient microbiomes remained distinct from that of the anonymous donor. FMT series appeared to induce a transient engraftment of the donor microbiome in a recipient (**Supplementary Figure 5**). Microbiome richness (**Figure 1B**) and diversity (**Figure 1C**) increased secondary to FMT. Fifteen operational taxonomic units (OTUs or bacterial taxa) consistently changed in relative abundance in all 3 patients following FMT ( $p < 0.25$ ; **Supplementary Table 1**). Six of 8 OTUs that increased in abundance were not detected in the donor or the recipient prior to FMT. Therefore, expansion of rare taxa may be functionally important in restoring colonic health, at least for short-term periods, following FMT. Of the OTUs that were increased in abundance 61.5% belonged to the *Lachnospiraceae* family. The abundance of *Lachnospiraceae* has been inversely correlated with UC disease activity,<sup>(3)</sup> and those were more abundant in healthy members of monozygotic twin pairs discordant for UC, compared to control.<sup>(4)</sup> At the genus level, only *Coprococcus* changed (increased) in abundance by more than 2 fold. The abundance of *Coprococcus* (a genus including butyrate producing bacteria) has been detected to be decreased in IBD patients.<sup>(5)</sup> Therefore, the increased abundance of *Coprococcus* and *Lachnospiraceae* upon the FMT series may have delivered beneficial effects to the colonic epithelium of the UC patients (recipients).

Colonic mucosal gene expression profiles in response to the FMT series were interrogated by RNA sequencing. ~~The FMT series was well tolerated and transiently supported immunotherapy withdrawal.~~ The expression of 742 genes decreased and 12 increased (>1.5 fold change in expression, false discovery rate [FDR] < 0.05) upon the FMT therapy (**Supplementary Table 2-3**). Importantly, the ~~Therapeutic effects were associated with~~ suppression of human gene expression relevant in leukocyte activation and mitotic cell cycle

progression was observed (Supplementary Figure 6-7). These molecular findings associated with >50% decline in epithelial cell mitosis in 2 out of the 3 patients (Supplementary Figure 8).

**In conclusion,** this report describes high intensity FMT as a strategy to reset the intestinal microbiota in pediatric IBD. Serial FMT in pediatric UC may induce beneficial changes in patient microbiota and colonic mucosa. ~~be well tolerated and potentially therapeutic for select patients.~~ Randomized trials will be required in the future to answer many challenging questions (donor selection, patient selection, number and length of FMT therapy required, etc.) in respect to the clinical application of this treatment.

#### **ACKNOWLEDGEMENTS**

The authors would like to thank the patients and families for participating, the Texas Children's Hospital Research Resources Office (Supriya Parikh, Drs. Susan Blaney and Lisa Bomgaars.), the Gutsy Kids Fund including philanthropic donation from the Karen and Brock Wagner family, and the support of the Houston Men of Distinction. The work in JV's laboratory is supported in part by research support from the National Institutes of Health (NIH) (UH3 DK083990 and U01 CA170930). The authors also acknowledge support from the NIH for the Texas Medical Center Digestive Diseases Center (P30 DK56338).

#### **CONFLICT OF INTEREST**

The authors declare no conflict of interest.

**TABLES**

| Patients<br>(Age,<br>Gender) | Disease<br>Behavior | Mayo<br>Score | Tx<br>after<br>Dx | Mayo<br>Score | FMT<br># | Remission<br>during<br>FMT (in<br>Days) | Mayo<br>Score | Remission<br>after last<br>Medication<br>(Days) | Remission<br>after last<br>FMT<br>(Days) | Tx following<br>Flare    |
|------------------------------|---------------------|---------------|-------------------|---------------|----------|-----------------------------------------|---------------|-------------------------------------------------|------------------------------------------|--------------------------|
|                              |                     | At Dx         |                   | Before<br>FMT |          |                                         | After<br>FMT  |                                                 |                                          |                          |
| 1 (16y M)                    | Pancolitis          | 2             | IFX               | 0             | 30       | 65/70<br>(93%)                          | 0             | 261                                             | 126                                      | IFX                      |
| 2 (15y M)                    | Pancolitis          | 2             | 6MP               | 1             | 25       | 58/58<br>(100%)                         | 0             | 159                                             | 80                                       | PRED<br>FMT              |
| 3 (14y F)                    | Pancolitis          | 3             | PRED              | 0             | 22       | 36/36<br>(100%)                         | 0             | 105                                             | 79                                       | PRED<br>FMT<br>Colectomy |

Table 1. Patient characteristics and clinical outcomes after sequential FMT (IFX: infliximab; 6MP: 6-mercaptopurine; PRED; prednisone).

**FIGURE LEGENDS**

**Figure 1. Fecal Microbiota Shifts Following FMT.** Principle coordinates analysis of unweighted Unifrac distances (A.) revealed that microbial community changes during FMT (arrows connect pre-FMT [within 24 hours before first FMT] and post-FMT [2-3 weeks after last FMT] samples from each patient) were not consistent within each patient (did not shift in the same direction for each patient), and post-FMT fecal communities of recipients (patients) following FMT were dissimilar from that of the donor (▲: donor stool; ■: donor preparations from independent bowel movements on separate days). Microbial richness (B.) and diversity (C.) in terms of microbial taxa consistently increased following the FMT, although these trends did not reach statistical significance.

## STUDY HIGHLIGHTS

## 1. WHAT IS CURRENT KNOWLEDGE

- Fecal microbiota transplantation (FMT) is an emerging treatment for UC with limited number of clinical trials showing variable results.

## 2. WHAT IS NEW HERE

- Three pediatric immunosuppression-dependent UC patients received an unprecedentedly intense FMT regimen during the cessation of their conventional medications.
- This is the first study to examine genome-wide gene expression (RNA-sequencing) responses to FMT.
- Our single donor strategy created an unprecedented opportunity to examine the effects of one source microbiome in different recipients.
- FMT in the context of the 3 patients studied was safe and enabled the short-term withdrawal of immunotherapy.

Keywords: inflammatory bowel disease; fecal microbiota transplantation; gene expression; ulcerative colitis



## INTRODUCTION

Ulcerative colitis (UC) is a form of inflammatory bowel disease (IBD) affecting up to 1/500 people in the developed world.(6) No medical cure exists for the disorder, and it is frequently resistant to conventional therapies. Approximately 20% of patients with UC are diagnosed before age 18.(7, 8) Up to 40.9% of children with UC require surgery (colectomy) within 10 years of diagnosis compared to 19.9% of adults.(9) UC is a precancerous condition(10) with increased risk of colorectal cancer for patients diagnosed before 30 years of age.(11) Therefore, the development of novel therapeutic approaches for pediatric UC is an important medical need.

The procedure of transferring stool from healthy donors into patients has been commonly designated as fecal microbiota transplantation (FMT).(12) FMT has been found superior to conventional antimicrobial therapy in treating recurrent *Clostridium difficile* infection (CDI).(13) CDI affects IBD patients (including children) more commonly than the general population.(14) FMT has been also explored for treating IBD, including UC.(1, 15) According to the current disease paradigm, UC develops secondary to an uncontrolled immune response against the gut microbiome that is transmitted by the intestinal mucosa.(16, 17) Therefore, the disruption of healthy microbiota composition (dysbiosis) may be an important element in disease development and it is hypothesized that the restoration of normal microbiota structure may be therapeutic for this condition.(12, 18) In spite of encouraging outcomes in small cohorts,(19) including children,(20) recent adult FMT (uncontrolled and controlled) trials incorporating metagenomic analyses provided discouraging results.(3, 21, 22) Similarly, 4 pediatric patients with mild to moderate disease activity received no benefit (according to clinical or laboratory parameters) from a single FMT.(23) Importantly, these latter trials involved patients with active UC indicating that individuals with milder disease, or who are in medically induced remission may be better candidates for this unconventional treatment modality.(24) In the meantime, an early-onset (10 months of age), conventional treatment refractory IBD case was successfully treated with 7 rounds of FMT from two different donors.(25) However, none of the published

case series utilized more than 6 consecutive FMT rounds at baseline. Interestingly, 9 out of 16 patients who did not achieve clinical remission after 6 weekly FMTs did so following an additional 6-12 weekly treatments.<sup>(22)</sup> Therefore, based on the current literature, patients in remission may receive the most benefit from an extended course (more than 5 treatments) of FMT.

We present our findings in 3 pediatric patients with immunosuppression-dependent UC, who enrolled into a phase 1, uncontrolled clinical study delivering a serial, highly intense FMT regimen during clinical remission.

### CASE REPORTS

The patients were enrolled into an Institutional Review Board (IRB)-approved clinical trial (see Supplementary Appendix) prior to the Food and Drug Administration (FDA) mandating the need for an investigational drug application for FMT (that is not directed towards the treatment of recurrent CDI). The protocol was stopped after the FDA mandate was issued in May of 2013. Therefore, only 1 patient (patient 1) completed the full 12-week course (28 scheduled treatments + "rescue" enemas if clinically indicated) of FMT.

Patient 1: A 16-year-old male was diagnosed with pancolitis (Mayo score<sup>(26)</sup>=2; Supplementary Figure 1) one year before enrollment. His prior therapy included infliximab, oral corticosteroids and mesalamine. He was weaned off oral steroids and continued on infliximab infusions with oral mesalamine. FMT was initiated when he was in clinical (pediatric ulcerative colitis activity index;<sup>(27)</sup> PUCAI=5), macroscopic (Supplementary Figure 1), and microscopic (Supplementary Figure 2) remission after 6 weeks without infliximab. Thirty (30) treatments were administered during 3 months. He received mesalamine enemas twice for mild exacerbations (PUCAI ≥15).

The patient remained in clinical remission (PUCAI <10) for more than 90% (65/70 days) of the treatment course (Figure 1A). No adverse events were noted. A follow-up endoscopy 3 weeks after the last FMT showed the entire colon to be grossly normal (Supplementary Figure 1). However, histological inflammation in his transverse colon was detected, and maintenance oral mesalamine therapy was started. The patient remained in clinical remission (symptom free, lab values within normal ranges, including fecal calprotectin) for 8 months (261 days) after his last infliximab treatment, 4 months (126 days) after his last FMT. At this time, he developed a mild disease flare (PUCAI=25) and wished to go back on infliximab therapy. He had intermittent breakthrough symptoms on 7.5 mg/kg infliximab every 6 weeks and daily mesalamine treatments.

Patient 2: A 15-year-old male with a history of UC with pan-colitis (Mayo: 2; Supplementary Figure 1) was treated for more than one year with 6-mercaptopurine (6MP), allopurinol, and daily oral mesalamine. He tested positive for toxigenic *Clostridium difficile* infection (CDI) at enrollment. Metronidazole therapy successfully cleared the CDI prior to starting FMT. Allopurinol and 6MP were stopped 3 weeks prior to initiation of FMT. Initial colonoscopy showed mildly active colitis (Mayo: 1; Supplementary Figure 1) with histological inflammation (Supplementary Figure 2) throughout the colon. Mesalamine was stopped on day 6 after initiation of FMT. The patient remained in remission throughout FMT therapy (Figure 1B). Twenty-five FMT treatments were administered to this patient, and no adverse events were noted. The colon was grossly normal by sigmoidoscopy performed 2 weeks after the final FMT (Mayo 0; Supplementary Figure 1). No evidence of mucosal inflammation in the colon was found by histology (Supplementary Figure 2). This patient remained in remission (PUCAI<10) without any therapy for more than 2 months (80 days after last FMT, 159 days after last 6MP dose). However, he became symptomatic (PUCAI=35) and did not respond to oral mesalamine therapy following

this symptom-free period. Pulse steroid treatments were initiated, and he required intermittent low-dose steroid therapy with 4-5 week steroid-free intervals.

**Patient 3:** A 14-year-old female was diagnosed with severely active pancolitis four months prior to enrollment (Mayo 3, Supplementary Figure 1). She could not be weaned off steroids for more than 4-week intervals, and she opted to enroll into the FMT trial. Steroids were tapered during the first 10 days of FMT treatment, and mesalamine was stopped on day 14. She remained in remission during the FMT period (Figure 1C). She received 22 rounds of FMT with only one episode of moderate, self-resolving, positional headache noted. Sigmoidoscopy 2 weeks after the last FMT showed a grossly normal (Mayo 0) colon. No evidence of colonic mucosal inflammation was found by histology. She developed a flare during travel 4 weeks following the last FMT (PUCAI=20). Oral mesalamine successfully induced remission. She repeatedly became symptomatic with bloody stools and cramping (PUCAI=50) 11 weeks (79 days) after the last FMT (105 days after last steroid dose), at which time pulse steroid therapy was initiated. She remained steroid-dependent following re-initiation of steroid therapy.

## **METHODS**

### **FMT protocol**

The patients received a tapering course of FMT following informed consent according to a phase 1, open-label protocol approved by the Institutional Review Board of Baylor College of Medicine (H-30591). The protocol is currently approved by the FDA (IND-15743). Stool was collected for analysis one day prior to the initial FMT by colonoscopy, and 2 weeks after the last FMT. Rectal biopsy samples were formalin-fixed for histologic analysis, flash frozen on dry ice, or stored in RNALater™. The first FMT utilizing filtered, frozen, and thawed stool specimen from a standardized single donor (37-year-old male) for all 3 patients was administered via endoscopic delivery. Thereafter, a tapering course of rectal FMT enemas were given to all

patients, culminating in a range of 22–30 rounds of FMT (for further details see Methods section in the Supplementary Appendix). The corresponding author and co-authors had access to the study data and had reviewed and approved the final manuscript.

### **Microbiome analyses**

The fecal microbiota was analyzed according to previous studies(28) by massively parallel pyrosequencing of the V3V5 regions of the bacterial 16S *rRNA* gene (see Methods section in the Supplementary Appendix).

### **RNA sequencing and analyses**

Total RNA was isolated from rectal biopsy specimens (stored in RNALater™ [Ambion through Life Technologies, Carlsbad, California]) according to the manufacturer's recommendation, with Trizol (15596, Life Technologies) and the RNeasy Mini Kit (74106, Qiagen). RNA samples were stored at –80°C until processing for RNA sequencing (see Methods section in the Supplementary Appendix).

### **Statistical analyses**

The two-tailed paired t test was used for group comparisons. Significance was relaxed to an arbitrary  $p < 0.25$  for OTU comparisons; otherwise it was determined at  $p < 0.05$ . The Pearson correlation coefficient was calculated in Excel (Microsoft Office Excel 2007). Statistical significance of correlations was calculated with public Statistics Calculator version 3.0 (<http://www.danielsoper.com/statcalc3/calc.aspx?id=44>) and determined at  $p < 0.05$ . See Methods section in Supplementary Appendix for bioinformatic analyses applied to the RNA sequencing data.

## **RESULTS**

### **Serial FMT transiently supported immunotherapy withdrawal**

FMT enabled all 3 patients to be symptom-free for at least 4 weeks following FMT and supported the withdrawal of immunotherapy (no treatment other than mesalamine) for more than 105 days in all. The number of FMT treatments significantly correlated with the time of being immunotherapy-free ( $r=0.998$ ;  $p=0.04$ , Figure 2).

### **Fecal microbiome shifts upon serial FMTs**

Fecal microbiomes were examined before and 2 weeks after the FMT series. Shifts in recipient fecal bacterial compositions were detected by principal coordinates analysis (PCoA) (Figure 3A). The nature of microbiota shifts differed, presumably due to differences in baseline composition of intestinal microbiota in each patient. Recipient microbiomes remained distinct from that of the anonymous donor. In the meantime, microbiome richness (Figure 3B) and diversity (Figure 3C) increased secondary to FMT. Fifteen operational taxonomic units (OTUs or bacterial taxa) consistently changed in relative abundance in all 3 patients following FMT ( $p<0.25$ ) (Supplementary Table 1). The relative abundance of each of these fifteen OTUs was originally  $<2\%$  in the recipients, and averaged  $<1\%$  in two independent donor preparations. Two OTUs decreased, and 13 taxa increased in relative abundance following FMT. Eight of the 13 (61.5%) OTUs that increased in relative abundance were undetected in the examined donor preparations. Presumably these species pre-existed at low levels (perhaps below the lower limits of detection) in the donor or recipients, and were able to proliferate in the recipient intestine following FMT. Six of 8 OTUs that increased in relative abundance in recipient patients were not detected in the donor or the recipient prior to FMT. Therefore, expansion of rare taxa may be functionally important in restoring colonic health, at least for short-term periods, following FMT. At the genus level, the abundance of *Coprococcus* increased more than 3-fold after the FMT series, and no other genera changed in abundance by more than 2-fold following FMT.

— We also examined temporal changes in the fecal microbiome of Patient 1, who received the full 12-week course of the planned FMT series from the same donor (Donor 2). The patient's microbiome shifted in composition after cessation of immunotherapy, independent of FMT. The enrollment sample was obtained within 3 weeks (19 days) after an infliximab treatment, while the consecutive (Day 1) sample was collected 6 weeks (43 days) following the receipt of the biologic agent, which can significantly influence microbiome composition.<sup>(29)</sup> By the end of the multi-FMT treatment course (daily in days 1–14) and thrice weekly (days 15–28), the fecal microbiomes of the recipient became more similar to that of the donor (Figure 3A), and this shift towards the donor's microbial community profile continued following 2 weeks after the last FMT received (Day 114). Seven weeks after the last FMT (Day 150), the fecal microbiome of the recipient started drifting back to its original state before the FMT series. Therefore, the FMT series appeared to induce a transient engraftment of the donor microbiome in the recipient.

#### **Mucosal transcriptome and epithelial cell proliferation changes after the FMT series**

RNA sequencing demonstrated that 742 genes decreased in expression ( $>1.5$  fold decrease in expression, false discovery rate [FDR] $<0.05$ ) in the rectal mucosa of the patients 2 weeks following FMT (Supplementary Table 2). Only 12 genes increased significantly in terms of relative expression. Down-regulated genes were compared by gene ontology enrichment analysis to a control set of human genes lacking evidence of changes in gene expression following FMT (FDR $>0.97$ ). Genes linked to leukocyte activation and mitotic cell cycle progression were down-regulated (Supplementary Figure 4). More specifically, 7 biological processes, were highly significantly (FDR $<10^{-5}$ ) enriched by more than 2 fold in association with the down-regulated genes, compared to the control genes (Supplementary Figure 4). Based on these findings, we decided to functionally assess the consequences of FMT in the colonic mucosa of the patients in respect to mitotic activity changes. We found that 2 out of the 3

patients showed evidence that epithelial mitoses had been reduced by more than 50 percent (Figure 5).

## DISCUSSION

This report describes high intensity FMT as strategy to reset the intestinal microbiota in pediatric IBD. A single anonymous donor was used as the microbiota source for all 3 patients. This strategy created an unprecedented opportunity to examine the effects of single source FMT in different recipients. Furthermore, this is the first study to interrogate human gene expression responses in the intestinal mucosa following FMT by an unbiased genome wide methodology. Treatment of pediatric UC patients in medically induced remission, with relatively short disease duration, and lacking other medical complications may have created a fertile opportunity for FMT to alter human biology. Pediatric FMT in the context of UC was well tolerated and enabled the short term withdrawal of immunotherapy. However, all 3 patients eventually relapsed, requiring the re-institution of immunotherapy after a “washout” period. Interestingly, the length of the “washout” correlated with the number of FMT rounds. This result indicates that high intensity FMT may provide an alternative to immunotherapy in pediatric UC.

— The microbiome shifts following multi-FMT regimens in pediatric UC have yielded interesting results regarding microbial compositional changes with intensive microbial manipulation strategies. Grehan et al.,(30) found that durable alterations of fecal microbiomes were observed following 4-15 rounds of FMT in patients with variable indications. This study differed from ours by employing 5-10 days of antibiotic treatment prior to FMT and using different methods such as denaturing gradient gel electrophoresis for microbial composition studies. Our findings share conclusions from a recent publication utilizing similar methodologies,(21) whereby no obvious association was found between clinical responses and whole bacterial community based metagenomic changes in UC patients after FMT. The recipient (patient) intestinal microbiomes did become more similar to that of the donor, but



retained distinctive features compared to changes seen in FMT for CDI. Possibly, these differences are due to richer and more diverse microbiomes in IBD (relative to CDI) without antibiotic pre-treatment prior to FMT. Microbial richness and diversity increased secondary to the FMT series, although the donor's microbiome was neither richer, nor more diverse than that of the recipients. The donor microbiome was compositionally different than that of patients, and yielded some common effects in all 3 recipients. Of the OTUs that were increased in abundance 61.5% belonged to the *Lachnospiraceae* family. The abundance of *Lachnospiraceae* has been inversely correlated with UC disease activity,(3) and those were more abundant in healthy members of monozygotic twin pairs discordant for UC, compared to control.(4) At the genus level, only *Coprococcus* changed (increased) in abundance by more than 2 fold. The abundance of *Coprococcus* (a genus including butyrate producing bacteria) has been detected to be decreased in IBD patients(5). Therefore, the increased abundance of *Coprococcus* upon the FMT series may have delivered beneficial effects to the colonic epithelium of the UC patients (recipients).

——— The temporal changes during the FMT series, in one of our patients who received the entirety of the treatments planned, supported a transient engraftment of the donor microbiome consistent with some longitudinal observations of CDI patients after FMT.(31)

Altogether, our metagenomic findings argue that high intensity FMT can change the composition and presumably function of the intestinal microbiota in pediatric patients with UC. The resulting patient microbiomes reflected new combinations of microbes that could not simply be explained by addition of the donor fecal microbiota.

Changes in the UC gut microbiomes following the FMT series associated with suppression of mucosal gene expression, especially genes involved in leukocyte activation and cell proliferation (mitosis). Histology showed evidence of decreased mitoses in the intestinal mucosa, suggesting that microbial composition and function is likely to influence mucosal

immune responses and intestinal epithelial cell proliferation. Indeed, single probiotics have already been shown to affect intestinal epithelial cell differentiation in mammals.(32)

We acknowledge the limitations of this study:

- 1.—This is an uncontrolled trial on a very small patient population. Correlation between number of rounds of FMT and clinical remission without major immunotherapy may have been a coincidence in the setting of a more sustained and durable remission in Patient 1 than in the other patients. However, Patient 1 had persistent breakthrough symptoms on infliximab necessitating treatments every 6 weeks prior to enrollment. He also had mild disease flares during the trial that responded to mesalamine. This clinical course argues against deeper remission in this patient compared to the other 2 cases. Additionally, the mucosal histologic and gene expression changes indicate that the patients were in deeper remission (dampened leukocyte activation) two weeks after the last FMT (17 weeks after last infliximab, 12 weeks after last 6MP, and 6 weeks after last prednisone) than at the initiation of the protocol. Therefore, we argue that the correlation between the number of FMTs and length of immunotherapy free disease may be clinically relevant in spite of the low number of cases studied.
- 2.—Secondary to the FDA mandate on IND requirements the patients did not receive the same number of FMT rounds and had variable length of treatment. This unplanned variation allowed for us to draw correlation between the number of FMTs received and the length of immunotherapy free disease.
- 3.—Although FMT was well tolerated by our patients, we can only make limited conclusions about the safety of this treatment in pediatric UC. Adverse events and even worsening of disease have been certainly noted in both pediatric and adult UC patients following FMT.(23, 33-35) However, those patients had more active disease when receiving FMT than the subjects in this study. Our findings support the conclusion(24) that UC patients in clinical

and endoscopic remission, or those with only mild disease activity, may benefit the most from FMT.

Along with the limitations, this work possesses multiple strengths:

1. This is the first study on FMT that attempts to address mechanisms by linking clinical effects with changes in fecal metagenomics and mucosal gene expression.
2. Standardized measures of clinical (PUCAI) and endoscopic (Mayo score) disease activity were employed.
3. The patients studied were of similar age, disease extent, and disease duration.
4. The same donor was used to treat all 3 patients.

In conclusion, this study provides the rationale to extend clinical research in IBD beyond simple bacteriotherapy towards the optimization of complex bacteriotherapy for the treatment of UC.

## ACKNOWLEDGEMENTS

The authors would like to thank the patients and families for participating, the Texas Children's Hospital Research Resources Office (Supriya Parikh, Drs. Susan Blaney and Lisa Bomgaars), the Gutsy Kids Fund including philanthropic donation from the Karen and Brock Wagner family, and the support of the Houston Men of Distinction. The work in JV's laboratory is supported in part by research support from the National Institutes of Health (NIH) (UH3-DK083990 and U01-CA170930). The authors also acknowledge support from the NIH for the Texas Medical Center Digestive Diseases Center (P30-DK56338).

## REFERENCES

1. Colman RJ, Rubin DT. Fecal microbiota transplantation as therapy for inflammatory bowel disease: A systematic review and meta-analysis. *J Crohns Colitis* 2014.
2. Kunde S, Pham A, Bonczyk S, et al. Safety, Tolerability, and Clinical Response after Fecal Transplantation in Children and Young Adults with Ulcerative Colitis. *J Pediatr Gastroenterol Nutr* 2013.

3. Angelberger S, Reinisch W, Makristathis A, et al. Temporal Bacterial Community Dynamics Vary Among Ulcerative Colitis Patients After Fecal Microbiota Transplantation. *Am J Gastroenterol* 2013;108:1620-1630.
4. Lepage P, Hasler R, Spehlmann ME, et al. Twin study indicates loss of interaction between microbiota and mucosa of patients with ulcerative colitis. *Gastroenterology* 2011;141:227-36.
5. Chen L, Wang W, Zhou R, et al. Characteristics of fecal and mucosa-associated microbiota in chinese patients with inflammatory bowel disease. *Medicine (Baltimore)* 2014;93:e51.
6. Molodecky NA, Soon IS, Rabi DM, et al. Increasing incidence and prevalence of the inflammatory bowel diseases with time, based on systematic review. *Gastroenterology* 2012;142:46-54 e42; quiz e30.
7. Kappelman MD, Moore KR, Allen JK, et al. Recent Trends in the Prevalence of Crohn's Disease and Ulcerative Colitis in a Commercially Insured US Population. *Dig Dis Sci* 2013;58:519-25.
8. Griffiths AM. Specificities of inflammatory bowel disease in childhood. *Best Pract Res Clin Gastroenterol* 2004;18:509-23.
9. Van Limbergen J, Russell RK, Drummond HE, et al. Definition of phenotypic characteristics of childhood-onset inflammatory bowel disease. *Gastroenterology* 2008;135:1114-22.
10. Peneau A, Savoye G, Turck D, et al. Mortality and cancer in pediatric-onset inflammatory bowel disease: a population-based study. *Am J Gastroenterol* 2013;108:1647-53.
11. Lutgens MW, van Oijen MG, van der Heijden GJ, et al. Declining risk of colorectal cancer in inflammatory bowel disease: an updated meta-analysis of population-based cohort studies. *Inflamm Bowel Dis* 2013;19:789-99.
12. Borody TJ, Campbell J. Fecal microbiota transplantation: current status and future directions. *Expert Rev Gastroenterol Hepatol* 2011;5:653-5.
13. van Nood E, Vrieze A, Nieuwdorp M, et al. Duodenal infusion of donor feces for recurrent *Clostridium difficile*. *N Engl J Med* 2013;368:407-15.
14. Mir SA, Kellermayer R. *Clostridium difficile* infection in newly diagnosed pediatric inflammatory bowel disease in the mid-southern United States. *J Pediatr Gastroenterol Nutr* 2013;57:487-8.
15. Anderson JL, Edney RJ, Whelan K. Systematic review: faecal microbiota transplantation in the management of inflammatory bowel disease. *Aliment Pharmacol Ther* 2012;36:503-16.
16. Sartor RB. Mechanisms of disease: pathogenesis of Crohn's disease and ulcerative colitis. *Nat Clin Pract Gastroenterol Hepatol* 2006;3:390-407.
17. Kellermayer R. Genetic drift. "Omics" as the filtering gateway between environment and phenotype: The inflammatory bowel diseases example. *Am J Med Genet A* 2010;152A:3022-5.
18. Nagy-Szakal D, Kellermayer R. The remarkable capacity for gut microbial and host interactions. *Gut Microbes* 2011;2:178-82.
19. Borody TJ, Warren EF, Leis S, et al. Treatment of ulcerative colitis using fecal bacteriotherapy. *J Clin Gastroenterol* 2003;37:42-7.
20. Kunde S, Pham A, Bonczyk S, et al. Safety, tolerability, and clinical response after fecal transplantation in children and young adults with ulcerative colitis. *J Pediatr Gastroenterol Nutr* 2013;56:597-601.
21. Kump PK, Grochenig HP, Lackner S, et al. Alteration of Intestinal Dysbiosis by Fecal Microbiota Transplantation Does not Induce Remission in Patients with Chronic Active Ulcerative Colitis. *Inflamm Bowel Dis* 2013;19:2155-2165.
22. Moayyedi PS, M.; Wolfe, M.; Taraschi, R.; Kim, P.; Libertucci, J.; Armstrong, D.; Marshall, JK.; Reinisch, W.; Le, CH. A randomized, placebo controlled trial of fecal microbiota therapy in active ulcerative colitis. *Gastroenterology* 2014;146:S-159.
23. Suskind DL, Singh N, Nielson H, et al. Fecal Microbial Transplant via Nasogastric Tube for Active Pediatric Ulcerative Colitis. *J Pediatr Gastroenterol Nutr* 2014.

24. Rubin DT. Editorial: Curbing our Enthusiasm for Fecal Transplantation in Ulcerative Colitis. *Am J Gastroenterol* 2013;108:1631-1633.
25. Vandenplas Y, Veereman G, van der Werff Ten Bosch J, et al. Fecal Microbial Transplantation in a One-Year-Old Girl with Early Onset Colitis - Caution Advised. *J Pediatr Gastroenterol Nutr* 2014.
26. Schroeder KW, Tremaine WJ, Ilstrup DM. Coated oral 5-aminosalicylic acid therapy for mildly to moderately active ulcerative colitis. A randomized study. *N Engl J Med* 1987;317:1625-9.
27. Turner D, Otley AR, Mack D, et al. Development, validation, and evaluation of a pediatric ulcerative colitis activity index: a prospective multicenter study. *Gastroenterology* 2007;133:423-32.
28. Nagy-Szakai D, Ross MC, Dowd SE, et al. Maternal micronutrients can modify colonic mucosal microbiota maturation in murine offspring. *Gut Microbes* 2012;3.
29. Morgan XC, Tickle TL, Sokol H, et al. Dysfunction of the intestinal microbiome in inflammatory bowel disease and treatment. *Genome Biol* 2012;13:R79.
30. Grehan MJ, Borody TJ, Leis SM, et al. Durable alteration of the colonic microbiota by the administration of donor fecal flora. *J Clin Gastroenterol* 2010;44:551-61.
31. Petrof EO, Gloor GB, Vanner SJ, et al. Stool substitute transplant therapy for the eradication of *Clostridium difficile* infection: 'RePOOPulating' the gut. *Microbiome* 2013;1.
32. Preidis GA, Saulnier DM, Blutt SE, et al. Probiotics stimulate enterocyte migration and microbial diversity in the neonatal mouse intestine. *FASEB J* 2012;26:1960-9.
33. De Leon LM, Watson JB, Kelly CR. Transient flare of ulcerative colitis after fecal microbiota transplantation for recurrent *Clostridium difficile* infection. *Clin Gastroenterol Hepatol* 2013;11:1036-8.
34. Hohmann EL, Ananthakrishnan AN, Deshpande V. Case Records of the Massachusetts General Hospital. Case 25-2014. A 37-year-old man with ulcerative colitis and bloody diarrhea. *N Engl J Med* 2014;371:668-75.
35. Schwartz M, Gluck M, Koon S. Norovirus gastroenteritis after fecal microbiota transplantation for treatment of *Clostridium difficile* infection despite asymptomatic donors and lack of sick contacts. *Am J Gastroenterol* 2013;108:1367.

## FIGURE LEGENDS

**Figure 1. Clinical Disease Activity during the Trial.** Patient 1 (A.) received 30 rounds of FMT and experienced the longest clinical remission (pediatric ulcerative colitis activity index [PUCAI]  $\leq 10$ ; grey line). Patient 2 (B.; 25 treatments) and 3 (C.; 22 treatments) were in remission while receiving the FMT course (— below the x axes designates the time of active FMT therapy). All patients remained in remission following FMT for more than 11 weeks, but eventually experienced a relapse requiring immunotherapy. The length of the immunotherapy free period correlated with the number of treatments received. Oral and/or rectal mesalamine (Mes.) was allowed during the trial, depending on clinical disease activity. Additional ("rescue") enemas (▲)

were allowed during the first 12 weeks of the trial (i.e. during the weaning course of FMTs). Inf.: infliximab; Pred.: prednisone.

**Figure 2. Correlation between Number of FMTs and the Immunotherapy Free Period.**

There was a significant ( $r=0.998$ , two tailed  $p=0.04$ ) correlation between the number of FMT rounds received, and the length of the immunotherapy free period (in days) in the 3 patients studied.

**Figure 3. Fecal Microbiota Shifts Following FMT.** Principle coordinates analysis of unweighted Unifrac distances (A.) revealed that microbial community changes during FMT (arrows connect pre-FMT [within 24 hours before first FMT] and post FMT [2-3 weeks after last FMT] samples from each patient) were not consistent within each patient (did not shift in the same direction for each patient), and post-FMT fecal communities of recipients (patients) following FMT were dissimilar from that of the donor ( $\blacktriangle$ : donor stool;  $\blacksquare$ : donor preparations from independent bowel movements on separate days). Microbial richness (B.) and diversity (C.) in terms of microbial taxa consistently increased following the FMT, although these trends did not reach statistical significance.

**Figure 4. Temporal Microbiome Shifts in Patient 1.** Principle coordinates analysis of unweighted Unifrac distances between patient 1 and the donor (stool and fecal preparations) showed that the recipient microbiomes became similar to that of the donor by 14, 28, and even 114 (2 weeks after last FMT received) days into the study. By day 150, the patient microbiome started to shift back to that before the start of the trial (Day 1).

**Figure 5. Epithelial Cell Mitosis Suppression Following FMT.** In 2 out of 3 patients, the numbers of epithelial mitoses (blinded examination of 500 epithelial cells) decreased by more than 50% following high intensity FMT. Mitoses were highlighted by histone (H3) immunohistochemistry (See Supplementary Appendix for details). Magnification 40x

**Supplement to:  
Serial Fecal Microbiota Transplantation Alters Mucosal Gene  
Expression in Pediatric Ulcerative Colitis**

**Table of Contents:**

|                                        |                                               |
|----------------------------------------|-----------------------------------------------|
| Supplementary methods                  | p. <del>2</del> - <del>8</del> <u>11</u>      |
| Supplementary Table 1                  | p. <del>9</del> <u>12</u>                     |
| Supplementary Table 2                  | p. <del>9</del> - <del>25</del> <u>12-28</u>  |
| Supplementary Table 3                  | p. <del>25</del> <u>28</u>                    |
| Supplementary Table 4                  | p. <del>26</del> - <del>27</del> <u>29-30</u> |
| Supplementary Table 5                  | p. <del>27</del> <u>30</u>                    |
| Supplementary <a href="#">Figure 1</a> | p. <del>28</del> - <del>31</del> - <u>32</u>  |
| <a href="#">Supplementary Figure 2</a> | <u>p.33</u>                                   |
| <a href="#">Supplementary Figure 3</a> | <u>p.34</u>                                   |
| <a href="#">Supplementary Figure 4</a> | <u>p.35</u>                                   |
| <a href="#">Supplementary Figure 5</a> | <u>p.36</u>                                   |
| <a href="#">Supplementary Figure 6</a> | <u>p.37-38</u>                                |
| <a href="#">Supplementary Figure 7</a> | <u>p.39</u>                                   |
| <a href="#">Supplementary Figure 8</a> | <u>p.40</u>                                   |
| References                             | p. <del>32</del> <u>41</u>                    |

## SUPPLEMENTARY METHODS

### FMT PROTOCOL

#### *Subject and Donor Recruitment*

Patients: Subjects were recruited from the patients treated by the Pediatric Gastroenterology, Hepatology, and Nutrition Section at Baylor College of Medicine/Texas Children's Hospital. Only patients whose clinical, endoscopic and histologic findings supported the diagnosis of UC were recruited. Only steroid, thiopurine, or biologic agent dependent patients were included following informed consent (i.e. "immunotherapy" dependent). Enrollees had to test negative for *Clostridium difficile* toxin by PCR, or enzyme immunoassay (EIA), and agree to withdraw all medications prior to and during the trial (see below). They also had to agree to a pre-treatment surgical consultation and acknowledge the potential need for colectomy, if disease exacerbations cannot be controlled by conventional medical therapy.

FMT Donors: Healthy adult stool donors (between 18 and 45 years of age) were recruited by the research staff following informed consent. Donors were asked to volunteer for the screening (pass a health questionnaire [Supplementary Table 4], serologic and stool tests [Supplementary Table 5]) and regularly supply stool samples according to the study protocol.

#### *FMT preparation*

The stool preparations were performed in the Texas Children's Microbiome Center (TCMC) in the Feigin Center, Texas Children's Hospital, Houston, Texas. This facility operates under Good Laboratory Practice (GLP) and is part of the clinical enterprise in the Department of Pathology, accredited by the College of American Pathologists (CAP) and certified by Clinical Laboratory Improvement Amendment (CLIA). Standard Operating Procedures on fecal specimen preparation and for decontamination procedures for biosafety cabinets and equipment were



followed before and after fecal preparation. Freshly collected stool specimens from the healthy adult donor (within 2 hours of passing) were delivered on ice for processing. Specimens were aliquoted to ~50 g aliquots, and cold sterile normal saline solution (NSS) was added prior to homogenization in a strainer bag with 500- $\mu$ m pore size (Seward Laboratory Systems Inc., Port Saint Lucie, FL) using the Smasher Laboratory Blender/Homogenizer (AES CHEMUNEX Inc., Cranbury, NJ). Sterile glycerol was added to filtered homogenized stool specimens containing the fecal microbiome at a final concentration of 10% according to Hamilton et al.<sup>1</sup> Stool preparations were immediately stored at -80°C until transplantation or analysis. All stool preparations were labeled with an expiration date 8 weeks from the date of preparation. At each FMT treatment, fecal preparations were rapidly thawed at 35°C in a water bath and used within 15 minutes. Sterile NSS was used as a diluent to reach the final volume of 250 ml from 50mg of original stool prior to delivery.

#### *Steps before FMT treatment*

Discontinuation or taper of UC therapy to initiation of FMTs: Subjects tapered their home medications for UC prior to the FMT protocol. Subjects did not have a history of antimicrobial therapy for at least 1 week prior to the initial pre-FMT colonoscopy. The corticosteroid dose was decreased to 50% of maintenance the day prior to the first pre-FMT colonoscopy. Thereafter, the dose was decreased by ~50% weekly over a maximum of 10 weeks following colonoscopy. The steroid taper was stopped once a patient's dose has been decreased to 5 mg/day for seven consecutive days. Immunomodulator and biologic treatments were discontinued for a minimum of 21 days prior to the FMT. Prebiotic or probiotic therapy were discontinued at least 1 week before the initiation of FMT. Oral or rectal treatments of mesalamine were stopped within a week of initiation of FMT. However, mesalamine preparations were allowed to be restarted in case of flares during the trial.

Surgical Consult: A surgical consultation was required prior to the initiation of FMT therapy. The subject and family were counseled with regard to possible worsening of symptoms and possible life-threatening conditions that may emerge, necessitating surgical and/or intensive care interventions.

Survey before the FMT therapy: Once a subject was enrolled in the trial, they completed a clinical symptoms survey. Only patients with remission or mild disease category (pediatric ulcerative colitis activity index;<sup>2</sup> PUCAI<35) were allowed to participate. We included patients with PUCAI <35 within 4 weeks of enrollment. However, all 3 patients in this report were in remission (PUCAI <10) at the start of the trial.

Initiation of FMT therapy and pre-colonoscopy preparation: One day prior to scheduled colonoscopy, subjects collected a stool sample and stored it at -20°C at home in an airtight container. The samples were brought to colonoscopy in a chilled container provided for collection and transport within 24 hours of collection and stored at -80°C. After the stool sample was obtained, the subjects started the institution's standard for colonoscopy preparation regimen with Miralax.

#### *FMT treatment protocol*

Initial colonoscopy and FMT treatment (Day 1): At the time of colonoscopy, an assessment for macroscopic colitis using the Mayo classification was performed. Biopsies were obtained from the rectosigmoid and cecum in an ascending fashion for routine histopathology and research purposes. Following mucosal sampling, subjects underwent FMT with 250 ml of thawed stool preparation, 1/3 of which was endoscopically administered into the terminal ileum and 2/3 into the right colon as targeted site as found feasible by Brandt and colleagues.<sup>3</sup>

Subsequent FMT Treatments: The duration of FMT therapy was planned to be 12 weeks.

Days 2 through 14: Subjects came to the ambulatory clinic daily for clinical symptom evaluation and fecal retention enema administration (60-250 ml rectally [as tolerated] with retention for at least 30 minutes).

Days 15 through 28: Enemas were given 3 times a week on weeks 3 and 4 of the protocol.

Days 29-84 (2 to 3 months): Enemas were given weekly for a total of 3-8 weeks (less than 8 secondary to the cessation of the protocol according to the FDA mandate).

As supportive care, patients were allowed to take 4 mg (2 tablets of over the counter Imodium) loperamide by mouth 15-30 minutes prior to enema treatments to help retain the preparation.

This dose of loperamide is appropriate for the age group. Loperamide is over-the-counter and FDA approved for the treatment of inflammatory bowel disease associated diarrhea.

Response and progression was monitored by PUCAI during the protocol. The clinical symptoms survey was performed prior to each enema delivery and a disease progression table was recorded for each enrolled patient.

#### *Follow-up*

##### Follow-up colonoscopy/sigmoidoscopy, sample collection and evaluation

Two weeks after the last weekly enema, colonoscopy with FMT was performed for patient 1. For the consecutive patients, we decided to perform flexible sigmoidoscopy without prior colon cleansing and those patients did not receive additional FMT. Stool samples were collected within one day of sigmoidoscopy. At the time of sigmoidoscopy, an assessment for macroscopic colitis using the Mayo classification was performed. Biopsies were obtained from the rectosigmoid area for routine histopathology and research purposes.

#### DETAILED CASE REPORTS

The patients were enrolled into an Institutional Review Board (IRB) approved clinical trial prior to the Food and Drug Administration (FDA) mandating the need for an investigational drug application for FMT (that is not directed towards the treatment of recurrent CDI). The protocol was stopped after the FDA mandate was issued in May of 2013. Therefore, only 1 patient (patient 1) completed the full 12 week course (28 scheduled treatments + “rescue” enemas if clinically indicated) of FMT. The clinical course of patients is shown in Supplementary Figure 1.

Patient 1: A 16-year-old male was diagnosed with pancolitis (Mayo score<sup>4</sup>=2; Supplementary Figure 3) one year before enrollment. His prior therapy included infliximab, oral corticosteroids and mesalamine. He was weaned off oral steroids and continued on infliximab infusions with oral mesalamine. FMT was initiated when he was in clinical (pediatric ulcerative colitis activity index;<sup>2</sup> PUCAI=5), macroscopic (Supplementary Figure 3), and microscopic (Supplementary Figure 4) remission after 6 weeks without infliximab. Thirty (30) treatments were administered during 3 months. He received mesalamine enemas twice for mild exacerbations (PUCAI ≥15). The patient remained in clinical remission (PUCAI <10) for more than 90% (65/70 days) of the treatment course (Supplementary Figure 1A). No adverse events were noted. A follow-up endoscopy 3 weeks after the last FMT showed the entire colon to be grossly normal (Supplementary Figure 3). However, histological inflammation in his transverse colon was detected, and maintenance oral mesalamine therapy was started. The patient remained in clinical remission (symptom-free, lab values within normal ranges, including fecal calprotectin) for 8 months (261 days) after his last infliximab treatment, 4 months (126 days) after his last FMT. At this time, he developed a mild disease flare (PUCAI=25) and wished to go back on infliximab therapy. He has intermittent breakthrough symptoms on 7.5 mg/kg infliximab every 6 weeks and daily mesalamine treatments for over 1.5 years since re-institution of the biologic agent.

Patient 2: A 15-year-old male with a history of UC with pan-colitis (Mayo: 2; Supplementary Figure 3) was treated for more than one year with 6-mercaptopurine (6MP), allopurinol, and daily oral mesalamine. He tested positive for toxigenic *Clostridium difficile* infection (CDI) at enrollment. Metronidazole therapy successfully cleared the CDI prior to starting FMT. Allopurinol and 6MP were stopped 3 weeks prior to initiation of FMT. Initial colonoscopy showed mildly active colitis (Mayo: 1; Supplementary Figure 3) with histological inflammation (Supplementary Figure 4) throughout the colon. Mesalamine was stopped on day 6 after initiation of FMT. The patient remained in remission throughout FMT therapy (Supplementary Figure 1B). Twenty-five FMT treatments were administered to this patient, and no adverse events were noted. The colon was grossly normal by sigmoidoscopy performed 2 weeks after the final FMT (Mayo 0; Supplementary Figure 3). No evidence of mucosal inflammation in the colon was found by histology (Supplementary Figure 4). This patient remained in remission (PUCAI<10) without any therapy for more than 2 months (80 days after last FMT, 159 days after last 6MP dose). However, he became symptomatic (PUCAI=35) and did not respond to oral mesalamine therapy following this symptom-free period. Pulse steroid treatments were initiated, and he required intermittent low dose steroid therapy with 4-5 week steroid-free intervals. The patient re-enrolled into our FMT trial 1 year afterwards, and is currently in remission off of any therapy following a second course of FMTs for more than 2 months after last FMT with normal fecal calprotectin level.

Patient 3: A 14-year-old female was diagnosed with severely active pancolitis four months prior to enrollment (Mayo 3, Supplementary Figure 3). She could not be weaned off steroids for more than 4 week intervals, and she opted to enroll into the FMT trial. Steroids were tapered during the first 10 days of FMT treatment, and mesalamine was stopped on day 14. She remained in remission during the FMT period (Supplementary Figure 1C). She received 22 rounds of FMT

with only one episode of moderate, self-resolving, positional headache noted. Sigmoidoscopy 2 weeks after the last FMT showed a grossly normal (Mayo 0) colon. No evidence of colonic mucosal inflammation was found by histology. She developed a flare during travel 4 weeks following the last FMT (PUCAI=20). Oral mesalamine successfully induced remission. She repeatedly became symptomatic with bloody stools and cramping (PUCAI=50) 11 weeks (79 days) after the last FMT (105 days after last steroid dose), at which time pulse steroid therapy was initiated. She remained steroid dependent following re-initiation of steroid therapy. The patient re-enrolled into our FMT trial 1 year afterwards, but was withdrawn from the study for worsening symptoms and eventually opted for colectomy after 2 months of steroid therapy.

#### MICROBIOME ANALYSES

Fecal microbiome characterization: Stool samples were processed by the Texas Children's Microbiome Center (Texas Children's Hospital, Houston, TX, USA) for DNA extraction and sequencing. Community DNA was extracted from each specimen using the PowerSoil DNA isolation kit (Mo Bio Laboratories, Carlsbad, CA, USA), following manufacturer's instructions. The resulting DNA was quantified using both a NanoDrop-1000 spectrophotometer (NanoDrop, Wilmington, DE, USA) and Qubit fluorometer (Life Technologies Corporation, Carlsbad, CA, USA). Barcoded universal primers 357F (5'-CCTACGGGAGGCAGCAG-3') and 926R (5'-CCGTCAATTCMTTTRAGT-3') were used to amplify the V3V5 region of the bacterial *16S rRNA* gene. Each library construct was then processed and purified for 454 sequencing. Sequencing was performed on the Roche GS FLX 454 sequencer (454 Life Sciences, Branford, CT, USA).

Data analysis: Sequence data was parsed by barcode and quality filtered using QIIME (version 1.3.0),<sup>5</sup> as implemented in the Genboree Microbiome Toolset.<sup>6</sup> Sequences shorter than 200 bp length, having average quality scores less than 20, harboring ambiguous base calls, or having

mismatches to their barcode or sequencing primer were excluded from further analysis. Both the barcodes and sequencing primers were trimmed away, and the remaining sequences from the donor and patients were pooled and assigned to operational taxonomic units (OTUs) at a similarity cut off of 97% using Cd-hit.<sup>7</sup> The data set was screened for potential chimeras using the ChimeraSlayer algorithm<sup>8</sup>, and all potential chimeras were excluded from downstream analysis. Identities were assigned to each OTU using the Ribosomal Database Project Classifier.<sup>9</sup> Given variation in sequencing depth, the 16S rRNA gene libraries were sub-sampled to an equal depth (i.e., 2600 sequences per library) prior to the evaluation of richness or calculation of diversity indices, including the Shannon diversity index and unweighted UniFrac distance measures. The results from the microbiome characterization of the donor were compared to the microbiome of the patients pre-transplant and at 2-weeks following the end of FMT therapy.

The sequences generated for this project were deposited in the NCBI Sequence Read Archive (SRA) under project accession SRP034948

#### RNA SEQUENCING AND ANALYSES

Total RNA was isolated from rectal biopsy specimens (stored in RNALater™ [Ambion through Life Technologies, Carlsbad, California]) according to the manufacturer's recommendation, with Trizol (15596, Life Technologies) and the RNeasy Mini Kit (74106, Qiagen). RNA samples were stored at -80°C until processing for RNA sequencing.

RNA samples from colon biopsies were QCed by spectrophotometry (NanoDrop-1000 Spectrophotometer, Thermo Fisher Scientific, Waltham, MA, U.S.A.) and microfluidic electrophoresis (Experion Automated Electrophoresis System, Bio-Rad Laboratories, Hercules, CA). PolyA-selected libraries were prepared from total RNA samples with TruSeq RNA Sample Preparation Kits (Illumina, San Diego, CA). Cluster generation was performed with Illumina

TruSeq SR Cluster Kits v3 - cBot – HS, in a cBot Cluster Generation System and 100 bp paired-end-sequencing using Illumina TruSeq SBS Kits on an Illumina HiSeq 2000 Sequencing System resulting in mean sequencing depth of 160 million (101-213 million) reads per sample. CASAVA software (Illumina) was used to convert raw read data to fastq format. Sequencing reads were trimmed for quality ( $q < 20$ ) and adapters and then aligned to the human genome (GRCh37/hg19) using Tophat<sup>9</sup>. Cufflinks<sup>10</sup> was used for estimation of transcript abundances based on Fragments Per Kilobase of exon per Million fragments mapped (FPKM). Differential expression analysis was carried out using Cuffdiff, which calculates a test statistic based on the log ratio of a gene's expression in two conditions against the log of one. Multiple testing correction at a false discovery rate  $< 0.05$  was applied to identify differentially expressed genes. The raw data was made publically accessible in Bioproject:

<http://www.ncbi.nlm.nih.gov/bioproject/253048>

## HISTOLOGY

The biopsy specimens were examined by a board-certified pediatric pathologist with expertise in GI pathology who was blinded to previously reported histology reports. The specimens were fixed in 10% neutral buffered formalin immediately following endoscopy. The tissue samples were routinely processed and paraffin embedded. Paraffin sections (3 micron) were cut and stained with hematoxylin and eosin (H&E) with eight tissue sections on one slide. Duplicated 3 micron sections were stained for histone (H3) via immunohistochemistry using a polyclonal rabbit anti-human histone (06-570; Millipore, Billerica, Massachusetts). After pretreatment with HIER1 (Bond Epitope Retrieval Solution 1) for 30 minutes at 100 degrees Fahrenheit, the specimens were incubated with the primary antibody dilution 1:800 at room temperature for 15 minutes. The detection system used was the Novocastra Bond Polymer Refine Detection System (biotin-free, peroxide conjugated) from LEICA, Newcastle upon Tyne, United Kingdom

10



with diaminobenzidine tetrahydrochloride (DAB) as the chromogen and hematoxylin as the counterstain.

### **STATISTICAL ANALYSES**

The two-tailed paired t-test was used for group comparisons. Significance was relaxed to an arbitrary  $p < 0.25$  for OTU comparisons; otherwise it was determined at  $p < 0.05$ . The Pearson correlation coefficient was calculated in Excel (Microsoft Office Excel 2007). Statistical significance of correlations was calculated with public Statistics Calculator version 3.0 (<http://www.danielsoper.com/statcalc3/calc.aspx?id=44>) and determined at  $p < 0.05$ . See Methods section in Supplementary Appendix for bioinformatic analyses applied to the RNA sequencing data.

## SUPPLEMENTARY TABLES

| #OTU ID | Lowest taxonomic assignment | Before FMT (%) | After FMT (%) | Average change in abundance (%) | Average in donor preparations (%) |
|---------|-----------------------------|----------------|---------------|---------------------------------|-----------------------------------|
| 1179    | Lachnospiraceae             | 1.538          | 6.205         | 4.667                           | 0.404                             |
| 1164    | Lachnospiraceae             | 0.218          | 3.423         | 3.205                           | 0.115                             |
| 1406    | Dorea                       | 0.705          | 3.590         | 2.885                           | 0.096                             |
| 1886    | Lachnospiraceae             | 0.205          | 1.885         | 1.679                           | 0.000                             |
| 1894    | Lachnospiraceae             | 0.038          | 1.474         | 1.436                           | 0.000                             |
| 925     | Ruminococcaceae             | 0.282          | 1.154         | 0.872                           | 0.462                             |
| 1929    | Lachnospiraceae             | 0.013          | 0.410         | 0.397                           | 0.058                             |
| 577     | Faecalibacterium            | 0.000          | 0.321         | 0.321                           | 0.000                             |
| 1094    | Lachnospiraceae             | 0.000          | 0.295         | 0.295                           | 0.000                             |
| 1259    | Ruminococcaceae             | 0.000          | 0.115         | 0.115                           | 0.000                             |
| 1135    | Lachnospiraceae             | 0.000          | 0.064         | 0.064                           | 0.000                             |
| 423     | Collinsella                 | 0.000          | 0.051         | 0.051                           | 0.000                             |
| 1081    | Lachnospiraceae             | 0.000          | 0.051         | 0.051                           | 0.000                             |
| 616     | Ruminococcaceae             | 0.051          | 0.013         | -0.038                          | 0.000                             |
| 1605    | Streptococcus               | 1.244          | 0.192         | -1.051                          | 0.365                             |

**Supplementary Table 1:** Consistent abundance (%) changes in Operational Taxonomic Units (OTUs) with lowest taxonomic assignment in the fecal microbiomes upon the FMT series in all 3 patients. Before and after values are average abundances from the 3 patients before and 2 weeks after the FMTs

| Gene_id         | Gene              | Expression change | q_value |
|-----------------|-------------------|-------------------|---------|
| ENSG00000137757 | FOLH1B            | 0.004             | 0.008   |
| ENSG00000075856 | CXCL5             | 0.010             | 0.000   |
| ENSG00000064607 | FSIP1             | 0.026             | 0.019   |
| ENSG00000026508 | SAA2              | 0.029             | 0.004   |
| ENSG00000069493 | SAA1              | 0.037             | 0.000   |
| ENSG00000121152 | RP11-124L5.7.1    | 0.052             | 0.012   |
| ENSG00000126091 | RC3H2             | 0.083             | 0.013   |
| ENSG00000114742 | TNIP3             | 0.084             | 0.002   |
| ENSG00000065361 | AC027323.1,LYSMD3 | 0.099             | 0.000   |
| ENSG00000131236 | PGLYRP4           | 0.110             | 0.024   |
| ENSG00000075785 | SLC6A20           | 0.169             | 0.001   |
| ENSG00000106392 | TNFSF15           | 0.171             | 0.031   |
| ENSG00000198498 | MTX3              | 0.179             | 0.000   |
| ENSG00000111224 | IL19              | 0.181             | 0.021   |
| ENSG00000113593 | TNFRSF6B          | 0.186             | 0.013   |
| ENSG00000125885 | FPR1              | 0.191             | 0.033   |

|                 |                       |       |       |
|-----------------|-----------------------|-------|-------|
| ENSG00000111711 | ALPL                  | 0.196 | 0.000 |
| ENSG00000196517 | FCGR3B                | 0.197 | 0.025 |
| ENSG00000162747 | AC131025.8.1,MIR143HG | 0.204 | 0.007 |
| ENSG00000141076 | IL6STP1               | 0.206 | 0.032 |
| ENSG00000136824 | RP11-173P15.3.1       | 0.214 | 0.011 |
| ENSG00000130881 | RP11-622O11.2.1       | 0.224 | 0.040 |
| ENSG00000122786 | KCND3                 | 0.229 | 0.001 |
| ENSG00000261804 | MCM10                 | 0.229 | 0.020 |
| ENSG00000108424 | ANKRD36BP1            | 0.231 | 0.003 |
| ENSG00000163482 | AC110491.1            | 0.233 | 0.025 |
| ENSG00000243955 | TFPI2                 | 0.236 | 0.020 |
| ENSG00000173200 | SKA3                  | 0.237 | 0.003 |
| ENSG00000117600 | CREB3L3               | 0.238 | 0.000 |
| ENSG00000184575 | WASF3                 | 0.239 | 0.001 |
| ENSG00000172269 | PHKA1P1               | 0.240 | 0.048 |
| ENSG00000100934 | GPR155                | 0.254 | 0.002 |
| ENSG00000169398 | PRSS21                | 0.258 | 0.042 |
| ENSG00000138780 | TPO                   | 0.259 | 0.038 |
| ENSG00000188529 | THEMIS                | 0.259 | 0.006 |
| ENSG00000214331 | TRIM40                | 0.266 | 0.000 |
| ENSG00000134851 | OLFM4                 | 0.266 | 0.019 |
| ENSG00000149150 | ST3GAL3               | 0.269 | 0.000 |
| ENSG00000165118 | HIN1L.1               | 0.272 | 0.038 |
| ENSG00000104164 | RP11-44F14.2.1        | 0.274 | 0.048 |
| ENSG00000160949 | CXCL1                 | 0.277 | 0.019 |
| ENSG00000109685 | HS3ST2                | 0.281 | 0.000 |
| ENSG00000197056 | CDC7                  | 0.285 | 0.001 |
| ENSG00000165689 | ADAMTS1               | 0.290 | 0.007 |
| ENSG00000103197 | RSAD2                 | 0.292 | 0.003 |
| ENSG00000115159 | PADI1                 | 0.294 | 0.046 |
| ENSG00000090924 | RP11-1220K2.2.1       | 0.297 | 0.010 |
| ENSG00000241878 | ERO1L                 | 0.298 | 0.000 |
| ENSG00000140575 | CDCA2                 | 0.304 | 0.046 |
| ENSG00000160818 | MTF1                  | 0.308 | 0.019 |
| ENSG00000147454 | SHCBP1                | 0.309 | 0.019 |
| ENSG00000188786 | GVINP1                | 0.310 | 0.005 |
| ENSG00000114770 | DDX21                 | 0.311 | 0.006 |
| ENSG00000198373 | RAD54L2               | 0.312 | 0.001 |
| ENSG00000133816 | CXCL3                 | 0.315 | 0.001 |
| ENSG00000221955 | ZBTB41                | 0.318 | 0.002 |
| ENSG00000157349 | WDHD1                 | 0.320 | 0.001 |
| ENSG00000131149 | TRAT1                 | 0.321 | 0.046 |
| ENSG00000183814 | TET3                  | 0.323 | 0.001 |
| ENSG00000077809 | RASGRF2               | 0.326 | 0.036 |
| ENSG00000156990 | ANLN                  | 0.333 | 0.000 |
| ENSG00000104388 | PMAIP1                | 0.334 | 0.027 |
| ENSG00000112812 | XRN1                  | 0.334 | 0.007 |

|                 |                 |       |       |
|-----------------|-----------------|-------|-------|
| ENSG00000156931 | ARPP19          | 0.336 | 0.041 |
| ENSG00000156976 | ATF7IP          | 0.341 | 0.000 |
| ENSG00000113140 | C6orf223        | 0.341 | 0.048 |
| ENSG00000163820 | CTPS            | 0.342 | 0.000 |
| ENSG00000119950 | RP11-356C4.4.1  | 0.344 | 0.034 |
| ENSG00000120756 | FAM111B         | 0.345 | 0.000 |
| ENSG00000087586 | SUV39H2         | 0.346 | 0.002 |
| ENSG00000166912 | CHI3L1          | 0.348 | 0.005 |
| ENSG00000243943 | HAS3            | 0.348 | 0.015 |
| ENSG00000198431 | ENAH            | 0.348 | 0.000 |
| ENSG00000163655 | CALD1           | 0.350 | 0.002 |
| ENSG00000130653 | ORC6            | 0.352 | 0.000 |
| ENSG00000198964 | CDC45           | 0.353 | 0.004 |
| ENSG00000102901 | CD28            | 0.353 | 0.020 |
| ENSG00000107566 | XRCC2           | 0.353 | 0.029 |
| ENSG00000079246 | NAV2            | 0.353 | 0.033 |
| ENSG00000169251 | SOCS3           | 0.355 | 0.033 |
| ENSG00000113240 | FSD1L           | 0.356 | 0.030 |
| ENSG00000122188 | SYNPO2          | 0.357 | 0.000 |
| ENSG00000184220 | RCAN3           | 0.357 | 0.007 |
| ENSG00000021762 | CHEK1           | 0.359 | 0.000 |
| ENSG00000160072 | CASP5           | 0.360 | 0.000 |
| ENSG00000141682 | PRDM1           | 0.361 | 0.000 |
| ENSG00000133789 | SCD             | 0.362 | 0.023 |
| ENSG00000070269 | PTPRC           | 0.365 | 0.000 |
| ENSG00000135829 | FSTL1           | 0.366 | 0.000 |
| ENSG00000163714 | MCM4            | 0.367 | 0.000 |
| ENSG00000175216 | C4BPB           | 0.368 | 0.003 |
| ENSG00000143537 | HELLS           | 0.368 | 0.004 |
| ENSG00000143507 | ACTG2           | 0.371 | 0.001 |
| ENSG00000018699 | DDX3Y           | 0.371 | 0.002 |
| ENSG00000089280 | RP11-343J24.1.1 | 0.373 | 0.015 |
| ENSG00000165480 | CDC25A          | 0.374 | 0.024 |
| ENSG00000176945 | GUCY1A3         | 0.375 | 0.047 |
| ENSG00000164180 | CHL1            | 0.377 | 0.044 |
| ENSG00000101057 | ATM             | 0.378 | 0.002 |
| ENSG00000097046 | ST3GAL1         | 0.378 | 0.006 |
| ENSG00000177192 | CLMP            | 0.379 | 0.040 |
| ENSG00000142224 | RTEL1.1         | 0.380 | 0.000 |
| ENSG00000138074 | CDC6            | 0.385 | 0.030 |
| ENSG00000006652 | RRM2            | 0.385 | 0.000 |
| ENSG00000068438 | ITGAL           | 0.387 | 0.000 |
| ENSG00000154451 | PHIP            | 0.390 | 0.015 |
| ENSG00000100890 | SLFN5           | 0.393 | 0.025 |
| ENSG00000148926 | FCRL1           | 0.393 | 0.000 |
| ENSG00000103111 | SMC4            | 0.394 | 0.000 |
| ENSG00000148308 | MS4A14          | 0.396 | 0.034 |

|                 |                     |       |       |
|-----------------|---------------------|-------|-------|
| ENSG00000086015 | PLEKHH2             | 0.397 | 0.050 |
| ENSG00000055732 | AHR                 | 0.398 | 0.019 |
| ENSG00000105993 | PARP15              | 0.399 | 0.001 |
| ENSG00000146670 | ZFY                 | 0.399 | 0.022 |
| ENSG00000204394 | FAM169A             | 0.400 | 0.014 |
| ENSG00000168488 | CSF3R               | 0.404 | 0.005 |
| ENSG00000116539 | RRM1                | 0.405 | 0.000 |
| ENSG00000111912 | RGS5                | 0.405 | 0.005 |
| ENSG00000166923 | CDCA5               | 0.406 | 0.007 |
| ENSG00000137497 | SLC7A6              | 0.406 | 0.000 |
| ENSG00000170581 | RP4-788L13.1.1      | 0.408 | 0.019 |
| ENSG00000121281 | CTDSPL2             | 0.409 | 0.012 |
| ENSG00000094841 | ATAD2               | 0.411 | 0.024 |
| ENSG00000129422 | NF1                 | 0.411 | 0.000 |
| ENSG00000114127 | CENPK               | 0.412 | 0.000 |
| ENSG00000160796 | GREM1               | 0.412 | 0.000 |
| ENSG00000091436 | IL1RN               | 0.413 | 0.008 |
| ENSG00000171051 | KIT                 | 0.413 | 0.042 |
| ENSG00000177034 | SLC38A7             | 0.416 | 0.027 |
| ENSG00000105483 | LMO7                | 0.417 | 0.000 |
| ENSG00000174574 | BIRC3               | 0.417 | 0.000 |
| ENSG00000082153 | MS4A1               | 0.419 | 0.000 |
| ENSG00000164244 | BLM                 | 0.419 | 0.013 |
| ENSG00000134369 | SPAG9               | 0.420 | 0.004 |
| ENSG00000152455 | RTEL1,TNFRSF6B      | 0.423 | 0.014 |
| ENSG00000117228 | RP11-904M10.1.1     | 0.424 | 0.017 |
| ENSG00000136560 | GBP5                | 0.424 | 0.000 |
| ENSG00000204120 | ZNF169              | 0.424 | 0.011 |
| ENSG00000168071 | NEDD1               | 0.426 | 0.000 |
| ENSG00000169679 | KIF18B              | 0.426 | 0.003 |
| ENSG00000157212 | FAM55B              | 0.427 | 0.004 |
| ENSG00000164649 | CTA-286B10.7.1,MCM5 | 0.427 | 0.000 |
| ENSG00000196873 | MEF2C               | 0.427 | 0.010 |
| ENSG00000123562 | MEST                | 0.427 | 0.000 |
| ENSG00000163017 | TXNRD1              | 0.428 | 0.000 |
| ENSG00000177888 | PDP1                | 0.428 | 0.046 |
| ENSG00000250251 | REL                 | 0.428 | 0.020 |
| ENSG00000198121 | C3orf26             | 0.428 | 0.001 |
| ENSG00000112701 | DHFR                | 0.431 | 0.012 |
| ENSG00000013561 | FCRL3               | 0.431 | 0.016 |
| ENSG00000163519 | MCM6                | 0.432 | 0.002 |
| ENSG00000092439 | B3GALT1             | 0.434 | 0.000 |
| ENSG00000131504 | NCOA7,RP11-73O6.4.1 | 0.437 | 0.000 |
| ENSG00000132466 | GBP1                | 0.439 | 0.001 |
| ENSG00000148175 | TRANK1              | 0.439 | 0.003 |
| ENSG00000138398 | DOCK2               | 0.440 | 0.006 |
| ENSG00000118495 | SMC1A               | 0.442 | 0.002 |

|                 |           |       |       |
|-----------------|-----------|-------|-------|
| ENSG00000167522 | PARP11    | 0.442 | 0.003 |
| ENSG00000086666 | SLFN13    | 0.442 | 0.002 |
| ENSG00000140403 | KYNU      | 0.443 | 0.025 |
| ENSG00000166927 | NCAPG     | 0.443 | 0.007 |
| ENSG00000182866 | ACSL4     | 0.443 | 0.036 |
| ENSG00000215837 | BANK1     | 0.444 | 0.013 |
| ENSG00000138032 | NFAT5     | 0.449 | 0.013 |
| ENSG00000132142 | CYR61     | 0.450 | 0.010 |
| ENSG00000104205 | TLE4      | 0.451 | 0.009 |
| ENSG00000143297 | RNASEH1   | 0.451 | 0.000 |
| ENSG00000163635 | PRKAA1    | 0.452 | 0.001 |
| ENSG00000138764 | GSTCD     | 0.452 | 0.030 |
| ENSG00000099917 | SCFD2     | 0.454 | 0.026 |
| ENSG00000143811 | HEG1      | 0.455 | 0.047 |
| ENSG00000204713 | SVEP1     | 0.456 | 0.025 |
| ENSG00000159618 | CEP135    | 0.456 | 0.006 |
| ENSG00000175643 | MCM8      | 0.456 | 0.000 |
| ENSG00000135486 | GART      | 0.456 | 0.000 |
| ENSG00000124839 | AKAP2     | 0.457 | 0.037 |
| ENSG00000143337 | S1PR1     | 0.459 | 0.021 |
| ENSG00000166411 | DEK       | 0.459 | 0.000 |
| ENSG00000196159 | LCP1      | 0.460 | 0.005 |
| ENSG00000145041 | ATXN7     | 0.460 | 0.022 |
| ENSG00000214262 | CIITA     | 0.461 | 0.001 |
| ENSG00000213430 | LONP2     | 0.461 | 0.000 |
| ENSG00000079385 | IL7R      | 0.461 | 0.035 |
| ENSG00000168610 | KIF24     | 0.462 | 0.041 |
| ENSG00000140968 | DUSP10    | 0.463 | 0.002 |
| ENSG00000136699 | SSX2IP    | 0.463 | 0.000 |
| ENSG00000049130 | PDE7A     | 0.464 | 0.000 |
| ENSG00000140395 | ACACA     | 0.465 | 0.001 |
| ENSG00000100030 | SAMD4A    | 0.466 | 0.010 |
| ENSG00000106546 | GTPBP1    | 0.466 | 0.002 |
| ENSG00000110104 | CFB       | 0.467 | 0.000 |
| ENSG00000170144 | CIRH1A    | 0.467 | 0.000 |
| ENSG00000140263 | MCM2      | 0.469 | 0.001 |
| ENSG00000013503 | CTTNBP2NL | 0.469 | 0.003 |
| ENSG00000113368 | ITGA4     | 0.469 | 0.028 |
| ENSG00000065328 | IMPAD1    | 0.469 | 0.048 |
| ENSG00000122420 | MSH6      | 0.470 | 0.004 |
| ENSG00000182271 | SNHG3     | 0.470 | 0.020 |
| ENSG00000154153 | RFC5      | 0.471 | 0.000 |
| ENSG00000077147 | LMNB1     | 0.471 | 0.000 |
| ENSG00000005483 | DAPP1     | 0.472 | 0.000 |
| ENSG00000172673 | DIAPH3    | 0.473 | 0.004 |
| ENSG00000138772 | PCGF3     | 0.473 | 0.034 |
| ENSG00000256364 | GPRIN1    | 0.473 | 0.009 |

|                 |                 |       |       |
|-----------------|-----------------|-------|-------|
| ENSG00000127603 | KITLG           | 0.474 | 0.029 |
| ENSG00000147649 | STARD4          | 0.474 | 0.003 |
| ENSG00000095564 | WDR43           | 0.474 | 0.005 |
| ENSG00000198901 | NUP107          | 0.474 | 0.000 |
| ENSG00000115282 | FILIP1L         | 0.475 | 0.041 |
| ENSG00000081026 | GNL3L           | 0.475 | 0.001 |
| ENSG00000116649 | CNN1            | 0.475 | 0.000 |
| ENSG00000024526 | MAVS            | 0.475 | 0.006 |
| ENSG00000134453 | LIN9            | 0.477 | 0.000 |
| ENSG00000232882 | NT5C2           | 0.477 | 0.007 |
| ENSG00000157827 | ADCY7           | 0.478 | 0.019 |
| ENSG00000114346 | RP11-252A24.2.1 | 0.479 | 0.046 |
| ENSG00000102837 | FGD2            | 0.479 | 0.000 |
| ENSG00000160688 | TMEM97          | 0.479 | 0.000 |
| ENSG00000140718 | RAD51AP1        | 0.480 | 0.003 |
| ENSG00000154237 | WDFY1           | 0.482 | 0.034 |
| ENSG00000198554 | NBPF8           | 0.483 | 0.048 |
| ENSG00000156804 | CDK1            | 0.484 | 0.043 |
| ENSG00000139641 | TCF7            | 0.485 | 0.013 |
| ENSG00000160703 | LYN             | 0.485 | 0.025 |
| ENSG00000105568 | LEF1            | 0.485 | 0.027 |
| ENSG00000162599 | FCGR3A          | 0.486 | 0.000 |
| ENSG00000172318 | FAM55C          | 0.486 | 0.011 |
| ENSG00000090316 | EPB41L2         | 0.486 | 0.000 |
| ENSG00000085449 | MAP3K8          | 0.487 | 0.037 |
| ENSG00000109919 | TEAD4           | 0.487 | 0.002 |
| ENSG00000145908 | NPAS2           | 0.487 | 0.002 |
| ENSG00000130826 | RMI2            | 0.488 | 0.017 |
| ENSG00000206053 | NOLC1           | 0.488 | 0.027 |
| ENSG00000197905 | EHF             | 0.488 | 0.034 |
| ENSG00000179978 | RALGPS2         | 0.489 | 0.025 |
| ENSG00000115239 | USP45           | 0.489 | 0.021 |
| ENSG00000139842 | PHF20L1         | 0.489 | 0.002 |
| ENSG00000125962 | RAB5B           | 0.489 | 0.012 |
| ENSG00000196584 | SERPINE2        | 0.489 | 0.000 |
| ENSG00000162692 | AASS            | 0.489 | 0.034 |
| ENSG00000181163 | SGK3            | 0.490 | 0.004 |
| ENSG00000172403 | TNPO1           | 0.490 | 0.003 |
| ENSG00000256667 | PRRC2B          | 0.490 | 0.000 |
| ENSG00000102606 | FGR             | 0.491 | 0.000 |
| ENSG00000136167 | JAK3            | 0.491 | 0.022 |
| ENSG00000168685 | SMC2            | 0.491 | 0.000 |
| ENSG00000079819 | MSL2            | 0.492 | 0.045 |
| ENSG00000109084 | RPS6KA3         | 0.492 | 0.035 |
| ENSG00000237683 | BUB1            | 0.492 | 0.006 |
| ENSG00000128928 | RP11-261C10.3.1 | 0.493 | 0.023 |
| ENSG00000168016 | RAPGEF2         | 0.493 | 0.022 |

|                 |              |       |       |
|-----------------|--------------|-------|-------|
| ENSG0000006744  | ARHGAP11A    | 0.494 | 0.045 |
| ENSG00000136286 | RACGAP1      | 0.494 | 0.017 |
| ENSG00000072501 | MCOLN3       | 0.494 | 0.008 |
| ENSG00000166197 | MYBL2        | 0.494 | 0.041 |
| ENSG00000116353 | SEC23A       | 0.495 | 0.003 |
| ENSG00000163735 | PNPT1        | 0.495 | 0.000 |
| ENSG00000088247 | HAPLN3       | 0.496 | 0.031 |
| ENSG00000093009 | ECT2         | 0.496 | 0.000 |
| ENSG00000146192 | DYNC1LI2     | 0.496 | 0.005 |
| ENSG00000196712 | POLD3        | 0.496 | 0.005 |
| ENSG00000138756 | NAV1         | 0.497 | 0.027 |
| ENSG00000137824 | PLS1         | 0.497 | 0.001 |
| ENSG00000143033 | SLC5A6       | 0.497 | 0.000 |
| ENSG00000137770 | HERC3        | 0.498 | 0.012 |
| ENSG00000132356 | ARHGAP42     | 0.498 | 0.002 |
| ENSG00000132780 | COL12A1      | 0.498 | 0.048 |
| ENSG00000029363 | LILRB1       | 0.499 | 0.015 |
| ENSG00000112096 | AC013461.1.1 | 0.499 | 0.049 |
| ENSG00000115919 | PKD1P6       | 0.500 | 0.019 |
| ENSG00000137504 | SECISBP2L    | 0.500 | 0.011 |
| ENSG00000126226 | RFC4         | 0.501 | 0.000 |
| ENSG00000203710 | MGA          | 0.501 | 0.003 |
| ENSG00000145725 | GLIPR1       | 0.501 | 0.022 |
| ENSG00000136319 | BCLAF1       | 0.501 | 0.000 |
| ENSG00000073417 | PLDN         | 0.502 | 0.006 |
| ENSG00000080189 | PFAS         | 0.503 | 0.000 |
| ENSG00000130723 | FTO          | 0.503 | 0.027 |
| ENSG00000164506 | GEN1         | 0.504 | 0.000 |
| ENSG00000177479 | UBQLN1       | 0.504 | 0.004 |
| ENSG00000166803 | EXOC5        | 0.504 | 0.009 |
| ENSG00000114857 | SLAMF1       | 0.505 | 0.001 |
| ENSG00000171385 | STOM         | 0.505 | 0.015 |
| ENSG00000049449 | YIPF6        | 0.506 | 0.034 |
| ENSG00000093183 | FBXO32       | 0.506 | 0.000 |
| ENSG00000259141 | LMBR1        | 0.508 | 0.004 |
| ENSG00000138795 | GPD2         | 0.508 | 0.048 |
| ENSG00000168918 | PLEKHG2      | 0.508 | 0.007 |
| ENSG00000197157 | POLK         | 0.508 | 0.000 |
| ENSG00000203879 | TTC5         | 0.509 | 0.008 |
| ENSG00000163734 | ZNF268       | 0.509 | 0.000 |
| ENSG00000135316 | PRKD3        | 0.512 | 0.036 |
| ENSG00000257743 | WDR76        | 0.512 | 0.012 |
| ENSG00000115232 | TAF1A        | 0.513 | 0.019 |
| ENSG00000116521 | CD44         | 0.513 | 0.000 |
| ENSG00000104331 | PBK          | 0.513 | 0.008 |
| ENSG00000145734 | FAM126B      | 0.514 | 0.024 |
| ENSG00000095739 | DES          | 0.514 | 0.000 |



|                 |            |       |       |
|-----------------|------------|-------|-------|
| ENSG00000119408 | C12orf48   | 0.514 | 0.001 |
| ENSG00000198663 | WDR62      | 0.514 | 0.034 |
| ENSG00000175376 | NR2C2      | 0.515 | 0.007 |
| ENSG00000186998 | ZEB2       | 0.515 | 0.031 |
| ENSG00000155324 | TTC27      | 0.515 | 0.042 |
| ENSG00000179820 | HPRT1      | 0.516 | 0.015 |
| ENSG00000166012 | STK38L     | 0.516 | 0.019 |
| ENSG00000256269 | AC093510.2 | 0.516 | 0.021 |
| ENSG00000153395 | CEP350     | 0.518 | 0.001 |
| ENSG00000116062 | IL10RA     | 0.518 | 0.033 |
| ENSG00000160828 | COL8A2     | 0.518 | 0.022 |
| ENSG00000050426 | HN1L       | 0.518 | 0.002 |
| ENSG00000137801 | GPRC5A     | 0.518 | 0.000 |
| ENSG00000178295 | CLEC2D     | 0.518 | 0.007 |
| ENSG00000093167 | HECTD2     | 0.519 | 0.000 |
| ENSG00000197343 | KDM2B      | 0.519 | 0.030 |
| ENSG00000155545 | CELF1      | 0.519 | 0.022 |
| ENSG00000112297 | LRRK2      | 0.520 | 0.019 |
| ENSG00000139197 | RAD54L     | 0.521 | 0.007 |
| ENSG00000198826 | FAT4       | 0.521 | 0.003 |
| ENSG00000100376 | CR1        | 0.522 | 0.002 |
| ENSG00000177853 | NAMPTL     | 0.522 | 0.028 |
| ENSG00000112739 | BMP2K      | 0.523 | 0.026 |
| ENSG00000176619 | MAN2A2     | 0.524 | 0.000 |
| ENSG00000008513 | GTF2I      | 0.524 | 0.006 |
| ENSG00000221914 | C1GALT1    | 0.524 | 0.000 |
| ENSG00000163755 | MYADM      | 0.524 | 0.000 |
| ENSG00000137804 | TRIB2      | 0.524 | 0.000 |
| ENSG00000230724 | STAT1      | 0.525 | 0.006 |
| ENSG00000047457 | SENP2      | 0.525 | 0.004 |
| ENSG00000159131 | KLHL29     | 0.526 | 0.000 |
| ENSG00000167325 | RASGRP4    | 0.526 | 0.019 |
| ENSG00000186638 | CAND1      | 0.526 | 0.000 |
| ENSG00000134121 | BZW1       | 0.526 | 0.006 |
| ENSG00000005844 | TONSL      | 0.527 | 0.008 |
| ENSG00000071127 | PALLD      | 0.528 | 0.006 |
| ENSG00000003402 | ETNK1      | 0.528 | 0.036 |
| ENSG00000165792 | INVS       | 0.528 | 0.003 |
| ENSG00000104738 | FAM118A    | 0.528 | 0.000 |
| ENSG00000144580 | PUS1       | 0.529 | 0.000 |
| ENSG00000138185 | NCAPD2     | 0.529 | 0.021 |
| ENSG00000105639 | HSPD1P1    | 0.529 | 0.007 |
| ENSG00000122512 | PRMT3      | 0.530 | 0.000 |
| ENSG00000140829 | MTR        | 0.532 | 0.001 |
| ENSG00000090060 | XPO4       | 0.532 | 0.032 |
| ENSG00000197170 | DDX11      | 0.533 | 0.000 |
| ENSG00000118855 | FGFR1      | 0.534 | 0.016 |

|                 |          |       |       |
|-----------------|----------|-------|-------|
| ENSG00000135968 | HMG20A   | 0.534 | 0.001 |
| ENSG00000143079 | GCC2     | 0.535 | 0.001 |
| ENSG00000114026 | LPCAT1   | 0.535 | 0.000 |
| ENSG00000188807 | CAPRIN1  | 0.535 | 0.000 |
| ENSG00000163918 | NCAPH    | 0.535 | 0.031 |
| ENSG00000159176 | SLC25A37 | 0.536 | 0.004 |
| ENSG00000198586 | FMR1     | 0.536 | 0.000 |
| ENSG00000205336 | TYMS     | 0.536 | 0.013 |
| ENSG00000163832 | NFKBIZ   | 0.537 | 0.000 |
| ENSG00000184863 | TPD52L1  | 0.538 | 0.039 |
| ENSG00000143375 | IPO11    | 0.538 | 0.035 |
| ENSG00000165732 | PPP1R12A | 0.538 | 0.000 |
| ENSG00000182541 | MTUS1    | 0.539 | 0.000 |
| ENSG00000092201 | WARS     | 0.539 | 0.001 |
| ENSG00000111206 | RPS6KB1  | 0.539 | 0.013 |
| ENSG00000050730 | NKTR     | 0.540 | 0.000 |
| ENSG00000205583 | MLLT6    | 0.540 | 0.009 |
| ENSG00000113810 | ZDHH8    | 0.543 | 0.035 |
| ENSG00000167775 | ABCC5    | 0.544 | 0.002 |
| ENSG00000107625 | DCLRE1B  | 0.544 | 0.005 |
| ENSG00000056097 | CCP110   | 0.544 | 0.017 |
| ENSG00000196547 | UBE2T    | 0.545 | 0.036 |
| ENSG00000144231 | TOR1AIP1 | 0.545 | 0.000 |
| ENSG00000013573 | PPIP5K2  | 0.545 | 0.020 |
| ENSG00000137267 | MLL5     | 0.545 | 0.000 |
| ENSG00000171681 | SLC10A7  | 0.546 | 0.000 |
| ENSG00000040341 | SCLY     | 0.547 | 0.038 |
| ENSG00000135919 | HBS1L    | 0.547 | 0.000 |
| ENSG00000173276 | HYAL1    | 0.548 | 0.024 |
| ENSG00000117155 | GNAI1    | 0.548 | 0.044 |
| ENSG00000135720 | PPP2R1B  | 0.548 | 0.002 |
| ENSG00000177189 | MAPK1    | 0.548 | 0.036 |
| ENSG00000102908 | NFIX     | 0.548 | 0.022 |
| ENSG00000073921 | EIF1AY   | 0.549 | 0.034 |
| ENSG00000105221 | DPH2     | 0.549 | 0.000 |
| ENSG00000132970 | ABI3BP   | 0.550 | 0.014 |
| ENSG00000082213 | PARP14   | 0.550 | 0.023 |
| ENSG00000043462 | KBTBD2   | 0.550 | 0.007 |
| ENSG00000144802 | XRCC5    | 0.550 | 0.000 |
| ENSG00000149269 | BOP1     | 0.551 | 0.045 |
| ENSG00000165124 | ASH1L    | 0.551 | 0.044 |
| ENSG00000117335 | DKC1     | 0.551 | 0.009 |
| ENSG00000119535 | NMD3     | 0.552 | 0.001 |
| ENSG00000165895 | GLS      | 0.553 | 0.001 |
| ENSG00000115364 | KIAA1530 | 0.553 | 0.019 |
| ENSG00000122008 | MFN1     | 0.554 | 0.043 |
| ENSG00000103202 | CP       | 0.555 | 0.035 |

|                 |          |       |       |
|-----------------|----------|-------|-------|
| ENSG00000100852 | MS4A7    | 0.555 | 0.011 |
| ENSG00000111530 | PTGFR    | 0.555 | 0.001 |
| ENSG00000167491 | CORO1C   | 0.555 | 0.032 |
| ENSG00000138768 | TCHP     | 0.555 | 0.032 |
| ENSG00000196696 | ANKRD17  | 0.555 | 0.050 |
| ENSG00000144852 | WEE1     | 0.555 | 0.004 |
| ENSG00000129116 | WDR1     | 0.557 | 0.004 |
| ENSG00000227018 | PDLIM5   | 0.557 | 0.002 |
| ENSG00000132768 | SLC6A9   | 0.558 | 0.037 |
| ENSG00000164116 | CLSTN3   | 0.558 | 0.015 |
| ENSG00000154760 | FAM86A   | 0.558 | 0.001 |
| ENSG00000160593 | MCM3     | 0.559 | 0.003 |
| ENSG00000071575 | KIAA0101 | 0.559 | 0.000 |
| ENSG00000130227 | PBX3     | 0.559 | 0.005 |
| ENSG00000225241 | FAM129C  | 0.559 | 0.000 |
| ENSG00000129292 | SOD2     | 0.559 | 0.014 |
| ENSG00000111737 | ATL2     | 0.559 | 0.000 |
| ENSG00000203747 | SORD     | 0.560 | 0.008 |
| ENSG00000133835 | PLXDC1   | 0.560 | 0.002 |
| ENSG00000125730 | DDX18    | 0.561 | 0.024 |
| ENSG00000204614 | SCAMP5   | 0.562 | 0.041 |
| ENSG00000112282 | RABL3    | 0.562 | 0.014 |
| ENSG00000068308 | NFATC2IP | 0.562 | 0.000 |
| ENSG00000138035 | TMPO     | 0.563 | 0.014 |
| ENSG00000111011 | XPOT     | 0.564 | 0.045 |
| ENSG00000162551 | ADAM10   | 0.564 | 0.030 |
| ENSG00000159140 | SREK1    | 0.564 | 0.001 |
| ENSG00000118894 | LCP2     | 0.565 | 0.031 |
| ENSG00000135387 | SF3B3    | 0.565 | 0.000 |
| ENSG00000103044 | MTDH     | 0.566 | 0.001 |
| ENSG00000120802 | GOLT1B   | 0.568 | 0.028 |
| ENSG00000117523 | CDCA7L   | 0.568 | 0.000 |
| ENSG00000121749 | WHSC1    | 0.568 | 0.029 |
| ENSG00000174799 | SLC43A1  | 0.569 | 0.033 |
| ENSG00000139190 | STAT3    | 0.569 | 0.006 |
| ENSG00000177426 | GNA12    | 0.569 | 0.000 |
| ENSG00000137752 | SLC38A5  | 0.570 | 0.006 |
| ENSG00000176142 | DIAPH1   | 0.570 | 0.000 |
| ENSG00000154175 | VRK2     | 0.570 | 0.000 |
| ENSG00000184163 | FOXM1    | 0.571 | 0.032 |
| ENSG00000125107 | GNPDA2   | 0.571 | 0.004 |
| ENSG00000154096 | TMEM201  | 0.572 | 0.002 |
| ENSG00000139163 | BTN3A3   | 0.572 | 0.002 |
| ENSG00000139182 | KPNB1    | 0.572 | 0.005 |
| ENSG00000163608 | LIN54    | 0.573 | 0.000 |
| ENSG00000057252 | TMEM39A  | 0.573 | 0.004 |
| ENSG00000163534 | SMC6     | 0.574 | 0.003 |

|                 |                 |       |       |
|-----------------|-----------------|-------|-------|
| ENSG00000163935 | C9orf64         | 0.574 | 0.039 |
| ENSG00000108039 | NFIA            | 0.575 | 0.000 |
| ENSG00000164045 | POLR1B          | 0.575 | 0.041 |
| ENSG00000086200 | CALU            | 0.575 | 0.013 |
| ENSG00000170485 | VAMP1           | 0.576 | 0.032 |
| ENSG00000135373 | ACSL3           | 0.576 | 0.000 |
| ENSG00000114867 | GMPS            | 0.576 | 0.001 |
| ENSG00000088833 | MORF4L2         | 0.576 | 0.000 |
| ENSG00000008294 | MIER3           | 0.576 | 0.000 |
| ENSG00000131018 | KIF16B          | 0.577 | 0.046 |
| ENSG00000139218 | RAP1GDS1        | 0.577 | 0.000 |
| ENSG00000144283 | ZZZ3            | 0.578 | 0.001 |
| ENSG00000134086 | TTF2            | 0.578 | 0.041 |
| ENSG00000154734 | FAM111A         | 0.579 | 0.000 |
| ENSG00000070367 | MTF2            | 0.579 | 0.000 |
| ENSG00000243716 | VCAM1           | 0.579 | 0.030 |
| ENSG0000010322  | EXOSC2          | 0.580 | 0.000 |
| ENSG00000151914 | USP53           | 0.580 | 0.000 |
| ENSG00000163386 | SPN             | 0.580 | 0.043 |
| ENSG00000114745 | INPP5D          | 0.580 | 0.002 |
| ENSG00000114650 | RP11-368J21.2.1 | 0.581 | 0.008 |
| ENSG00000155229 | BTAF1           | 0.581 | 0.000 |
| ENSG00000107968 | EVL             | 0.581 | 0.001 |
| ENSG00000168209 | NPM1            | 0.581 | 0.003 |
| ENSG00000163904 | PEA15           | 0.581 | 0.025 |
| ENSG00000119397 | HSD17B12        | 0.582 | 0.034 |
| ENSG00000198780 | NUSAP1          | 0.582 | 0.028 |
| ENSG00000172890 | BDP1            | 0.582 | 0.000 |
| ENSG00000178921 | HPSE            | 0.582 | 0.001 |
| ENSG00000217128 | ATP2A2          | 0.582 | 0.000 |
| ENSG00000101557 | ZNF518A         | 0.583 | 0.020 |
| ENSG00000150093 | C12orf29        | 0.584 | 0.003 |
| ENSG00000124508 | ATAD3B          | 0.584 | 0.000 |
| ENSG00000092470 | RQCD1           | 0.584 | 0.002 |
| ENSG00000076003 | ARIH2           | 0.584 | 0.000 |
| ENSG00000119777 | TACC3           | 0.585 | 0.000 |
| ENSG00000136653 | SOAT1           | 0.585 | 0.000 |
| ENSG00000139278 | AKAP12          | 0.586 | 0.001 |
| ENSG00000259131 | HMBS            | 0.586 | 0.003 |
| ENSG00000138434 | STAG3L2         | 0.587 | 0.000 |
| ENSG00000145675 | ASRGL1          | 0.587 | 0.000 |
| ENSG00000089335 | ERLIN1          | 0.588 | 0.001 |
| ENSG00000173706 | C4orf43         | 0.588 | 0.027 |
| ENSG00000166250 | PIK3R1          | 0.589 | 0.010 |
| ENSG00000171865 | MICAL2          | 0.590 | 0.038 |
| ENSG00000174720 | USP14           | 0.590 | 0.006 |
| ENSG00000146535 | CEP164          | 0.590 | 0.021 |

|                 |                |       |       |
|-----------------|----------------|-------|-------|
| ENSG00000162174 | ATG4C          | 0.591 | 0.004 |
| ENSG00000237289 | MLLT4          | 0.591 | 0.000 |
| ENSG00000080603 | RBBP8          | 0.591 | 0.000 |
| ENSG00000087266 | ANKRD11        | 0.592 | 0.017 |
| ENSG00000119402 | KHSRP          | 0.592 | 0.001 |
| ENSG00000119318 | C4orf46        | 0.592 | 0.007 |
| ENSG00000113328 | GPAM           | 0.593 | 0.012 |
| ENSG00000067646 | RP11-304M2.2.1 | 0.593 | 0.007 |
| ENSG00000134283 | MYO19          | 0.593 | 0.013 |
| ENSG00000153914 | GPCPD1         | 0.594 | 0.000 |
| ENSG00000142623 | STK36          | 0.594 | 0.010 |
| ENSG00000152527 | CD8A           | 0.594 | 0.002 |
| ENSG00000118655 | ITGB1          | 0.594 | 0.045 |
| ENSG00000137845 | TMEM62         | 0.595 | 0.002 |
| ENSG00000100897 | G3BP1          | 0.595 | 0.028 |
| ENSG00000198794 | TM9SF3         | 0.595 | 0.034 |
| ENSG00000133884 | KLHDC4         | 0.595 | 0.010 |
| ENSG00000111445 | TMEM165        | 0.596 | 0.007 |
| ENSG00000102854 | MACF1          | 0.596 | 0.000 |
| ENSG00000028116 | MAP4           | 0.597 | 0.000 |
| ENSG00000118976 | SYNCRIP        | 0.597 | 0.012 |
| ENSG00000008311 | STAU2          | 0.597 | 0.025 |
| ENSG00000146247 | VARS           | 0.598 | 0.000 |
| ENSG00000099904 | IFNAR1         | 0.598 | 0.022 |
| ENSG00000170275 | SRRM1          | 0.598 | 0.000 |
| ENSG00000135624 | IARS           | 0.598 | 0.006 |
| ENSG00000165055 | LGALS8         | 0.598 | 0.000 |
| ENSG00000156738 | ADM            | 0.599 | 0.000 |
| ENSG00000160856 | PAXIP1         | 0.599 | 0.033 |
| ENSG00000138593 | EIF5           | 0.599 | 0.000 |
| ENSG00000142949 | UEVLD          | 0.599 | 0.001 |
| ENSG00000149743 | U2SURP         | 0.599 | 0.000 |
| ENSG00000144848 | HSD17B4        | 0.600 | 0.004 |
| ENSG00000043514 | SEC24D         | 0.600 | 0.000 |
| ENSG00000145781 | STXBP5         | 0.601 | 0.049 |
| ENSG00000095787 | HPS3           | 0.601 | 0.001 |
| ENSG00000184661 | SENP6          | 0.602 | 0.000 |
| ENSG00000184557 | GPATCH4        | 0.602 | 0.001 |
| ENSG00000117481 | PLAA           | 0.602 | 0.013 |
| ENSG00000076685 | TNFAIP3        | 0.603 | 0.029 |
| ENSG00000121067 | KDM5D          | 0.603 | 0.030 |
| ENSG00000173083 | LAX1           | 0.603 | 0.000 |
| ENSG00000149187 | FMNL2          | 0.604 | 0.000 |
| ENSG00000100226 | SGMS1          | 0.604 | 0.001 |
| ENSG00000149182 | CCNT2          | 0.604 | 0.000 |
| ENSG00000164080 | SPARC          | 0.605 | 0.000 |
| ENSG00000143753 | ANKRD49        | 0.605 | 0.000 |

|                 |            |       |       |
|-----------------|------------|-------|-------|
| ENSG00000117090 | SMG7       | 0.606 | 0.000 |
| ENSG00000111581 | SNX19      | 0.606 | 0.008 |
| ENSG00000214135 | DNAJA4     | 0.606 | 0.001 |
| ENSG00000052126 | ZAP70      | 0.608 | 0.000 |
| ENSG00000135164 | FERMT1     | 0.608 | 0.002 |
| ENSG00000245164 | VPS8       | 0.609 | 0.034 |
| ENSG00000150961 | PAK1       | 0.610 | 0.000 |
| ENSG00000204256 | GTF2H2     | 0.610 | 0.012 |
| ENSG00000163328 | SP4        | 0.610 | 0.017 |
| ENSG00000109920 | DDIT4      | 0.610 | 0.003 |
| ENSG00000170266 | PMS2       | 0.611 | 0.000 |
| ENSG00000138698 | MYO1G      | 0.611 | 0.000 |
| ENSG00000184162 | SSFA2      | 0.611 | 0.031 |
| ENSG00000112699 | EI24       | 0.611 | 0.000 |
| ENSG00000091651 | MSTO1      | 0.612 | 0.001 |
| ENSG00000013588 | ZNF567     | 0.612 | 0.025 |
| ENSG00000133641 | HLA-DQB1   | 0.612 | 0.018 |
| ENSG00000174827 | CLK4       | 0.612 | 0.003 |
| ENSG00000108443 | ESYT1      | 0.612 | 0.005 |
| ENSG00000127955 | TRPM7      | 0.613 | 0.012 |
| ENSG00000187147 | ITGA6      | 0.613 | 0.004 |
| ENSG00000211455 | CDCA7      | 0.614 | 0.001 |
| ENSG00000157404 | ATAD3A     | 0.614 | 0.000 |
| ENSG00000081059 | DNM1L      | 0.614 | 0.004 |
| ENSG00000180771 | PISD       | 0.614 | 0.000 |
| ENSG00000148187 | CARD8      | 0.615 | 0.005 |
| ENSG00000149636 | FBXW2      | 0.615 | 0.000 |
| ENSG00000100664 | PLCB2      | 0.615 | 0.044 |
| ENSG00000133048 | CSNK1G3    | 0.615 | 0.006 |
| ENSG00000134255 | AC138035.1 | 0.616 | 0.006 |
| ENSG00000082458 | DFFA       | 0.617 | 0.016 |
| ENSG00000205268 | SEC22C     | 0.618 | 0.041 |
| ENSG00000168958 | PRC1       | 0.618 | 0.020 |
| ENSG00000099194 | CCDC86     | 0.618 | 0.000 |
| ENSG00000198692 | ZNF92      | 0.618 | 0.000 |
| ENSG00000089177 | CGGBP1     | 0.618 | 0.026 |
| ENSG00000083099 | DHX9       | 0.618 | 0.000 |
| ENSG00000078668 | NOP58      | 0.619 | 0.014 |
| ENSG00000189042 | TFDP1      | 0.620 | 0.005 |
| ENSG00000115705 | DDX50      | 0.620 | 0.041 |
| ENSG00000114378 | PPHLN1     | 0.620 | 0.000 |
| ENSG00000110274 | ABCB8      | 0.620 | 0.000 |
| ENSG00000198951 | PRRC2C     | 0.620 | 0.003 |
| ENSG00000101773 | SCAF11     | 0.621 | 0.006 |
| ENSG00000139734 | SWAP70     | 0.621 | 0.004 |
| ENSG00000189091 | DEPDC1     | 0.621 | 0.019 |
| ENSG00000112339 | AEBP2      | 0.622 | 0.001 |

|                 |         |       |       |
|-----------------|---------|-------|-------|
| ENSG00000006194 | IVD     | 0.622 | 0.048 |
| ENSG00000125630 | POLR3B  | 0.622 | 0.038 |
| ENSG00000154814 | CBWD3   | 0.623 | 0.048 |
| ENSG00000139546 | LCK     | 0.623 | 0.026 |
| ENSG00000145736 | EIF1AD  | 0.623 | 0.025 |
| ENSG00000142910 | VEZT    | 0.623 | 0.000 |
| ENSG00000138081 | POLR3E  | 0.623 | 0.032 |
| ENSG00000153064 | PAPOLA  | 0.624 | 0.009 |
| ENSG00000110696 | SET     | 0.624 | 0.021 |
| ENSG00000183010 | CNTRL   | 0.624 | 0.003 |
| ENSG00000169032 | HNRNPA3 | 0.625 | 0.000 |
| ENSG00000136689 | PPIG    | 0.625 | 0.000 |
| ENSG00000138964 | SDCCAG3 | 0.626 | 0.008 |
| ENSG00000249669 | OGG1    | 0.626 | 0.027 |
| ENSG00000176014 | MARS    | 0.627 | 0.000 |
| ENSG00000100813 | AVL9    | 0.627 | 0.004 |
| ENSG00000149591 | GIGYF2  | 0.627 | 0.013 |
| ENSG00000166483 | NBPF3   | 0.627 | 0.004 |
| ENSG00000160223 | NQO1    | 0.628 | 0.006 |
| ENSG00000165862 | TAGLN   | 0.628 | 0.000 |
| ENSG00000197930 | ENTPD1  | 0.629 | 0.050 |
| ENSG00000149547 | CHD1    | 0.629 | 0.004 |
| ENSG00000122515 | STAG3L3 | 0.629 | 0.001 |
| ENSG00000167965 | TBC1D15 | 0.629 | 0.000 |
| ENSG00000114416 | DEGS1   | 0.629 | 0.018 |
| ENSG00000157800 | CCNG2   | 0.629 | 0.010 |
| ENSG00000131373 | SNRNP40 | 0.629 | 0.026 |
| ENSG00000151116 | CKAP5   | 0.630 | 0.000 |
| ENSG00000008517 | PARVG   | 0.630 | 0.007 |
| ENSG00000181704 | NASP    | 0.630 | 0.006 |
| ENSG00000169554 | SLC12A8 | 0.630 | 0.004 |
| ENSG00000068724 | MAGI3   | 0.630 | 0.017 |
| ENSG00000204361 | HNRPDL  | 0.630 | 0.006 |
| ENSG00000116984 | METTL2B | 0.630 | 0.022 |
| ENSG00000116337 | IRF1    | 0.630 | 0.001 |
| ENSG00000123219 | CEACAM1 | 0.631 | 0.002 |
| ENSG00000131016 | TP53BP2 | 0.632 | 0.046 |
| ENSG00000138750 | SEC63   | 0.634 | 0.025 |
| ENSG00000008441 | GPR114  | 0.634 | 0.025 |
| ENSG00000110324 | CCAR1   | 0.634 | 0.030 |
| ENSG00000134108 | CAP1    | 0.634 | 0.004 |
| ENSG00000148688 | UBE2W   | 0.635 | 0.029 |
| ENSG00000119969 | STAG3L1 | 0.635 | 0.046 |
| ENSG00000104731 | NEK6    | 0.636 | 0.000 |
| ENSG00000100714 | MAPK9   | 0.636 | 0.010 |
| ENSG00000140511 | SKIV2L2 | 0.636 | 0.017 |
| ENSG00000109756 | RSPH3   | 0.636 | 0.030 |

|                 |                 |       |       |
|-----------------|-----------------|-------|-------|
| ENSG00000104472 | ARL8B           | 0.637 | 0.010 |
| ENSG00000116191 | BTN2A2          | 0.637 | 0.032 |
| ENSG00000013810 | GABARAPL1       | 0.638 | 0.000 |
| ENSG00000104972 | CHRA1           | 0.639 | 0.042 |
| ENSG00000204392 | MYO1E           | 0.639 | 0.014 |
| ENSG00000144840 | TRIT1           | 0.639 | 0.003 |
| ENSG00000130176 | FAM82A2         | 0.639 | 0.030 |
| ENSG00000128989 | SRP72           | 0.639 | 0.000 |
| ENSG00000229404 | SRM             | 0.641 | 0.021 |
| ENSG00000116698 | AMPD2           | 0.642 | 0.000 |
| ENSG00000106484 | SH3BP2          | 0.642 | 0.016 |
| ENSG00000170312 | RBBP7           | 0.642 | 0.017 |
| ENSG00000140382 | TUBB6           | 0.642 | 0.000 |
| ENSG00000103381 | ZMIZ2           | 0.642 | 0.000 |
| ENSG00000132341 | MATR3           | 0.643 | 0.001 |
| ENSG00000000938 | XPO7            | 0.643 | 0.019 |
| ENSG00000185215 | KIAA1598        | 0.643 | 0.022 |
| ENSG00000150667 | SLMAP           | 0.643 | 0.006 |
| ENSG00000094804 | THBS1           | 0.644 | 0.010 |
| ENSG00000125772 | ANKRD28         | 0.644 | 0.046 |
| ENSG00000105983 | RASSF5          | 0.644 | 0.001 |
| ENSG00000122482 | ELAC2           | 0.644 | 0.020 |
| ENSG00000166833 | C3orf17         | 0.645 | 0.020 |
| ENSG00000175787 | ARHGAP5         | 0.646 | 0.000 |
| ENSG00000102054 | CFLAR           | 0.646 | 0.000 |
| ENSG00000066136 | TRIO            | 0.646 | 0.045 |
| ENSG00000056586 | RP11-1319K7.1.1 | 0.646 | 0.048 |
| ENSG00000164062 | EPAS1           | 0.646 | 0.000 |
| ENSG00000164930 | ZNF300          | 0.646 | 0.014 |
| ENSG00000170852 | SART3           | 0.647 | 0.000 |
| ENSG00000132676 | C5orf22         | 0.647 | 0.000 |
| ENSG00000168386 | ASPM            | 0.648 | 0.013 |
| ENSG00000111247 | ARHGEF19        | 0.649 | 0.029 |
| ENSG00000160049 | FUT8            | 0.649 | 0.037 |
| ENSG00000108292 | HNRNP1          | 0.649 | 0.000 |
| ENSG00000050748 | TLK1            | 0.649 | 0.000 |
| ENSG00000038382 | RAN             | 0.649 | 0.021 |
| ENSG00000168876 | C3              | 0.649 | 0.042 |
| ENSG00000171777 | CPPED1          | 0.649 | 0.000 |
| ENSG00000116977 | NR2C2AP         | 0.650 | 0.020 |
| ENSG00000156802 | DLG3            | 0.650 | 0.042 |
| ENSG00000133706 | FNIP1           | 0.650 | 0.002 |
| ENSG00000085999 | MAP3K7          | 0.650 | 0.003 |
| ENSG00000162924 | GATAD2A         | 0.650 | 0.000 |
| ENSG00000070756 | TRAF3IP3        | 0.650 | 0.005 |
| ENSG00000106638 | MCFD2           | 0.650 | 0.000 |
| ENSG00000111726 | IDH3A           | 0.651 | 0.000 |



|                 |          |       |       |
|-----------------|----------|-------|-------|
| ENSG00000143870 | SLC37A3  | 0.651 | 0.000 |
| ENSG00000174579 | SLC25A46 | 0.651 | 0.000 |
| ENSG00000214837 | CUL2     | 0.651 | 0.002 |
| ENSG00000101311 | WDR48    | 0.651 | 0.027 |
| ENSG00000170727 | PWP1     | 0.652 | 0.000 |
| ENSG00000119707 | RPS6KA4  | 0.652 | 0.047 |
| ENSG00000111679 | ZMYM1    | 0.652 | 0.003 |
| ENSG00000119927 | AIM1     | 0.652 | 0.024 |
| ENSG00000140400 | RCOR3    | 0.653 | 0.024 |
| ENSG00000174353 | ATXN2L   | 0.654 | 0.000 |
| ENSG00000145390 | LYRM2    | 0.654 | 0.007 |
| ENSG00000092148 | ICOSLG   | 0.654 | 0.018 |
| ENSG00000114850 | YME1L1   | 0.654 | 0.001 |
| ENSG00000119335 | SUN2     | 0.654 | 0.011 |
| ENSG00000010292 | SFMBT1   | 0.654 | 0.006 |
| ENSG00000110619 | ITGB3BP  | 0.654 | 0.002 |
| ENSG00000132640 | COMMD10  | 0.654 | 0.042 |
| ENSG00000119509 | CAMK2D   | 0.655 | 0.000 |
| ENSG00000086102 | TCERG1   | 0.655 | 0.026 |
| ENSG00000149311 | CCDC25   | 0.655 | 0.008 |
| ENSG00000163430 | SNX13    | 0.655 | 0.008 |
| ENSG00000197299 | FZD6     | 0.655 | 0.000 |
| ENSG00000175084 | UBR3     | 0.656 | 0.000 |
| ENSG00000142794 | MARCH7   | 0.656 | 0.023 |
| ENSG00000196923 | TMED2    | 0.656 | 0.000 |
| ENSG00000149554 | FAM134B  | 0.656 | 0.005 |
| ENSG00000163945 | NSUN4    | 0.656 | 0.046 |
| ENSG00000139350 | NME4     | 0.657 | 0.000 |
| ENSG00000067048 | PA2G4    | 0.657 | 0.001 |
| ENSG00000086475 | MTHFD1   | 0.657 | 0.018 |
| ENSG00000144354 | TP53     | 0.657 | 0.000 |
| ENSG00000116560 | B4GALT2  | 0.657 | 0.000 |
| ENSG00000139579 | VPRBP    | 0.658 | 0.043 |
| ENSG00000198176 | MON1B    | 0.658 | 0.010 |
| ENSG00000066279 | EIF4G1   | 0.658 | 0.000 |
| ENSG00000011465 | THY1     | 0.659 | 0.038 |
| ENSG00000110090 | SDHAP2   | 0.659 | 0.005 |
| ENSG00000197822 | DSN1     | 0.660 | 0.000 |
| ENSG00000151690 | PGP      | 0.660 | 0.032 |
| ENSG00000171793 | SND1     | 0.660 | 0.000 |
| ENSG00000120708 | MAP2K1   | 0.661 | 0.048 |
| ENSG00000099282 | KIAA0182 | 0.662 | 0.000 |
| ENSG00000161048 | NBEAL2   | 0.663 | 0.000 |
| ENSG00000153563 | PKP4     | 0.663 | 0.038 |
| ENSG00000120519 | CUL4A    | 0.663 | 0.000 |
| ENSG00000130363 | RNF2     | 0.663 | 0.005 |
| ENSG00000164733 | NFKB1    | 0.664 | 0.044 |

|                 |                     |       |       |
|-----------------|---------------------|-------|-------|
| ENSG00000198642 | AC024560.3.1        | 0.664 | 0.025 |
| ENSG00000117625 | SRSF10              | 0.665 | 0.000 |
| ENSG00000141140 | RBM25               | 0.665 | 0.009 |
| ENSG00000188938 | FUS                 | 0.665 | 0.000 |
| ENSG00000179583 | CASD1               | 0.665 | 0.001 |
| ENSG00000111540 | OBFC2B              | 0.665 | 0.002 |
| ENSG00000060642 | ODF2                | 0.666 | 0.039 |
| ENSG00000241978 | TNFAIP2             | 0.666 | 0.036 |
| ENSG00000137825 | ZNF644              | 0.666 | 0.001 |
| ENSG00000028203 | ARMCX5              | 0.668 | 0.034 |
| ENSG00000055044 | CARD16,CARD17,CASP1 | 0.668 | 0.018 |
| ENSG00000162302 | SEH1L               | 0.668 | 0.036 |
| ENSG00000113319 | FYN                 | 0.668 | 0.010 |
| ENSG00000260528 | KIAA0895L           | 0.668 | 0.034 |
| ENSG00000039123 | PPWD1               | 0.668 | 0.005 |
| ENSG00000068366 | RCN1                | 0.669 | 0.002 |
| ENSG00000258366 | THEM4               | 0.669 | 0.011 |
| ENSG00000213213 | MEF2D               | 0.669 | 0.003 |
| ENSG00000023445 | LPAR1               | 0.669 | 0.000 |
| ENSG00000178462 | LMNB2               | 0.669 | 0.000 |
| ENSG00000145860 | BTBD3               | 0.670 | 0.023 |

**Supplementary Table 2:** Genes with significantly decreased (>1.5 fold decrease in expression, q value = false discovery rate [FDR] <0.05) expression by RNA sequencing according to Cuffdiff bioinformatic analysis (see Supplementary Methods)

| Gene_id         | Gene       | Fold change       | q_value |
|-----------------|------------|-------------------|---------|
| ENSG00000133226 | AMIGO3     | undetected before | 0.000   |
| ENSG00000127314 | LGSN       | 17.620            | 0.000   |
| ENSG00000130396 | AC027323.1 | 4.763             | 0.013   |
| ENSG00000139154 | PDZK1      | 3.812             | 0.001   |
| ENSG00000100297 | GSTA1      | 3.368             | 0.007   |
| ENSG00000111799 | MSLN       | 3.278             | 0.001   |
| ENSG00000197785 | PNLIPRP2   | 2.509             | 0.004   |
| ENSG00000157954 | KIAA1984   | 1.706             | 0.017   |
| ENSG00000115419 | SLC37A2    | 1.665             | 0.002   |
| ENSG00000116406 | BAMBI      | 1.634             | 0.000   |
| ENSG00000166928 | PIGZ       | 1.607             | 0.008   |
| ENSG00000163110 | FAM132A    | 1.589             | 0.034   |

**Supplementary Table 3:** Genes with significantly increased (>1.5 fold increase in expression, q value = false discovery rate [FDR] <0.05) expression by RNA sequencing according to Cuffdiff bioinformatic analysis (see Supplementary Methods)

**MEDICAL HISTORY**

Please check conditions **YOU** have now, or have had in the past or list below.

- |                                             |                                        |                                              |                                                        |
|---------------------------------------------|----------------------------------------|----------------------------------------------|--------------------------------------------------------|
| <input type="checkbox"/> Alcohol/drug Abuse | <input type="checkbox"/> Cataracts     | <input type="checkbox"/> Herpes              | <input type="checkbox"/> Rheumatic Fever               |
| <input type="checkbox"/> Anemia             | <input type="checkbox"/> Depression    | <input type="checkbox"/> High Blood Pressure | <input type="checkbox"/> Stroke                        |
| <input type="checkbox"/> Anxiety            | <input type="checkbox"/> Diabetes      | <input type="checkbox"/> High Cholesterol    | <input type="checkbox"/> Thyroid Problem               |
| <input type="checkbox"/> Arthritis          | <input type="checkbox"/> Emphysema     | <input type="checkbox"/> HIV/AIDS            | <input type="checkbox"/> Tuberculosis                  |
| <input type="checkbox"/> Asthma             | <input type="checkbox"/> Epilepsy      | <input type="checkbox"/> Kidney Disease      | <input type="checkbox"/> Sexually Transmitted Diseases |
| <input type="checkbox"/> Bleeding Disorder  | <input type="checkbox"/> Glaucoma      | <input type="checkbox"/> Liver Disease       |                                                        |
| <input type="checkbox"/> Breast Lump        | <input type="checkbox"/> Heart Disease | <input type="checkbox"/> Migraine Headaches  |                                                        |
| <input type="checkbox"/> Cancer: _____      | <input type="checkbox"/> Hepatitis     | <input type="checkbox"/> Prostate Problem    |                                                        |

Other (please list): \_\_\_\_\_

**SURGERIES**

Please check or list the surgeries **YOU** have had.

- |                                              |                                             |                                         |              |
|----------------------------------------------|---------------------------------------------|-----------------------------------------|--------------|
| <input type="checkbox"/> Appendectomy        | <input type="checkbox"/> Heart Bypass/Stent | <input type="checkbox"/> Hysterectomy   | Other: _____ |
| <input type="checkbox"/> Gallbladder Removed | <input type="checkbox"/> Tonsillectomy      | <input type="checkbox"/> Tubal Ligation | _____        |

**HOSPITALIZATIONS** List all of your hospital stays for illness or surgery beginning with the most recent.

| Date | Reason | Hospital | Physician |
|------|--------|----------|-----------|
|      |        |          |           |

**LIFESTYLE CHOICES**

- Smoking Status** Type:  Never  Currently  Quit: YEAR \_\_\_\_\_
- Cigarettes (Packs/day \_\_\_\_\_)  Cigars  Pipes  Second-hand Smoke
- Smokeless Tobacco**  Never  Currently  Snuff  Chew  Quit: YEAR \_\_\_\_\_

- Alcohol Use** Type:  Liquor  Wine  Beer
- 0 drinks/week  1-6 /week  7-14 /week  Over 14/week

On any single occasion during the past 3 months, have you had more than 5 drinks containing alcohol?  Yes  No

- Weight** Now \_\_\_\_\_ 1 year ago \_\_\_\_\_ Desired \_\_\_\_\_
- Caffeine** Drinks per day \_\_\_\_\_ Types:  Cola  Coffee  Tea
- Special diet?**  Vegetarian  Vegan  Other: \_\_\_\_\_
- Exercise** Type: \_\_\_\_\_ Frequency per week \_\_\_\_\_ Duration: \_\_\_\_\_

| <b>Donor Health Information Sheet</b>                                                                    |     |    |
|----------------------------------------------------------------------------------------------------------|-----|----|
| Chronic diseases:                                                                                        |     |    |
|                                                                                                          | YES | NO |
| Antibiotics in past 6 months:                                                                            |     |    |
| If yes, when: _____                                                                                      |     |    |
| Have you been exposed to HIV or viral hepatitis at any time?                                             |     |    |
| Have you ever had sex for drugs or money?                                                                |     |    |
| Are you a man who has had sex with men?                                                                  |     |    |
| Have you had more than one sexual partner in the last 12 months?                                         |     |    |
| Have you ever been incarcerated?                                                                         |     |    |
| Have you ever used intravenous drugs or intranasal cocaine?                                              |     |    |
| Did you have a tattoo or body piercing within 12 months?                                                 |     |    |
| Have you traveled to areas of the world with increased risk of traveler's diarrhea in the past 3 months? |     |    |
| Are you currently ill (flu symptoms, fevers, runny nose, etc.)?                                          |     |    |

|                                                                                                                                                                                                           |  |  |
|-----------------------------------------------------------------------------------------------------------------------------------------------------------------------------------------------------------|--|--|
| Do you have a history of irritable bowel syndrome, or any of the associated symptoms (frequent abdominal cramps, excessive gas, bloating, abdominal distension, fecal urgency, diarrhea or constipation)? |  |  |
| Do you have a history of inflammatory bowel disease such as Crohn's disease, ulcerative colitis, lymphocytic colitis?                                                                                     |  |  |
| Do you have chronic diarrhea?                                                                                                                                                                             |  |  |
| Do you have chronic constipation or use laxatives regularly?                                                                                                                                              |  |  |
| Do you have a history of gastrointestinal malignancy (cancer) or known colon polyposis?                                                                                                                   |  |  |
| Have you ever had abdominal surgery (for example: gastric bypass, intestinal resection, appendectomy, cholecystectomy, etc.)                                                                              |  |  |
| Do you use probiotics or any other over the counter aids for specific purposes of regulating digestion?                                                                                                   |  |  |

**Supplementary Table 4:** Donor Health Information Sheet

|                                                                                        |
|----------------------------------------------------------------------------------------|
| <b>Stool testing</b>                                                                   |
| Clostridium difficile toxin A and B by PCR; if unavailable, then toxins A and B by EIA |
| Routine bacterial culture for enteric pathogens                                        |
| Fecal Giardia antigen                                                                  |
| Fecal Cryptosporidium antigen                                                          |
| Ova and parasites                                                                      |
| <b>Serologic testing</b>                                                               |
| HIV type 1 and 2                                                                       |
| Hepatitis A virus (HAV) immunoglobulin (Ig) M                                          |
| Hepatitis B virus (HBV) (surface antigen/antibody; core antibody)                      |
| Hepatitis C virus (HCV) antibody                                                       |
| Syphilis serology (Trep-sure ELISA; RPR done if treponemal test is positive)           |

**Supplementary Table 5:** Donor Screening Test

## SUPPLEMENTARY FIGURES

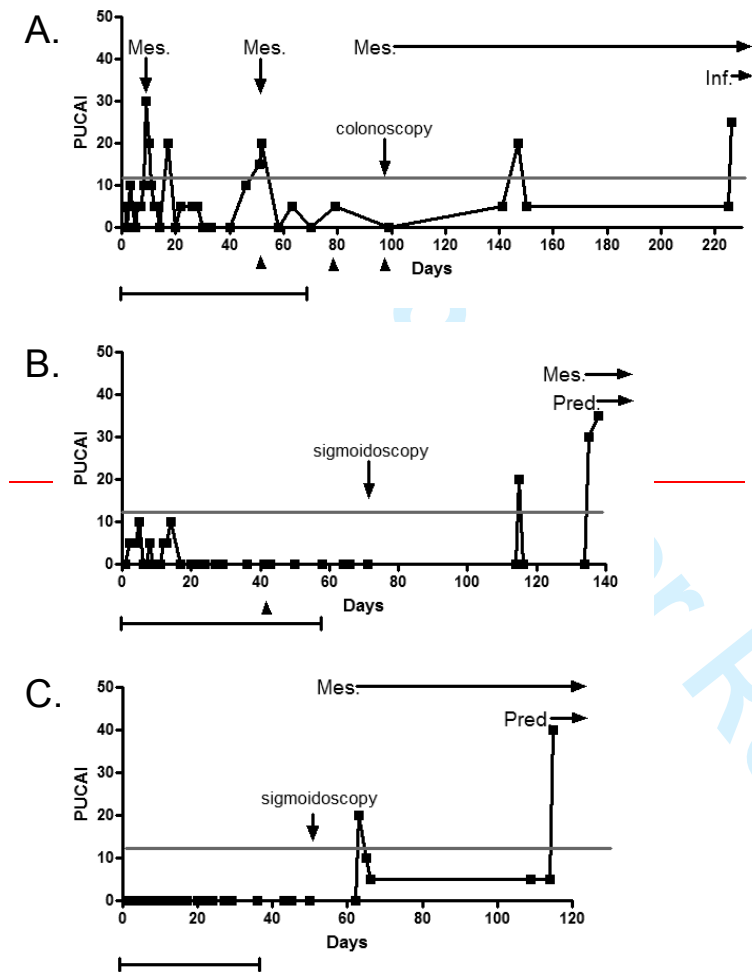

**Supplementary Figure 1. Clinical Disease Activity during the Trial.** Patient 1 (A.) received 30 rounds of FMT and experienced the longest clinical remission (pediatric ulcerative colitis activity index [PUCAI]  $\leq 10$ ; grey line). Patient 2 (B.; 25 treatments) and 3 (C.; 22 treatments) were in remission while receiving the FMT course (— below the x axes designates the time of active FMT therapy). All patients remained in remission following FMT for more than 11 weeks.

but eventually experienced a relapse requiring immunotherapy. The length of the immunotherapy free period correlated with the number of treatments received. Oral and/or rectal mesalamine (Mes.) was allowed during the trial, depending on clinical disease activity. Additional ("rescue") enemas (▲) were allowed during the first 12 weeks of the trial (i.e. during the weaning course of FMTs). Inf.: infliximab; Pred.: prednisone.

For Peer Review

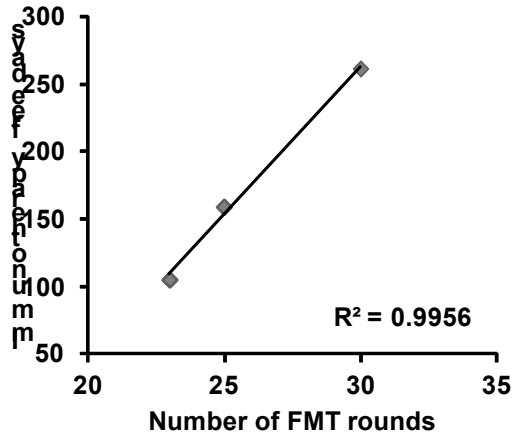

**Supplementary Figure 2. Correlation between Number of FMTs and the Immunotherapy Free Period.** There was a significant ( $r=0.998$ , two tailed  $p=0.04$ ) correlation between the number of FMT rounds received, and the length of the immunotherapy free period (in days) in the 3 patients studied.

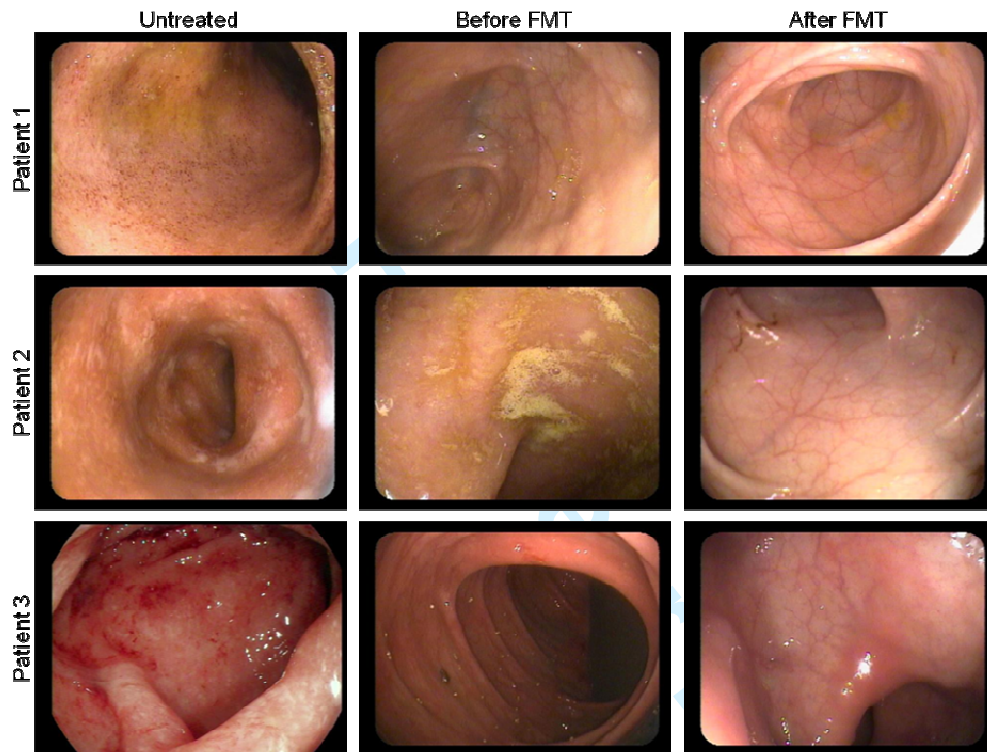

**Supplementary Figure 43.** Endoscopic images of the colonic mucosa at diagnosis (untreated), prior to FMT therapy and 2 weeks following last FMT in the patients. Patient 1 had Mayo 2 level mucosal pancolitis at diagnosis that turned into grossly normal (Mayo 0) picture with infliximab therapy and remained normal following the FMT series. These numbers for patient 2 were: Mayo 2, 1, and 0 at diagnosis, before, and following the FMTs, respectively. Patient 3 had severe (Mayo 3) pancolitis at diagnosis, enrolled in remission on steroids into the trial, then remained in gross mucosal remission (Mayo 0) following the FMTs.



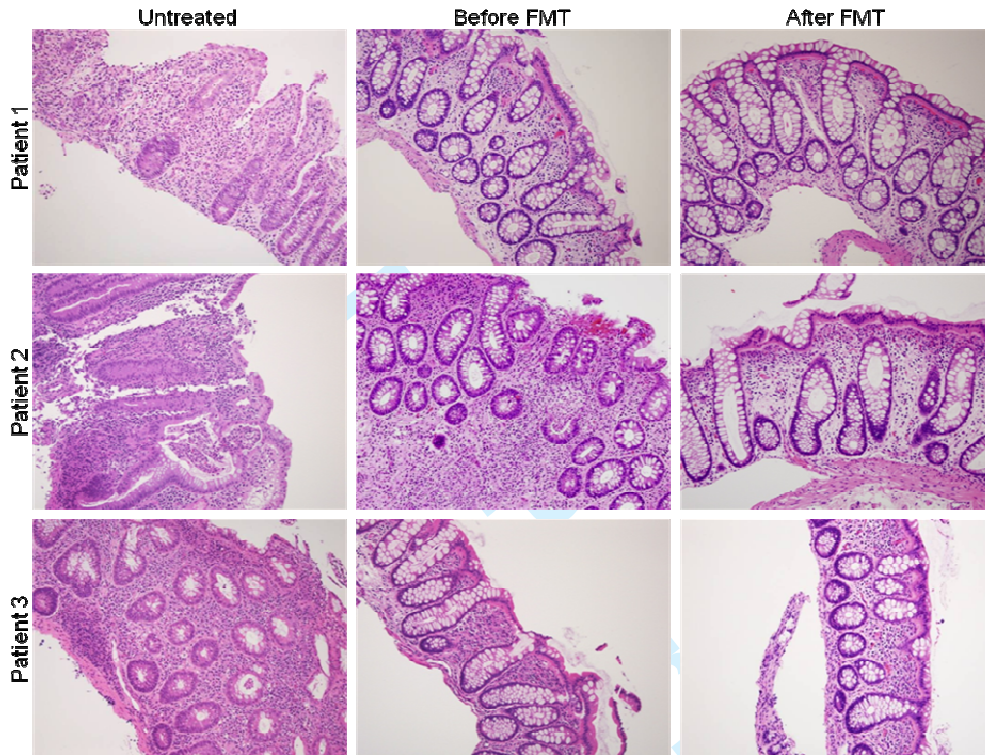

**Supplementary Figure 24.** Histologic (hematoxylin and eosin) images of the colonic mucosa at diagnosis (untreated), prior to FMT therapy and 2 weeks following last FMT in the patients. The histologic severity of inflammation largely mirrored the gross endoscopic findings (see Supplementary Figure 1) in the rectosigmoid colon. All three patients had normal mucosal architecture following the FMT series. Magnification 200x

Formatted: Line spacing: Double

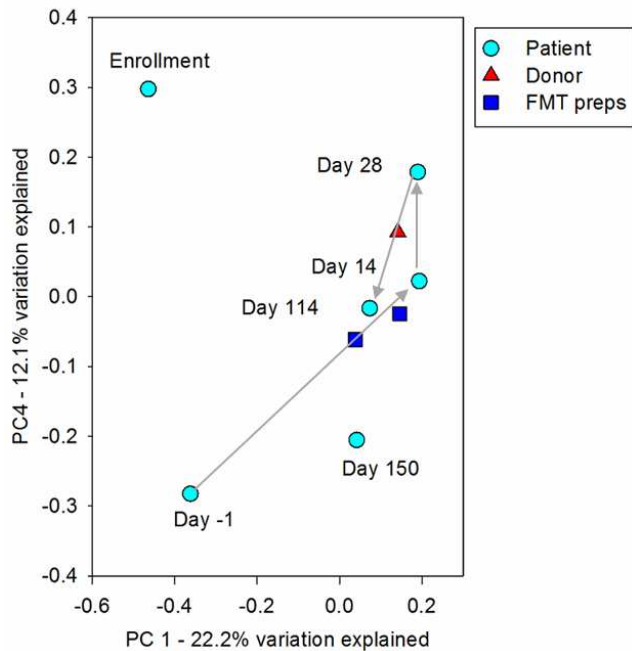

**Supplementary Figure 5. Temporal Microbiome Shifts in Patient 1.** Principle coordinates analysis of unweighted Unifrac distances between patient 1 and the donor (stool and fecal preparations) showed that the recipient microbiomes became similar to that of the donor by 14, 28, and even 114 (2 weeks after last FMT received) days into the study. By day 150, the patient microbiome started to shift back to that before the start of the trial (Day-1). Therefore, the FMT series appeared to induce a transient engraftment of the donor microbiome in the recipient.

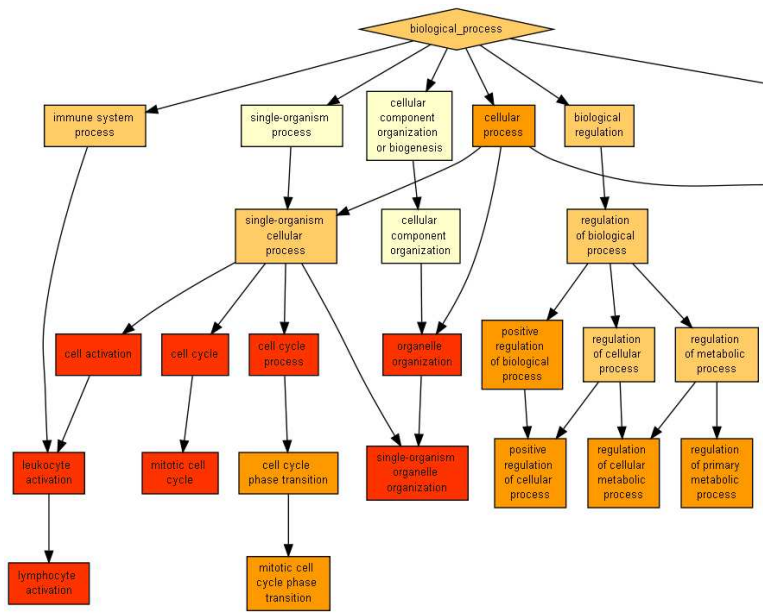

Review

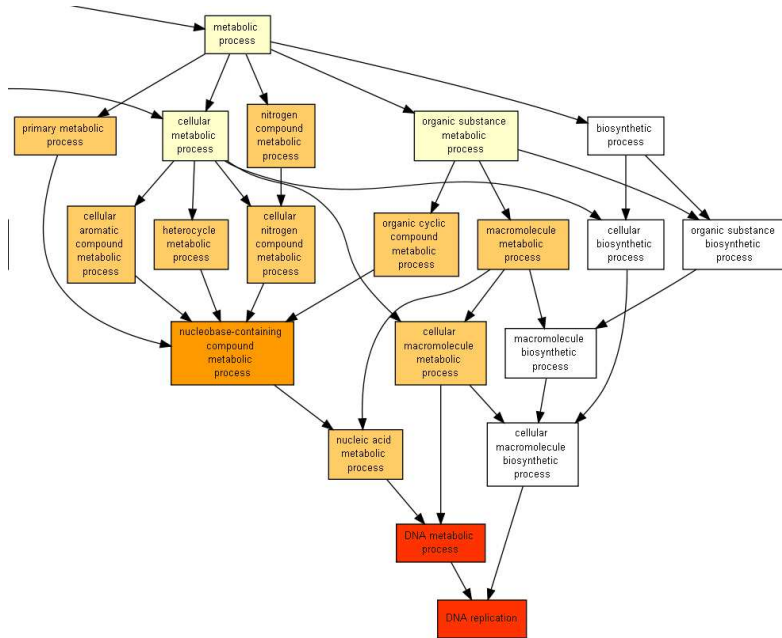

**Supplementary Figure 36. Enrichment of genes in relationship to biological processes** in the down-regulated transcripts upon the series of FMTs in our 3 UC patients (>1.5 fold suppression; FDR<0.05) by Gene Ontology enRiChment anaLysis and visualiZation tool (Gorilla: <http://cbl-gorilla.cs.technion.ac.il/>). The down-regulated transcripts were compared to a control set without expression change (FDR>0.97) upon the FMTs in the rectosigmoid mucosa. light yellow:  $p = 10^{-3}$ - $10^{-5}$ ; dark yellow:  $p = 10^{-5}$ - $10^{-7}$ ; orange:  $p = 10^{-7}$ - $10^{-9}$ ; red:  $p < 10^{-9}$

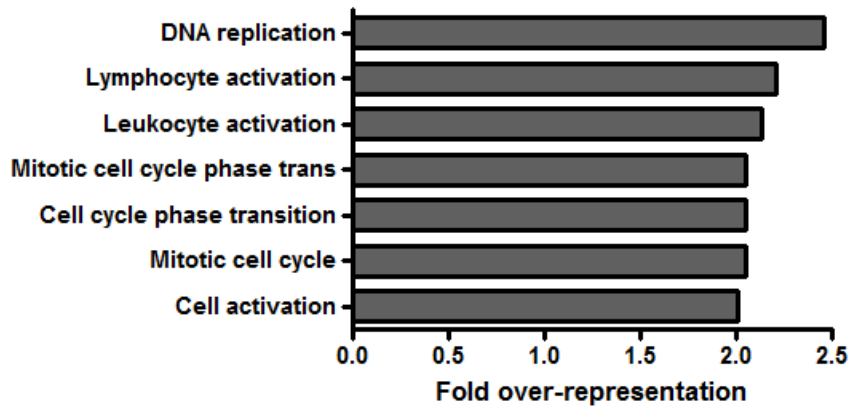

**Supplementary Figure 47.** Biological processes with more than 2 fold over-representation ( $FDR < 10^{-5}$ ) in the down-regulated genes compared to control following serial FMTs in UC patients.

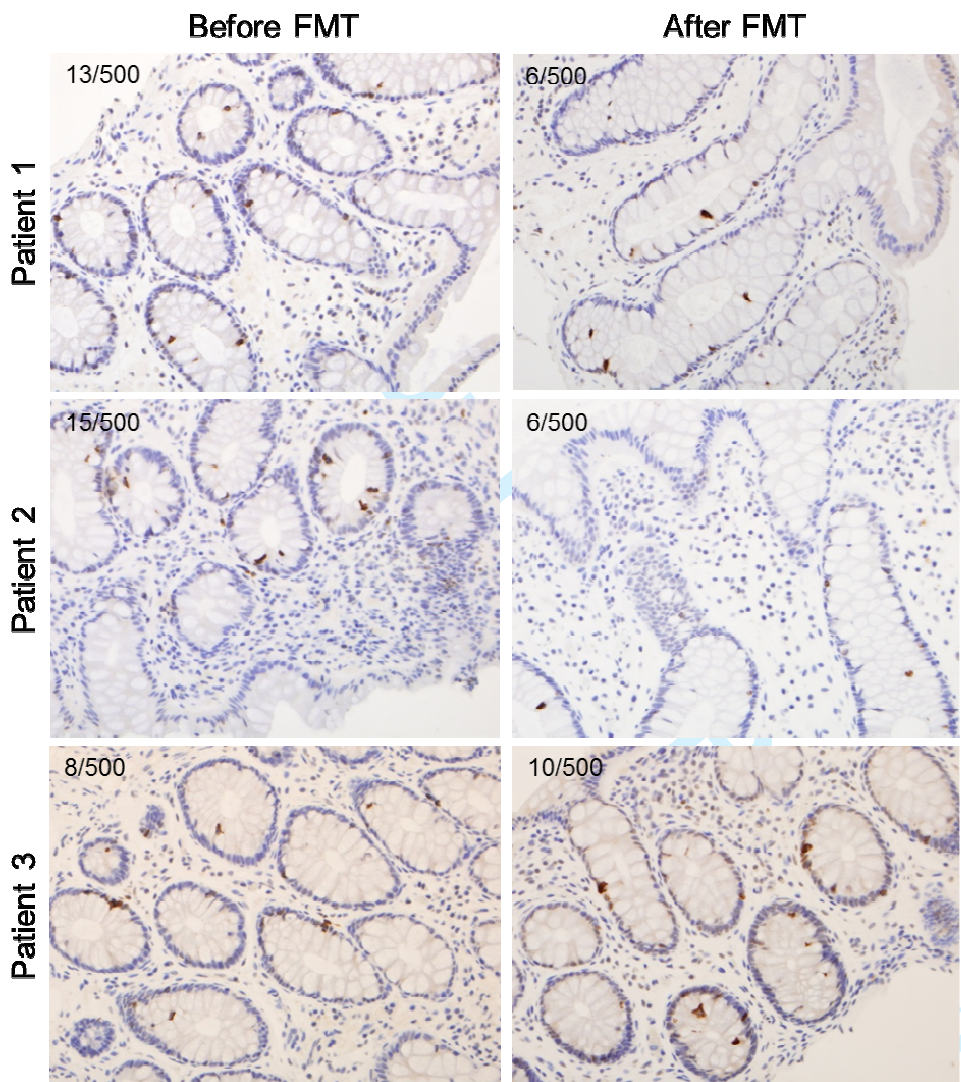

**Supplementary Figure 8. Epithelial Cell Mitosis Suppression Following FMT. In 2 out of 3 patients, the numbers of epithelial mitoses (blinded examination of 500 epithelial cells) decreased by more than 50% following high intensity FMT. Mitoses were highlighted by histone (H3) immunohistochemistry. Magnification 40x**

## References

1. Hamilton MJ, Weingarden AR, Sadowsky MJ, Khoruts A. Standardized Frozen Preparation for Transplantation of Fecal Microbiota for Recurrent *Clostridium difficile* Infection. *Am J Gastroenterol* 2012.
2. Turner D, Otley AR, Mack D, et al. Development, validation, and evaluation of a pediatric ulcerative colitis activity index: a prospective multicenter study. *Gastroenterology* 2007;133:423-32.
3. Brandt LJ, Aroniadis OC, Mellow M, et al. Long-term follow-up of colonoscopic fecal microbiota transplant for recurrent *Clostridium difficile* infection. *Am J Gastroenterol* 2012;107:1079-87.
4. Schroeder KW, Tremaine WJ, Ilstrup DM. Coated oral 5-aminosalicylic acid therapy for mildly to moderately active ulcerative colitis. A randomized study. *N Engl J Med* 1987;317:1625-9.
5. Caporaso JG, Kuczynski J, Stombaugh J, et al. QIIME allows analysis of high-throughput community sequencing data. *Nat Methods* 2010;7:335-6.
6. Riehle K, Coarfa C, Jackson R, et al. The Genboree Microbiome Toolset and the analysis of 16S rRNA microbial sequences. *BCM Bioinformatics* In press.
7. Li W, Godzik A. Cd-hit: a fast program for clustering and comparing large sets of protein or nucleotide sequences. *Bioinformatics* 2006;22:1658-9.
8. Haas BJ, Gevers D, Earl AM, et al. Chimeric 16S rRNA sequence formation and detection in Sanger and 454-pyrosequenced PCR amplicons. *Genome Res* 2011;21:494-504.
9. Wang Q, Garrity GM, Tiedje JM, Cole JR. Naive Bayesian classifier for rapid assignment of rRNA sequences into the new bacterial taxonomy. *Appl Environ Microbiol* 2007;73:5261-7.
